# Supplementary material for: Evaluation of the causal effects of blood metabolites on irritable bowel syndrome: Mendelian randomization
Source: BMC Gastroenterol. 2024 Jan 5;24:19. doi: 10.1186/s12876-023-03111-9 (PMC10768268; doi:10.1186/s12876-023-03111-9)
Supplement: Supplementary file 1 — Additional file 1. [file 12876_2023_3111_MOESM1_ESM.xls]

## Sheet: table1
Supplementary Table 1 List of the identification (ID) for each of the 486 blood metabolites
	Metabolite ID	File name	Metabolite	Status	Super-pathway	Total N
1	M00053	M00053.metabolites.txt	glutamine	Known	Amino acid	7821
2	M00054	M00054.metabolites.txt	tryptophan	Known	Amino acid	7804
3	M00059	M00059.metabolites.txt	histidine	Known	Amino acid	7804
4	M00060	M00060.metabolites.txt	leucine	Known	Amino acid	7799
5	M00063	M00063.metabolites.txt	cholesterol	Known	Lipid	7813
6	M00064	M00064.metabolites.txt	phenylalanine	Known	Amino acid	7803
7	M00513	M00513.metabolites.txt	creatinine	Known	Amino acid	7810
8	M00527	M00527.metabolites.txt	lactate	Known	Carbohydrate	7814
9	M00542	M00542.metabolites.txt	3-hydroxybutyrate (BHBA)	Known	Lipid	7820
10	M00553	M00553.xenobiotics.txt	cotinine	Known	Xenobiotics	1270
11	M00569	M00569.xenobiotics.txt	caffeine	Known	Xenobiotics	7719
12	M00575	M00575.metabolites.txt	arabinose	Known	Carbohydrate	5889
13	M00577	M00577.metabolites.txt	fructose	Known	Carbohydrate	7781
14	M00584	M00584.metabolites.txt	mannose	Known	Carbohydrate	7793
15	M00599	M00599.metabolites.txt	pyruvate	Known	Carbohydrate	7682
16	M00606	M00606.metabolites.txt	uridine	Known	Nucleotide	7800
17	M01105	M01105.metabolites.txt	linoleate (18:2n6)	Known	Lipid	7780
18	M01107	M01107.metabolites.txt	allantoin	Known	Nucleotide	5705
19	M01110	M01110.metabolites.txt	arachidonate (20:4n6)	Known	Lipid	7816
20	M01114	M01114.metabolites.txt	deoxycholate	Known	Lipid	5194
21	M01121	M01121.metabolites.txt	margarate (17:0)	Known	Lipid	7796
22	M01123	M01123.metabolites.txt	inosine	Known	Nucleotide	2675
23	M01125	M01125.metabolites.txt	isoleucine	Known	Amino acid	7801
24	M01284	M01284.metabolites.txt	threonine	Known	Amino acid	6020
25	M01299	M01299.metabolites.txt	tyrosine	Known	Amino acid	7807
26	M01301	M01301.metabolites.txt	lysine	Known	Amino acid	7812
27	M01302	M01302.metabolites.txt	methionine	Known	Amino acid	7795
28	M01303	M01303.metabolites.txt	malate	Known	Energy	7384
29	M01336	M01336.metabolites.txt	palmitate (16:0)	Known	Lipid	7800
30	M01356	M01356.metabolites.txt	nonadecanoate (19:0)	Known	Lipid	7783
31	M01358	M01358.metabolites.txt	stearate (18:0)	Known	Lipid	7803
32	M01359	M01359.metabolites.txt	oleate (18:1n9)	Known	Lipid	7768
33	M01361	M01361.metabolites.txt	pentadecanoate (15:0)	Known	Lipid	7502
34	M01365	M01365.metabolites.txt	myristate (14:0)	Known	Lipid	7811
35	M01444	M01444.metabolites.txt	pipecolate	Known	Amino acid	7792
36	M01493	M01493.metabolites.txt	ornithine	Known	Amino acid	7746
37	M01494	M01494.metabolites.txt	5-oxoproline	Known	Amino acid	7802
38	M01508	M01508.metabolites.txt	pantothenate	Known	Cofactors and vitamins	7604
39	M01515	M01515.xenobiotics.txt	salicylate	Known	Xenobiotics	2374
40	M01558	M01558.metabolites.txt	4-acetamidobutanoate	Known	Amino acid	6930
41	M01561	M01561.metabolites.txt	alpha-tocopherol	Known	Cofactors and vitamins	7725
42	M01564	M01564.metabolites.txt	citrate	Known	Energy	7813
43	M01572	M01572.metabolites.txt	glycerate	Known	Carbohydrate	7778
44	M01573	M01573.metabolites.txt	guanosine	Known	Nucleotide	2343
45	M01585	M01585.metabolites.txt	N-acetylalanine	Known	Amino acid	7720
46	M01604	M01604.metabolites.txt	urate	Known	Nucleotide	7819
47	M01605	M01605.metabolites.txt	ursodeoxycholate	Known	Lipid	5477
48	M01638	M01638.metabolites.txt	arginine	Known	Amino acid	7528
49	M01640	M01640.metabolites.txt	ascorbate (Vitamin C)	Known	Cofactors and vitamins	2085
50	M01644	M01644.metabolites.txt	heptanoate (7:0)	Known	Lipid	7802
51	M01645	M01645.metabolites.txt	laurate (12:0)	Known	Lipid	7793
52	M01649	M01649.metabolites.txt	valine	Known	Amino acid	7808
53	M01670	M01670.metabolites.txt	urea	Known	Amino acid	7796
54	M01712	M01712.metabolites.txt	cortisol	Known	Lipid	7795
55	M01769	M01769.metabolites.txt	cortisone	Known	Lipid	7575
56	M01898	M01898.metabolites.txt	proline	Known	Amino acid	7816
57	M02132	M02132.metabolites.txt	citrulline	Known	Amino acid	7773
58	M02137	M02137.metabolites.txt	biliverdin	Known	Cofactors and vitamins	6686
59	M02342	M02342.metabolites.txt	serotonin (5HT)	Known	Amino acid	6139
60	M02730	M02730.metabolites.txt	gamma-glutamylglutamine	Known	Peptide	7662
61	M02734	M02734.metabolites.txt	gamma-glutamyltyrosine	Known	Peptide	7468
62	M03127	M03127.metabolites.txt	hypoxanthine	Known	Nucleotide	7287
63	M03141	M03141.metabolites.txt	betaine	Known	Amino acid	7806
64	M03147	M03147.metabolites.txt	xanthine	Known	Nucleotide	6845
65	M10642	M10642.metabolites.txt	caprate (10:0)	Known	Lipid	7799
66	M11438	M11438.metabolites.txt	phosphate	Known	Energy	7789
67	M12017	M12017.metabolites.txt	3-methoxytyrosine	Known	Amino acid	5997
68	M12035	M12035.metabolites.txt	pelargonate (9:0)	Known	Lipid	7803
69	M12067	M12067.metabolites.txt	undecanoate (11:0)	Known	Lipid	7500
70	M12129	M12129.metabolites.txt	beta-hydroxyisovalerate	Known	Amino acid	7283
71	M12261	M12261.metabolites.txt	taurodeoxycholate	Known	Lipid	1564
72	M12593	M12593.metabolites.txt	X-02973	Unknown		7759
73	M12626	M12626.metabolites.txt	X-03003	Unknown		7689
74	M12768	M12768.metabolites.txt	X-03088	Unknown		7474
75	M12774	M12774.metabolites.txt	X-03094	Unknown		7804
76	M15122	M15122.metabolites.txt	glycerol	Known	Lipid	7800
77	M15140	M15140.metabolites.txt	kynurenine	Known	Amino acid	7816
78	M15335	M15335.metabolites.txt	mannitol	Known	Carbohydrate	5917
79	M15365	M15365.metabolites.txt	glycerol 3-phosphate (G3P)	Known	Lipid	7781
80	M15488	M15488.metabolites.txt	acetylphosphate	Known	Energy	7789
81	M15500	M15500.metabolites.txt	carnitine	Known	Lipid	7797
82	M15506	M15506.metabolites.txt	choline	Known	Lipid	7750
83	M15630	M15630.metabolites.txt	N-acetylornithine	Known	Amino acid	7574
84	M15650	M15650.metabolites.txt	N1-methyladenosine	Known	Nucleotide	7813
85	M15676	M15676.metabolites.txt	3-methyl-2-oxovalerate	Known	Amino acid	7779
86	M15677	M15677.metabolites.txt	3-methylhistidine	Known	Amino acid	5885
87	M15749	M15749.metabolites.txt	3-phenylpropionate (hydrocinnamate)	Known	Amino acid	6182
88	M15753	M15753.xenobiotics.txt	hippurate	Known	Xenobiotics	7806
89	M15778	M15778.xenobiotics.txt	benzoate	Known	Xenobiotics	7756
90	M15958	M15958.metabolites.txt	phenylacetate	Known	Amino acid	4754
91	M15990	M15990.metabolites.txt	glycerophosphorylcholine (GPC)	Known	Lipid	7156
92	M15996	M15996.metabolites.txt	aspartate	Known	Amino acid	7721
93	M16634	M16634.metabolites.txt	X-04357	Unknown		7502
94	M16816	M16816.metabolites.txt	X-04494	Unknown		5007
95	M16818	M16818.metabolites.txt	X-04495	Unknown		7490
96	M16821	M16821.metabolites.txt	X-04498	Unknown		7160
97	M16822	M16822.metabolites.txt	X-04499--3,4-dihydroxybutyrate	Identified	Amino acid	6948
98	M16823	M16823.metabolites.txt	X-04500	Unknown		3647
99	M17799	M17799.xenobiotics.txt	ibuprofen	Known	Xenobiotics	1976
100	M17805	M17805.metabolites.txt	dihomo-linoleate (20:2n6)	Known	Lipid	7800
101	M17807	M17807.metabolites.txt	X-18601	Unknown		7663
102	M17945	M17945.metabolites.txt	2-hydroxystearate	Known	Lipid	7763
103	M18254	M18254.xenobiotics.txt	paraxanthine	Known	Xenobiotics	7504
104	M18281	M18281.xenobiotics.txt	2-hydroxyhippurate (salicylurate)	Known	Xenobiotics	2592
105	M18283	M18283.metabolites.txt	X-05426	Unknown		6357
106	M18335	M18335.xenobiotics.txt	quinate	Known	Xenobiotics	6265
107	M18349	M18349.metabolites.txt	indolelactate	Known	Amino acid	7378
108	M18357	M18357.metabolites.txt	glycylvaline	Known	Peptide	2108
109	M18369	M18369.metabolites.txt	gamma-glutamylleucine	Known	Peptide	7802
110	M18392	M18392.xenobiotics.txt	theobromine	Known	Xenobiotics	7768
111	M18394	M18394.xenobiotics.txt	theophylline	Known	Xenobiotics	7393
112	M18467	M18467.metabolites.txt	eicosapentaenoate (EPA; 20:5n3)	Known	Lipid	7816
113	M18474	M18474.metabolites.txt	estrone 3-sulfate	Known	Lipid	957
114	M18476	M18476.metabolites.txt	glycocholate	Known	Lipid	5995
115	M18477	M18477.metabolites.txt	glycodeoxycholate	Known	Lipid	1477
116	M18494	M18494.metabolites.txt	taurochenodeoxycholate	Known	Lipid	5716
117	M18497	M18497.metabolites.txt	taurocholate	Known	Lipid	4032
118	M18929	M18929.metabolites.txt	X-05907	Unknown		7734
119	M19323	M19323.metabolites.txt	docosahexaenoate (DHA; 22:6n3)	Known	Lipid	7818
120	M19324	M19324.metabolites.txt	1-stearoylglycerophosphoinositol	Known	Lipid	7694
121	M19362	M19362.metabolites.txt	X-06226	Unknown		7623
122	M19364	M19364.metabolites.txt	X-06246	Unknown		7358
123	M19368	M19368.metabolites.txt	X-06267	Unknown		7075
124	M19396	M19396.metabolites.txt	X-06307	Unknown		6774
125	M19414	M19414.metabolites.txt	X-06350	Unknown		5161
126	M19415	M19415.metabolites.txt	X-06351	Unknown		4791
127	M19934	M19934.metabolites.txt	myo-inositol	linoleat	Lipid	7803
128	M20489	M20489.metabolites.txt	glucose	Known	Carbohydrate	7773
129	M20675	M20675.metabolites.txt	1,5-anhydroglucitol (1,5-AG)	Known	Carbohydrate	7746
130	M20699	M20699.xenobiotics.txt	erythritol	Known	Xenobiotics	7776
131	M21044	M21044.metabolites.txt	2-hydroxybutyrate (AHB)	Known	Amino acid	7815
132	M21047	M21047.metabolites.txt	3-methyl-2-oxobutyrate	Known	Amino acid	7648
133	M21049	M21049.metabolites.txt	1,6-anhydroglucose	Known	Carbohydrate	3663
134	M21127	M21127.metabolites.txt	1-palmitoylglycerol (1-monopalmitin)	Known	Lipid	7429
135	M21151	M21151.xenobiotics.txt	saccharin	Known	Xenobiotics	2449
136	M21184	M21184.metabolites.txt	1-oleoylglycerol (1-monoolein)	Known	Lipid	5717
137	M21188	M21188.metabolites.txt	1-stearoylglycerol (1-monostearin)	Known	Lipid	6965
138	M21630	M21630.metabolites.txt	X-08402	Unknown		7726
139	M22030	M22030.metabolites.txt	2-hydroxyisobutyrate	Known	Amino acid	6539
140	M22032	M22032.metabolites.txt	X-08766	Unknown		6050
141	M22116	M22116.metabolites.txt	4-methyl-2-oxopentanoate	Known	Amino acid	7776
142	M22130	M22130.metabolites.txt	phenyllactate (PLA)	Known	Amino acid	6064
143	M22138	M22138.metabolites.txt	homocitrulline	Known	Amino acid	4135
144	M22175	M22175.metabolites.txt	aspartylphenylalanine	Known	Peptide	3948
145	M22177	M22177.metabolites.txt	levulinate (4-oxovalerate)	Known	Amino acid	6982
146	M22189	M22189.metabolites.txt	palmitoylcarnitine	Known	Lipid	7701
147	M22481	M22481.metabolites.txt	X-08988	Unknown		7776
148	M22548	M22548.metabolites.txt	X-09026	Unknown		7627
149	M22649	M22649.metabolites.txt	X-09108	Unknown		6910
150	M22842	M22842.metabolites.txt	cholate	Known	Lipid	5929
151	M24074	M24074.metabolites.txt	X-09706	Unknown		7697
152	M25459	M25459.metabolites.txt	X-10395	Unknown		7784
153	M25599	M25599.metabolites.txt	X-10429	Unknown		6807
154	M27256	M27256.metabolites.txt	X-10500	Unknown		7751
155	M27273	M27273.metabolites.txt	X-10506	Unknown		7710
156	M27278	M27278.metabolites.txt	X-10510	Unknown		7792
157	M27447	M27447.metabolites.txt	1-linoleoylglycerol (1-monolinolein)	Known	Lipid	2797
158	M27513	M27513.metabolites.txt	indoleacetate	Known	Amino acid	7618
159	M27531	M27531.metabolites.txt	hyodeoxycholate	Known	Lipid	6025
160	M27672	M27672.metabolites.txt	3-indoxyl sulfate	Known	Amino acid	7787
161	M27710	M27710.metabolites.txt	N-acetylglycine	Known	Amino acid	7135
162	M27716	M27716.metabolites.txt	bilirubin (Z,Z)	Known	Cofactors and vitamins	6812
163	M27718	M27718.metabolites.txt	creatine	Known	Amino acid	7822
164	M27722	M27722.metabolites.txt	erythrose	Known	Carbohydrate	7263
165	M27728	M27728.xenobiotics.txt	glycerol 2-phosphate	Known	Xenobiotics	5912
166	M27738	M27738.metabolites.txt	threonate	Known	Cofactors and vitamins	7782
167	M30805	M30805.metabolites.txt	X-10810	Unknown		7232
168	M31453	M31453.metabolites.txt	cysteine	Known	Amino acid	7692
169	M31522	M31522.metabolites.txt	pyroglutamylglycine	Known	Peptide	1586
170	M31536	M31536.xenobiotics.txt	N-(2-furoyl)glycine	Known	Xenobiotics	604
171	M31548	M31548.metabolites.txt	DSGEGDFXAEGGGVR*	Known	Peptide	5371
172	M31555	M31555.metabolites.txt	pyridoxate	Known	Cofactors and vitamins	7703
173	M31591	M31591.metabolites.txt	androsterone sulfate	Known	Lipid	7785
174	M31787	M31787.metabolites.txt	3-carboxy-4-methyl-5-propyl-2-furanpropanoate (CMPF)	Known	Lipid	7812
175	M32197	M32197.metabolites.txt	3-(4-hydroxyphenyl)lactate	Known	Amino acid	7795
176	M32198	M32198.metabolites.txt	acetylcarnitine	Known	Lipid	7805
177	M32315	M32315.metabolites.txt	serine	Known	Amino acid	7796
178	M32319	M32319.metabolites.txt	trans-4-hydroxyproline	Known	Amino acid	7802
179	M32322	M32322.metabolites.txt	glutamate	Known	Amino acid	7804
180	M32328	M32328.metabolites.txt	hexanoylcarnitine	Known	Lipid	7786
181	M32338	M32338.metabolites.txt	glycine	Known	Amino acid	7802
182	M32339	M32339.metabolites.txt	alanine	Known	Amino acid	7788
183	M32346	M32346.metabolites.txt	glycochenodeoxycholate	Known	Lipid	7087
184	M32348	M32348.metabolites.txt	2-aminobutyrate	Known	Amino acid	7814
185	M32379	M32379.metabolites.txt	scyllo-inositol	Known	Lipid	6500
186	M32388	M32388.metabolites.txt	dodecanedioate	Known	Lipid	6478
187	M32393	M32393.metabolites.txt	gamma-glutamylvaline	Known	Peptide	7753
188	M32405	M32405.metabolites.txt	indolepropionate	Known	Amino acid	7803
189	M32412	M32412.metabolites.txt	butyrylcarnitine	Known	Lipid	7796
190	M32418	M32418.metabolites.txt	myristoleate (14:1n5)	Known	Lipid	7804
191	M32425	M32425.metabolites.txt	dehydroisoandrosterone sulfate (DHEA-S)	Known	Lipid	7793
192	M32445	M32445.xenobiotics.txt	3-methylxanthine	Known	Xenobiotics	5396
193	M32452	M32452.metabolites.txt	propionylcarnitine	Known	Lipid	7813
194	M32489	M32489.metabolites.txt	caproate (6:0)	Known	Lipid	7811
195	M32492	M32492.metabolites.txt	caprylate (8:0)	Known	Lipid	7802
196	M32497	M32497.metabolites.txt	10-undecenoate (11:1n1)	Known	Lipid	7806
197	M32504	M32504.metabolites.txt	docosapentaenoate (n3 DPA; 22:5n3)	Known	Lipid	7821
198	M32518	M32518.metabolites.txt	X-11204	Unknown		7799
199	M32549	M32549.metabolites.txt	X-02269	Unknown		7701
200	M32553	M32553.metabolites.txt	phenol sulfate	Known	Amino acid	7810
201	M32557	M32557.metabolites.txt	X-06126	Unknown		7785
202	M32560	M32560.metabolites.txt	X-07765	Unknown		2170
203	M32564	M32564.metabolites.txt	X-11247	Unknown		7403
204	M32578	M32578.metabolites.txt	X-11261	Unknown		7771
205	M32586	M32586.metabolites.txt	bilirubin (E,E)*	Known	Cofactors and vitamins	7748
206	M32587	M32587.metabolites.txt	X-02249	Unknown		7818
207	M32593	M32593.metabolites.txt	heme*	Known	Cofactors and vitamins	6380
208	M32616	M32616.metabolites.txt	X-11299	Unknown		7347
209	M32632	M32632.metabolites.txt	X-11315	Unknown		7785
210	M32634	M32634.metabolites.txt	X-11317	Unknown		7811
211	M32635	M32635.metabolites.txt	1-linoleoylglycerophosphoethanolamine*	Known	Lipid	7817
212	M32644	M32644.metabolites.txt	X-11327	Unknown		7671
213	M32651	M32651.metabolites.txt	X-11334	Unknown		5462
214	M32654	M32654.metabolites.txt	3-dehydrocarnitine*	Known	Lipid	7809
215	M32672	M32672.metabolites.txt	pyroglutamine*	Known	Amino acid	7800
216	M32675	M32675.metabolites.txt	C-glycosyltryptophan*	Known	Amino acid	7786
217	M32691	M32691.metabolites.txt	X-11374	Unknown		2609
218	M32698	M32698.metabolites.txt	X-11381	Unknown		7753
219	M32709	M32709.metabolites.txt	X-03056--N-[3-(2-Oxopyrrolidin-1-yl)propyl]acetamide	Identified	Amino acid	7812
220	M32729	M32729.metabolites.txt	X-11412	Unknown		6935
221	M32735	M32735.metabolites.txt	X-01911	Unknown		6360
222	M32739	M32739.metabolites.txt	X-11422--xanthine	Identified	Nucleotide	6346
223	M32740	M32740.metabolites.txt	X-11423--O-sulfo-L-tyrosine	Identified	Amino acid	7765
224	M32753	M32753.metabolites.txt	X-09789	Unknown		7805
225	M32754	M32754.metabolites.txt	X-11437	Unknown		6782
226	M32755	M32755.metabolites.txt	X-11438	Unknown		7084
227	M32757	M32757.metabolites.txt	X-11440	Unknown		7686
228	M32758	M32758.metabolites.txt	X-11441	Unknown		7072
229	M32759	M32759.metabolites.txt	X-11442	Unknown		7142
230	M32761	M32761.metabolites.txt	X-11444	Unknown		7758
231	M32762	M32762.metabolites.txt	X-11445--5-alpha-pregnan-3beta,20alpha-disulfate	Identified	Lipid	2570
232	M32769	M32769.metabolites.txt	X-11452	Unknown		6519
233	M32786	M32786.metabolites.txt	X-11469	Unknown		7779
234	M32787	M32787.metabolites.txt	X-11470	Unknown		7271
235	M32795	M32795.metabolites.txt	X-11478	Unknown		6593
236	M32800	M32800.metabolites.txt	X-11483	Unknown		4608
237	M32802	M32802.metabolites.txt	X-11485	Unknown		4544
238	M32808	M32808.metabolites.txt	X-11491	Unknown		6584
239	M32814	M32814.metabolites.txt	X-11497	Unknown		7481
240	M32836	M32836.metabolites.txt	HWESASXX*	Known	Peptide	7700
241	M32838	M32838.metabolites.txt	X-11521	Unknown		7193
242	M32846	M32846.metabolites.txt	X-11529	Unknown		6664
243	M32847	M32847.metabolites.txt	X-11530	Unknown		7409
244	M32854	M32854.metabolites.txt	X-11537	Unknown		2719
245	M32855	M32855.metabolites.txt	X-11538	Unknown		7804
246	M32857	M32857.metabolites.txt	X-11540	Unknown		2688
247	M32863	M32863.metabolites.txt	X-11546	Unknown		2015
248	M32867	M32867.metabolites.txt	X-11550	Unknown		7776
249	M32869	M32869.metabolites.txt	X-11552	Unknown		2170
250	M32910	M32910.metabolites.txt	X-11593--O-methylascorbate*	Identified	Cofactors and vitamins	7788
251	M32980	M32980.metabolites.txt	adrenate (22:4n6)	Known	Lipid	7778
252	M33009	M33009.metabolites.txt	homostachydrine*	Known	Xenobiotics	3003
253	M33084	M33084.metabolites.txt	ADSGEGDFXAEGGGVR*	Known	Peptide	5588
254	M33131	M33131.metabolites.txt	X-11786--methylcysteine	Identified	Amino acid	2811
255	M33132	M33132.metabolites.txt	X-11787	Unknown		7811
256	M33137	M33137.metabolites.txt	X-11792	Unknown		2442
257	M33138	M33138.metabolites.txt	X-11793--oxidized bilirubin*	Identified	Cofactors and vitamins	7611
258	M33140	M33140.metabolites.txt	X-11795	Unknown		7763
259	M33144	M33144.metabolites.txt	X-11799	Unknown		5038
260	M33150	M33150.metabolites.txt	X-11805	Unknown		2814
261	M33163	M33163.metabolites.txt	X-11818	Unknown		6790
262	M33165	M33165.metabolites.txt	X-11820	Unknown		7710
263	M33173	M33173.xenobiotics.txt	2-hydroxyacetaminophen sulfate*	Known	Xenobiotics	1688
264	M33178	M33178.xenobiotics.txt	2-methoxyacetaminophen sulfate*	Known	Xenobiotics	1086
265	M33188	M33188.metabolites.txt	X-11843	Unknown		3938
266	M33190	M33190.metabolites.txt	X-11845	Unknown		2741
267	M33192	M33192.metabolites.txt	X-11847	Unknown		6059
268	M33194	M33194.metabolites.txt	X-11849	Unknown		5350
269	M33195	M33195.metabolites.txt	X-11850	Unknown		4868
270	M33197	M33197.metabolites.txt	X-11852	Unknown		2974
271	M33203	M33203.metabolites.txt	X-11858	Unknown		3427
272	M33204	M33204.metabolites.txt	X-11859	Unknown		2721
273	M33221	M33221.metabolites.txt	X-11876	Unknown		4965
274	M33228	M33228.metabolites.txt	1-arachidonoylglycerophosphocholine*	Known	Lipid	7507
275	M33230	M33230.metabolites.txt	1-palmitoleoylglycerophosphocholine*	Known	Lipid	7812
276	M33250	M33250.metabolites.txt	X-11905	Unknown		4761
277	M33353	M33353.metabolites.txt	X-12007	Unknown		1362
278	M33359	M33359.metabolites.txt	X-12013	Unknown		1948
279	M33363	M33363.metabolites.txt	gamma-glutamylmethionine*	Known	Peptide	2240
280	M33364	M33364.metabolites.txt	gamma-glutamylthreonine*	Known	Peptide	4016
281	M33380	M33380.metabolites.txt	X-12029	Unknown		7564
282	M33384	M33384.xenobiotics.txt	salicyluric glucuronide*	Known	Xenobiotics	832
283	M33389	M33389.metabolites.txt	X-12038	Unknown		7758
284	M33390	M33390.metabolites.txt	X-12039	Unknown		5461
285	M33391	M33391.metabolites.txt	X-12040	Unknown		559
286	M33408	M33408.metabolites.txt	X-12056	Unknown		4130
287	M33415	M33415.metabolites.txt	X-12063	Unknown		7197
288	M33420	M33420.metabolites.txt	gamma-tocopherol	Known	Cofactors and vitamins	6226
289	M33422	M33422.metabolites.txt	gamma-glutamylphenylalanine	Known	Peptide	7753
290	M33423	M33423.xenobiotics.txt	p-acetamidophenylglucuronide	Known	Xenobiotics	1494
291	M33441	M33441.metabolites.txt	isobutyrylcarnitine	Known	Amino acid	7812
292	M33442	M33442.metabolites.txt	pseudouridine	Known	Nucleotide	7785
293	M33443	M33443.metabolites.txt	valerate	Known	Lipid	4102
294	M33447	M33447.metabolites.txt	palmitoleate (16:1n7)	Known	Lipid	7776
295	M33453	M33453.metabolites.txt	alpha-ketoglutarate	Known	Energy	6130
296	M33477	M33477.metabolites.txt	erythronate*	Known	Carbohydrate	7752
297	M33488	M33488.metabolites.txt	lathosterol	Known	Lipid	5457
298	M33507	M33507.metabolites.txt	X-12092	Unknown		7500
299	M33508	M33508.metabolites.txt	X-12093	Unknown		2854
300	M33509	M33509.metabolites.txt	X-12094	Unknown		7467
301	M33510	M33510.metabolites.txt	X-12095--N1-methyl-3-pyridone-4-carboxamide	Identified	Nucleotide	7711
302	M33515	M33515.metabolites.txt	X-12100--hydroxytryptophan*	Identified	Amino acid	7499
303	M33531	M33531.metabolites.txt	X-12116	Unknown		3039
304	M33587	M33587.metabolites.txt	eicosenoate (20:1n9 or 11)	Known	Lipid	7799
305	M33609	M33609.metabolites.txt	X-12188	Unknown		832
306	M33610	M33610.metabolites.txt	X-12189	Unknown		481
307	M33627	M33627.metabolites.txt	X-12206	Unknown		2795
308	M33633	M33633.metabolites.txt	X-12212	Unknown		4566
309	M33637	M33637.metabolites.txt	X-12216	Unknown		5369
310	M33638	M33638.metabolites.txt	X-12217	Unknown		6469
311	M33652	M33652.metabolites.txt	X-12230	Unknown		5649
312	M33653	M33653.metabolites.txt	X-12231	Unknown		5111
313	M33658	M33658.metabolites.txt	X-12236	Unknown		1924
314	M33666	M33666.metabolites.txt	X-12244--N-acetylcarnosine	Identified	Peptide	6608
315	M33675	M33675.metabolites.txt	X-12253	Unknown		6004
316	M33683	M33683.metabolites.txt	X-12261	Unknown		1050
317	M33751	M33751.metabolites.txt	X-12329	Unknown		867
318	M33782	M33782.metabolites.txt	X-10346	Unknown		4207
319	M33801	M33801.metabolites.txt	ADpSGEGDFXAEGGGVR*	Known	Peptide	3939
320	M33821	M33821.metabolites.txt	1-eicosatrienoylglycerophosphocholine*	Known	Lipid	7809
321	M33822	M33822.metabolites.txt	1-docosahexaenoylglycerophosphocholine*	Known	Lipid	7798
322	M33833	M33833.metabolites.txt	X-12405	Unknown		6676
323	M33835	M33835.metabolites.txt	X-12407	Unknown		2814
324	M33864	M33864.metabolites.txt	X-12428	Unknown		1439
325	M33871	M33871.metabolites.txt	1-eicosadienoylglycerophosphocholine*	Known	Lipid	6892
326	M33877	M33877.metabolites.txt	X-12435	Unknown		231
327	M33883	M33883.metabolites.txt	X-12441--12-hydroxyeicosatetraenoate (12-HETE)	Identified	Lipid	2761
328	M33884	M33884.metabolites.txt	X-12442--5,8-tetradecadienoate	Identified	Lipid	7780
329	M33885	M33885.metabolites.txt	X-12443	Unknown		5357
330	M33892	M33892.metabolites.txt	X-12450	Unknown		6432
331	M33901	M33901.metabolites.txt	X-12456	Unknown		4774
332	M33910	M33910.metabolites.txt	X-12465	Unknown		5883
333	M33935	M33935.xenobiotics.txt	piperine	Known	Xenobiotics	7173
334	M33936	M33936.metabolites.txt	octanoylcarnitine	Known	Lipid	7790
335	M33937	M33937.metabolites.txt	alpha-hydroxyisovalerate	Known	Amino acid	7668
336	M33939	M33939.metabolites.txt	N-acetylthreonine	Known	Amino acid	6909
337	M33941	M33941.metabolites.txt	decanoylcarnitine	Known	Lipid	7766
338	M33955	M33955.metabolites.txt	1-palmitoylglycerophosphocholine	Known	Lipid	7803
339	M33957	M33957.metabolites.txt	1-heptadecanoylglycerophosphocholine	Known	Lipid	7422
340	M33960	M33960.metabolites.txt	1-oleoylglycerophosphocholine	Known	Lipid	7812
341	M33961	M33961.metabolites.txt	1-stearoylglycerophosphocholine	Known	Lipid	7817
342	M33968	M33968.metabolites.txt	5-dodecenoate (12:1n7)	Known	Lipid	7770
343	M33969	M33969.metabolites.txt	stearidonate (18:4n3)	Known	Lipid	7775
344	M33971	M33971.metabolites.txt	10-heptadecenoate (17:1n7)	Known	Lipid	7795
345	M33972	M33972.metabolites.txt	10-nonadecenoate (19:1n9)	Known	Lipid	7789
346	M33973	M33973.metabolites.txt	epiandrosterone sulfate	Known	Lipid	7769
347	M34035	M34035.metabolites.txt	linolenate [alpha or gamma; (18:3n3 or 6)]	Known	Lipid	7786
348	M34040	M34040.metabolites.txt	X-12510--2-aminooctanoic acid	Identified	Amino acid	7566
349	M34062	M34062.metabolites.txt	X-12524	Unknown		7809
350	M34106	M34106.metabolites.txt	bilirubin (E,Z or Z,E)*	Known	Cofactors and vitamins	5295
351	M34109	M34109.xenobiotics.txt	metoprolol acid metabolite*	Known	Xenobiotics	286
352	M34112	M34112.metabolites.txt	X-12544	Unknown		5893
353	M34123	M34123.metabolites.txt	X-12556	Unknown		7483
354	M34214	M34214.metabolites.txt	1-arachidonoylglycerophosphoinositol*	Known	Lipid	7797
355	M34221	M34221.metabolites.txt	X-12627	Unknown		7419
356	M34244	M34244.metabolites.txt	X-12644	Unknown		7795
357	M34245	M34245.metabolites.txt	X-12645	Unknown		5254
358	M34283	M34283.metabolites.txt	asparagine	Known	Amino acid	7761
359	M34289	M34289.metabolites.txt	X-12680	Unknown		2311
360	M34306	M34306.metabolites.txt	X-12696	Unknown		7409
361	M34314	M34314.metabolites.txt	X-12704	Unknown		1813
362	M34322	M34322.metabolites.txt	X-12712	Unknown		260
363	M34327	M34327.metabolites.txt	X-12717	Unknown		1632
364	M34329	M34329.metabolites.txt	X-12719	Unknown		1539
365	M34336	M34336.metabolites.txt	X-12726	Unknown		5495
366	M34338	M34338.metabolites.txt	X-12728	Unknown		537
367	M34339	M34339.metabolites.txt	X-12729	Unknown		1753
368	M34344	M34344.metabolites.txt	X-12734	Unknown		5616
369	M34350	M34350.metabolites.txt	X-12740	Unknown		3731
370	M34359	M34359.metabolites.txt	X-12749	Unknown		7178
371	M34365	M34365.xenobiotics.txt	3-(cystein-S-yl)acetaminophen*	Known	Xenobiotics	1024
372	M34384	M34384.xenobiotics.txt	stachydrine	Known	Xenobiotics	6745
373	M34389	M34389.xenobiotics.txt	1-methylxanthine	Known	Xenobiotics	5504
374	M34390	M34390.xenobiotics.txt	7-methylxanthine	Known	Xenobiotics	5901
375	M34395	M34395.xenobiotics.txt	1-methylurate	Known	Xenobiotics	5520
376	M34400	M34400.xenobiotics.txt	1,7-dimethylurate	Known	Xenobiotics	6057
377	M34404	M34404.xenobiotics.txt	1,3,7-trimethylurate	Known	Xenobiotics	796
378	M34407	M34407.metabolites.txt	isovalerylcarnitine	Known	Amino acid	7789
379	M34409	M34409.metabolites.txt	stearoylcarnitine	Known	Lipid	7183
380	M34416	M34416.metabolites.txt	1-stearoylglycerophosphoethanolamine	Known	Lipid	7369
381	M34419	M34419.metabolites.txt	1-linoleoylglycerophosphocholine	Known	Lipid	7795
382	M34420	M34420.metabolites.txt	bradykinin, des-arg(9)	Known	Peptide	4570
383	M34441	M34441.metabolites.txt	X-12771	Unknown		4734
384	M34453	M34453.metabolites.txt	X-12776	Unknown		7764
385	M34456	M34456.metabolites.txt	gamma-glutamylisoleucine*	Known	Peptide	5522
386	M34469	M34469.metabolites.txt	X-12786	Unknown		6566
387	M34481	M34481.metabolites.txt	X-12798	Unknown		7552
388	M34499	M34499.metabolites.txt	X-12816	Unknown		4524
389	M34513	M34513.metabolites.txt	X-12830	Unknown		3415
390	M34516	M34516.metabolites.txt	X-12833	Unknown		243
391	M34527	M34527.metabolites.txt	X-12844	Unknown		7768
392	M34530	M34530.metabolites.txt	X-12847	Unknown		4036
393	M34533	M34533.metabolites.txt	X-12850	Unknown		6251
394	M34534	M34534.metabolites.txt	laurylcarnitine	Known	Lipid	5170
395	M34535	M34535.metabolites.txt	X-12851	Unknown		4808
396	M34539	M34539.metabolites.txt	X-12855	Unknown		5120
397	M34674	M34674.metabolites.txt	X-12990--docosapentaenoic acid (n6-DPA)	Identified	Lipid	2581
398	M34732	M34732.metabolites.txt	isovalerate	Known	Lipid	7080
399	M34761	M34761.metabolites.txt	X-13069	Unknown		6770
400	M34878	M34878.metabolites.txt	X-13183--stearamide	Identified	Lipid	2503
401	M34912	M34912.metabolites.txt	X-13215	Unknown		6305
402	M35114	M35114.metabolites.txt	7-methylguanine	Known	Nucleotide	6091
403	M35126	M35126.metabolites.txt	phenylacetylglutamine	Known	Amino acid	7812
404	M35127	M35127.metabolites.txt	pro-hydroxy-pro	Known	Peptide	7787
405	M35137	M35137.metabolites.txt	N2,N2-dimethylguanosine	Known	Nucleotide	5228
406	M35159	M35159.metabolites.txt	cysteine-glutathione disulfide	Known	Amino acid	1997
407	M35160	M35160.metabolites.txt	oleoylcarnitine	Known	Lipid	7708
408	M35186	M35186.metabolites.txt	1-arachidonoylglycerophosphoethanolamine*	Known	Lipid	7798
409	M35187	M35187.metabolites.txt	X-13429	Unknown		6344
410	M35189	M35189.metabolites.txt	X-13431--nonanoylcarnitine*	Identified	Lipid	6591
411	M35193	M35193.metabolites.txt	X-13435	Unknown		6970
412	M35240	M35240.metabolites.txt	X-13477	Unknown		5952
413	M35253	M35253.metabolites.txt	2-palmitoylglycerophosphocholine*	Known	Lipid	7695
414	M35254	M35254.metabolites.txt	2-oleoylglycerophosphocholine*	Known	Lipid	7524
415	M35255	M35255.metabolites.txt	2-stearoylglycerophosphocholine*	Known	Lipid	7730
416	M35257	M35257.metabolites.txt	2-linoleoylglycerophosphocholine*	Known	Lipid	6894
417	M35270	M35270.metabolites.txt	X-13496	Unknown		7656
418	M35305	M35305.metabolites.txt	1-palmitoylglycerophosphoinositol*	Known	Lipid	6282
419	M35320	M35320.xenobiotics.txt	catechol sulfate	Known	Xenobiotics	7807
420	M35322	M35322.xenobiotics.txt	hydroquinone sulfate	Known	Xenobiotics	451
421	M35326	M35326.metabolites.txt	X-13548	Unknown		6022
422	M35327	M35327.metabolites.txt	X-13549	Unknown		7330
423	M35331	M35331.metabolites.txt	X-13553	Unknown		3085
424	M35397	M35397.metabolites.txt	X-13619	Unknown		7791
425	M35431	M35431.metabolites.txt	2-methylbutyroylcarnitine	Known	Amino acid	7420
426	M35433	M35433.metabolites.txt	hydroxyisovaleroyl carnitine	Known	Amino acid	5588
427	M35439	M35439.metabolites.txt	glutaroyl carnitine	Known	Amino acid	7701
428	M35451	M35451.metabolites.txt	X-13658	Unknown		1412
429	M35464	M35464.metabolites.txt	X-13671	Unknown		7311
430	M35472	M35472.metabolites.txt	2-tetradecenoyl carnitine	Known	Lipid	6998
431	M35527	M35527.metabolites.txt	4-hydroxyhippurate	Known	Xenobiotics	4368
432	M35551	M35551.metabolites.txt	X-13741	Unknown		5325
433	M35626	M35626.metabolites.txt	1-myristoylglycerophosphocholine	Known	Lipid	7812
434	M35628	M35628.metabolites.txt	1-oleoylglycerophosphoethanolamine	Known	Lipid	7749
435	M35631	M35631.metabolites.txt	1-palmitoylglycerophosphoethanolamine	Known	Lipid	7763
436	M35635	M35635.metabolites.txt	3-(3-hydroxyphenyl)propionate	Known	Amino acid	1163
437	M35669	M35669.metabolites.txt	tetradecanedioate	Known	Lipid	6046
438	M35675	M35675.metabolites.txt	2-hydroxypalmitate	Known	Lipid	7797
439	M35678	M35678.metabolites.txt	hexadecanedioate	Known	Lipid	6887
440	M35718	M35718.metabolites.txt	dihomo-linolenate (20:3n3 or n6)	Known	Lipid	7805
441	M35754	M35754.metabolites.txt	X-13859	Unknown		7002
442	M35854	M35854.metabolites.txt	threitol	Known	Carbohydrate	7381
443	M35977	M35977.metabolites.txt	X-14056	Unknown		7259
444	M35978	M35978.metabolites.txt	X-14057	Unknown		4716
445	M36009	M36009.metabolites.txt	X-14086	Unknown		2686
446	M36095	M36095.xenobiotics.txt	thymol sulfate	Known	Xenobiotics	4172
447	M36097	M36097.xenobiotics.txt	4-acetaminophen sulfate	Known	Xenobiotics	498
448	M36098	M36098.xenobiotics.txt	4-vinylphenol sulfate	Known	Xenobiotics	7483
449	M36099	M36099.xenobiotics.txt	4-ethylphenylsulfate	Known	Xenobiotics	6012
450	M36103	M36103.metabolites.txt	p-cresol sulfate	Known	Amino acid	7758
451	M36115	M36115.metabolites.txt	X-14189--leucylalanine	Identified	Peptide	2745
452	M36131	M36131.metabolites.txt	X-14205--alpha-glutamyltyrosine	Identified	Peptide	1789
453	M36134	M36134.metabolites.txt	X-14208--phenylalanylserine	Identified	Peptide	2455
454	M36230	M36230.metabolites.txt	X-14304--leucylalanine	Identified	Peptide	2434
455	M36300	M36300.metabolites.txt	X-14374	Unknown		7627
456	M36376	M36376.metabolites.txt	X-14450--phenylalanylleucine	Identified	Peptide	2555
457	M36399	M36399.metabolites.txt	X-14473	Unknown		6884
458	M36468	M36468.metabolites.txt	X-14541	Unknown		1941
459	M36515	M36515.metabolites.txt	X-14588	Unknown		7777
460	M36552	M36552.metabolites.txt	X-14625	Unknown		7511
461	M36553	M36553.metabolites.txt	X-14626	Unknown		6904
462	M36559	M36559.metabolites.txt	X-14632	Unknown		1703
463	M36585	M36585.metabolites.txt	X-14658	Unknown		3533
464	M36589	M36589.metabolites.txt	X-14662	Unknown		4212
465	M36673	M36673.metabolites.txt	X-14745	Unknown		5602
466	M36738	M36738.metabolites.txt	gamma-glutamylglutamate	Known	Peptide	931
467	M36754	M36754.metabolites.txt	octadecanedioate	Known	Lipid	7300
468	M36756	M36756.metabolites.txt	leucylleucine	Known	Peptide	3386
469	M36776	M36776.metabolites.txt	7-alpha-hydroxy-3-oxo-4-cholestenoate (7-Hoca)	Known	Lipid	7784
470	M36802	M36802.metabolites.txt	n-Butyl Oleate	Known	Lipid	4542
471	M36808	M36808.metabolites.txt	dimethylarginine (SDMA + ADMA)	Known	Amino acid	7347
472	M36850	M36850.metabolites.txt	taurolithocholate 3-sulfate	Known	Lipid	6904
473	M37004	M37004.metabolites.txt	X-14977--vanillin	Identified	Xenobiotics	1789
474	M37058	M37058.metabolites.txt	succinylcarnitine	Known	Energy	6948
475	M37097	M37097.metabolites.txt	tryptophan betaine	Known	Amino acid	7439
476	M37104	M37104.metabolites.txt	cyclo(leu-pro)	Known	Peptide	4833
477	M37112	M37112.metabolites.txt	chiro-inositol	Known	Lipid	2729
478	M37190	M37190.metabolites.txt	5alpha-androstan-3beta,17beta-diol disulfate	Known	Lipid	7345
479	M37202	M37202.metabolites.txt	4-androsten-3beta,17beta-diol disulfate 1*	Known	Lipid	7804
480	M37203	M37203.metabolites.txt	4-androsten-3beta,17beta-diol disulfate 2*	Known	Lipid	7776
481	M37253	M37253.metabolites.txt	2-hydroxyglutarate	Known	Lipid	6287
482	M37459	M37459.metabolites.txt	ergothioneine	Known	Xenobiotics	4453
483	M37506	M37506.metabolites.txt	palmitoyl sphingomyelin	Known	Lipid	7814
484	M38150	M38150.metabolites.txt	phenylalanylphenylalanine	Known	Peptide	4961
485	M38178	M38178.metabolites.txt	cis-4-decenoyl carnitine	Known	Lipid	7660
486	M38768	M38768.metabolites.txt	15-methylpalmitate (isobar with 2-methylpalmitate)	Known	Lipid	7371

## Sheet: table 2
Supplementary Table 2 Harmonization data of 486 blood metabolites and IBS
SNP	effect_allele.exposure	other_allele.exposure	effect_allele.outcome	other_allele.outcome	beta.exposure	beta.outcome	eaf.exposure	eaf.outcome	remove	palindromic	ambiguous	id.outcome	pval.outcome	se.outcome	outcome	mr_keep.outcome	pval_origin.outcome	data_source.outcome	se.exposure	pval.exposure	samplesize.exposure	exposure		mr_keep.exposure	pval_origin.exposure	id.exposure	action	mr_keep	samplesize.outcome	R2	F
rs10066453	C	G	C	G	0.0165	0.0061	0.0387	0.0286	FALSE	TRUE	FALSE	xrxeCl	0.7702	0.021	IBS	TRUE	reported	textfile	0.0035	1.928e-06	7347	M01302.metal.pos.txt.gz	methionine	TRUE	reported	hfKj9T	2	TRUE	333768	0.00301585	22.2184
rs11232103	A	C	A	C	0.0085	0.0095	0.1151	0.1121	FALSE	FALSE	FALSE	xrxeCl	0.4204	0.0118	IBS	TRUE	reported	textfile	0.0017	3.697e-07	7347	M01302.metal.pos.txt.gz	methionine	TRUE	reported	hfKj9T	2	TRUE	333768	0.00339121	24.9932
rs11760350	A	G	A	G	-0.0075	-0.015	0.1238	0.1266	FALSE	FALSE	FALSE	xrxeCl	0.1453	0.0103	IBS	TRUE	reported	textfile	0.0017	7.77e-06	7347	M01302.metal.pos.txt.gz	methionine	TRUE	reported	hfKj9T	2	TRUE	333768	0.0026422	19.4584
rs16839317	T	C	T	C	-0.0078	-0.0037	0.8726	0.869	FALSE	FALSE	FALSE	xrxeCl	0.7174	0.0101	IBS	TRUE	reported	textfile	0.0017	2.753e-06	7347	M01302.metal.pos.txt.gz	methionine	TRUE	reported	hfKj9T	2	TRUE	333768	0.00285719	21.0462
rs1742639	A	G	A	G	0.0077	-0.0132	0.8865	0.8861	FALSE	FALSE	FALSE	xrxeCl	0.2209	0.0108	IBS	TRUE	reported	textfile	0.0017	7.939e-06	7347	M01302.metal.pos.txt.gz	methionine	TRUE	reported	hfKj9T	2	TRUE	333768	0.0027846	20.51
rs17478241	T	C	T	C	-0.0076	-0.0014	0.168	0.1971	FALSE	FALSE	FALSE	xrxeCl	0.8766	0.0087	IBS	TRUE	reported	textfile	0.0016	2.751e-06	7347	M01302.metal.pos.txt.gz	methionine	TRUE	reported	hfKj9T	2	TRUE	333768	0.00306158	22.5564
rs2066415	T	C	T	C	0.0065	-0.0033	0.3567	0.3806	FALSE	FALSE	FALSE	xrxeCl	0.6433	0.0071	IBS	TRUE	reported	textfile	0.0015	8.628e-06	7347	M01302.metal.pos.txt.gz	methionine	TRUE	reported	hfKj9T	2	TRUE	333768	0.00254933	18.7727
rs2418886	A	G	A	G	0.0223	0.0104	0.0489	0.0504	FALSE	FALSE	FALSE	xrxeCl	0.5118	0.0158	IBS	TRUE	reported	textfile	0.0047	1.63e-06	1762	M01302.metal.pos.txt.gz	methionine	TRUE	reported	hfKj9T	2	TRUE	333768	0.0126152	22.4864
rs2780242	T	C	T	C	-0.0083	-0.0097	0.1138	0.1286	FALSE	FALSE	FALSE	xrxeCl	0.3522	0.0104	IBS	TRUE	reported	textfile	0.0018	3.849e-06	7347	M01302.metal.pos.txt.gz	methionine	TRUE	reported	hfKj9T	2	TRUE	333768	0.00288567	21.2566
rs320485	T	C	T	C	0.0094	0.0121	0.1324	0.1361	FALSE	FALSE	FALSE	xrxeCl	0.2228	0.0099	IBS	TRUE	reported	textfile	0.0017	4.97e-08	7347	M01302.metal.pos.txt.gz	methionine	TRUE	reported	hfKj9T	2	TRUE	333768	0.00414423	30.5661
rs3740996	A	G	A	G	0.0078	-0.0113	0.1208	0.1256	FALSE	FALSE	FALSE	xrxeCl	0.2732	0.0103	IBS	TRUE	reported	textfile	0.0017	4.33e-06	7347	M01302.metal.pos.txt.gz	methionine	TRUE	reported	hfKj9T	2	TRUE	333768	0.00285719	21.0462
rs4693555	T	C	T	C	-0.0069	-0.0171	0.2131	0.2653	FALSE	FALSE	FALSE	xrxeCl	0.04402	0.0085	IBS	TRUE	reported	textfile	0.0016	8.434e-06	7347	M01302.metal.pos.txt.gz	methionine	TRUE	reported	hfKj9T	2	TRUE	333768	0.00252494	18.5926
rs487946	T	G	T	G	-0.0074	-0.004	0.8292	0.8119	FALSE	FALSE	FALSE	xrxeCl	0.6457	0.0087	IBS	TRUE	reported	textfile	0.0016	3.096e-06	7347	M01302.metal.pos.txt.gz	methionine	TRUE	reported	hfKj9T	2	TRUE	333768	0.00290303	21.3848
rs6008767	C	G	C	G	-0.0077	-0.0066	0.8182	0.8064	FALSE	TRUE	FALSE	xrxeCl	0.4844	0.0094	IBS	TRUE	reported	textfile	0.0017	4.115e-06	7347	M01302.metal.pos.txt.gz	methionine	TRUE	reported	hfKj9T	2	TRUE	333768	0.0027846	20.51
rs6071991	T	C	T	C	-0.0075	-0.0239	0.1495	0.1602	FALSE	FALSE	FALSE	xrxeCl	0.014	0.0097	IBS	TRUE	reported	textfile	0.0016	3.811e-06	7347	M01302.metal.pos.txt.gz	methionine	TRUE	reported	hfKj9T	2	TRUE	333768	0.00298178	21.9667
rs6533609	T	C	T	C	-0.0077	-0.0049	0.1429	0.1509	FALSE	FALSE	FALSE	xrxeCl	0.6067	0.0096	IBS	TRUE	reported	textfile	0.0017	3.776e-06	7347	M01302.metal.pos.txt.gz	methionine	TRUE	reported	hfKj9T	2	TRUE	333768	0.0027846	20.51
rs6766715	A	G	A	G	-0.009	-0.0082	0.128	0.1313	FALSE	FALSE	FALSE	xrxeCl	0.4171	0.0101	IBS	TRUE	reported	textfile	0.002	6.795e-06	5585	M01302.metal.pos.txt.gz	methionine	TRUE	reported	hfKj9T	2	TRUE	333768	0.00361268	20.2427
rs6960830	T	C	T	C	0.0078	0.0107	0.8851	0.8783	FALSE	FALSE	FALSE	xrxeCl	0.3102	0.0105	IBS	TRUE	reported	textfile	0.0017	4.158e-06	7347	M01302.metal.pos.txt.gz	methionine	TRUE	reported	hfKj9T	2	TRUE	333768	0.00285719	21.0462
rs7570141	A	G	A	G	-0.0119	0.0152	0.104	0.128	FALSE	FALSE	FALSE	xrxeCl	0.1707	0.0111	IBS	TRUE	reported	textfile	0.0026	6.212e-06	7347	M01302.metal.pos.txt.gz	methionine	TRUE	reported	hfKj9T	2	TRUE	333768	0.00284316	20.9425
rs885076	A	G	A	G	-0.0074	0.0042	0.8716	0.8652	FALSE	FALSE	FALSE	xrxeCl	0.683	0.0102	IBS	TRUE	reported	textfile	0.0017	8.747e-06	7347	M01302.metal.pos.txt.gz	methionine	TRUE	reported	hfKj9T	2	TRUE	333768	0.00257239	18.9429
rs9410970	A	C	A	C	-0.0068	-0.006	0.2201	0.2143	FALSE	FALSE	FALSE	xrxeCl	0.4785	0.0084	IBS	TRUE	reported	textfile	0.0015	5.493e-06	7347	M01302.metal.pos.txt.gz	methionine	TRUE	reported	hfKj9T	2	TRUE	333768	0.00278941	20.5455
rs9598459	A	G	A	G	0.0079	-0.0019	0.896	0.8938	FALSE	FALSE	FALSE	xrxeCl	0.8636	0.0111	IBS	TRUE	reported	textfile	0.0017	5.172e-06	7347	M01302.metal.pos.txt.gz	methionine	TRUE	reported	hfKj9T	2	TRUE	333768	0.0029307	21.5893
rs10021069	T	C	T	C	0.0238	-0.0016	0.9663	0.9582	FALSE	FALSE	FALSE	UqrdDC	0.9264	0.0171	IBS	TRUE	reported	textfile	0.005	1.81e-06	7355	M01358.metal.pos.txt.gz	stearate (18:0)	TRUE	reported	HHOa8b	2	TRUE	333768	0.00307111	22.6514
rs10152773	T	C	T	C	-0.0224	0.0202	0.0425	0.0468	FALSE	FALSE	FALSE	UqrdDC	0.2164	0.0163	IBS	TRUE	reported	textfile	0.0049	4.733e-06	7355	M01358.metal.pos.txt.gz	stearate (18:0)	TRUE	reported	HHOa8b	2	TRUE	333768	0.00283328	20.8923
rs10160169	A	G	A	G	0.0084	0.0029	0.6329	0.6058	FALSE	FALSE	FALSE	UqrdDC	0.6787	0.007	IBS	TRUE	reported	textfile	0.0018	3.777e-06	7355	M01358.metal.pos.txt.gz	stearate (18:0)	TRUE	reported	HHOa8b	2	TRUE	333768	0.00295221	21.7719
rs10242171	A	G	A	G	-0.012	0.0157	0.1356	0.1405	FALSE	FALSE	FALSE	UqrdDC	0.1378	0.0106	IBS	TRUE	reported	textfile	0.0026	4.246e-06	7355	M01358.metal.pos.txt.gz	stearate (18:0)	TRUE	reported	HHOa8b	2	TRUE	333768	0.00288787	21.296
rs10498606	A	C	A	C	-0.0077	-0.0029	0.4534	0.4499	FALSE	FALSE	FALSE	UqrdDC	0.6731	0.0068	IBS	TRUE	reported	textfile	0.0017	6.402e-06	7355	M01358.metal.pos.txt.gz	stearate (18:0)	TRUE	reported	HHOa8b	2	TRUE	333768	0.00278158	20.51
rs1075227	T	C	T	C	0.009	-0.0013	0.552	0.5493	FALSE	FALSE	FALSE	UqrdDC	0.8506	0.0069	IBS	TRUE	reported	textfile	0.002	6.795e-06	5590	M01358.metal.pos.txt.gz	stearate (18:0)	TRUE	reported	HHOa8b	2	TRUE	333768	0.00360946	20.2428
rs10757839	T	C	T	C	0.0079	-0.0053	0.6521	0.6458	FALSE	FALSE	FALSE	UqrdDC	0.4646	0.0072	IBS	TRUE	reported	textfile	0.0017	4.739e-06	7355	M01358.metal.pos.txt.gz	stearate (18:0)	TRUE	reported	HHOa8b	2	TRUE	333768	0.00292752	21.5893
rs10853932	T	C	T	C	0.008	-0.0062	0.345	0.3538	FALSE	FALSE	FALSE	UqrdDC	0.3815	0.0071	IBS	TRUE	reported	textfile	0.0018	5.449e-06	7355	M01358.metal.pos.txt.gz	stearate (18:0)	TRUE	reported	HHOa8b	2	TRUE	333768	0.00267847	19.7477
rs11118120	A	C	A	C	-0.0121	-0.0017	0.8531	0.8513	FALSE	FALSE	FALSE	UqrdDC	0.8606	0.0098	IBS	TRUE	reported	textfile	0.0025	1.176e-06	7355	M01358.metal.pos.txt.gz	stearate (18:0)	TRUE	reported	HHOa8b	2	TRUE	333768	0.00317488	23.4192
rs11940037	T	C	T	C	0.0125	-0.0016	0.8408	0.82	FALSE	FALSE	FALSE	UqrdDC	0.8577	0.0088	IBS	TRUE	reported	textfile	0.0025	7.006e-07	7355	M01358.metal.pos.txt.gz	stearate (18:0)	TRUE	reported	HHOa8b	2	TRUE	333768	0.00338753	24.9932
rs12353451	A	G	A	G	-0.0223	-0.0074	0.0373	0.0474	FALSE	FALSE	FALSE	UqrdDC	0.6498	0.0164	IBS	TRUE	reported	textfile	0.0049	6.061e-06	7355	M01358.metal.pos.txt.gz	stearate (18:0)	TRUE	reported	HHOa8b	2	TRUE	333768	0.00280811	20.7062
rs1237044	T	C	T	C	0.0081	-0.0034	0.5836	0.5793	FALSE	FALSE	FALSE	UqrdDC	0.644	0.0074	IBS	TRUE	reported	textfile	0.0018	5.097e-06	7355	M01358.metal.pos.txt.gz	stearate (18:0)	TRUE	reported	HHOa8b	2	TRUE	333768	0.00274567	20.2445
rs13355979	A	G	A	G	-0.0076	-0.0007	0.5665	0.5655	FALSE	FALSE	FALSE	UqrdDC	0.9227	0.0069	IBS	TRUE	reported	textfile	0.0017	6.232e-06	7355	M01358.metal.pos.txt.gz	stearate (18:0)	TRUE	reported	HHOa8b	2	TRUE	333768	0.00270999	19.9807
rs1348656	T	C	T	C	-0.0137	0.0127	0.798	0.7991	FALSE	FALSE	FALSE	UqrdDC	0.1355	0.0085	IBS	TRUE	reported	textfile	0.0024	1.169e-08	7355	M01358.metal.pos.txt.gz	stearate (18:0)	TRUE	reported	HHOa8b	2	TRUE	333768	0.00441079	32.5762
rs1426441	A	G	A	G	0.0113	-0.016	0.1423	0.1662	FALSE	FALSE	FALSE	UqrdDC	0.08288	0.0092	IBS	TRUE	reported	textfile	0.0025	4.871e-06	7355	M01358.metal.pos.txt.gz	stearate (18:0)	TRUE	reported	HHOa8b	2	TRUE	333768	0.00277006	20.4248
rs1477025	T	C	T	C	0.0087	-0.0023	0.6547	0.6579	FALSE	FALSE	FALSE	UqrdDC	0.7467	0.0072	IBS	TRUE	reported	textfile	0.0017	4.828e-07	7355	M01358.metal.pos.txt.gz	stearate (18:0)	TRUE	reported	HHOa8b	2	TRUE	333768	0.00354825	26.1832
rs1662999	T	C	T	C	0.0079	0.003	0.6325	0.6207	FALSE	FALSE	FALSE	UqrdDC	0.6765	0.0071	IBS	TRUE	reported	textfile	0.0017	4.209e-06	7355	M01358.metal.pos.txt.gz	stearate (18:0)	TRUE	reported	HHOa8b	2	TRUE	333768	0.00292752	21.5893
rs1922419	A	G	A	G	-0.0182	0.0042	0.7807	0.7727	FALSE	FALSE	FALSE	UqrdDC	0.6123	0.0082	IBS	TRUE	reported	textfile	0.0039	3.365e-06	1765	M01358.metal.pos.txt.gz	stearate (18:0)	TRUE	reported	HHOa8b	2	TRUE	333768	0.0121883	21.7531
rs2100884	T	C	T	C	-0.0084	-0.0005	0.4375	0.444	FALSE	FALSE	FALSE	UqrdDC	0.9399	0.0069	IBS	TRUE	reported	textfile	0.0017	8.6e-07	7355	M01358.metal.pos.txt.gz	stearate (18:0)	TRUE	reported	HHOa8b	2	TRUE	333768	0.00330856	24.4086
rs2115366	T	C	T	C	-0.0079	-0.0002	0.4418	0.4364	FALSE	FALSE	FALSE	UqrdDC	0.9799	0.0069	IBS	TRUE	reported	textfile	0.0017	3.927e-06	7355	M01358.metal.pos.txt.gz	stearate (18:0)	TRUE	reported	HHOa8b	2	TRUE	333768	0.00292752	21.5893
rs216283	A	C	A	C	0.008	-0.0083	0.4171	0.4278	FALSE	FALSE	FALSE	UqrdDC	0.2849	0.0077	IBS	TRUE	reported	textfile	0.0017	2.631e-06	7355	M01358.metal.pos.txt.gz	stearate (18:0)	TRUE	reported	HHOa8b	2	TRUE	333768	0.00300188	22.1393
rs2280248	A	G	A	G	-0.0077	0.0012	0.4808	0.4839	FALSE	FALSE	FALSE	UqrdDC	0.8622	0.0068	IBS	TRUE	reported	textfile	0.0017	5.545e-06	7355	M01358.metal.pos.txt.gz	stearate (18:0)	TRUE	reported	HHOa8b	2	TRUE	333768	0.00278158	20.51
rs2489020	T	C	T	C	-0.0081	-0.0181	0.5262	0.5184	FALSE	FALSE	FALSE	UqrdDC	0.008254	0.0069	IBS	TRUE	reported	textfile	0.0017	2.3e-06	7355	M01358.metal.pos.txt.gz	stearate (18:0)	TRUE	reported	HHOa8b	2	TRUE	333768	0.00307717	22.6962
rs281216	T	G	T	G	0.0149	-0.0345	0.9187	0.9116	FALSE	FALSE	FALSE	UqrdDC	0.008214	0.013	IBS	TRUE	reported	textfile	0.0033	8.264e-06	7355	M01358.metal.pos.txt.gz	stearate (18:0)	TRUE	reported	HHOa8b	2	TRUE	333768	0.00276414	20.381
rs3087751	A	C	A	C	0.0078	-0.0007	0.423	0.4424	FALSE	FALSE	FALSE	UqrdDC	0.9165	0.007	IBS	TRUE	reported	textfile	0.0017	5.234e-06	7355	M01358.metal.pos.txt.gz	stearate (18:0)	TRUE	reported	HHOa8b	2	TRUE	333768	0.00285409	21.0462
rs3748771	T	G	T	G	-0.0671	0.0197	0.9877	0.9896	FALSE	FALSE	FALSE	UqrdDC	0.6244	0.0403	IBS	TRUE	reported	textfile	0.0149	6.346e-06	1765	M01358.metal.pos.txt.gz	stearate (18:0)	TRUE	reported	HHOa8b	2	TRUE	333768	0.0113597	20.2572
rs3793900	A	C	A	C	-0.0078	-0.0094	0.6337	0.642	FALSE	FALSE	FALSE	UqrdDC	0.1887	0.0072	IBS	TRUE	reported	textfile	0.0017	5.733e-06	7355	M01358.metal.pos.txt.gz	stearate (18:0)	TRUE	reported	HHOa8b	2	TRUE	333768	0.00285409	21.0462
rs3863373	A	C	A	C	-0.008	-0.0116	0.3335	0.3296	FALSE	FALSE	FALSE	UqrdDC	0.1095	0.0072	IBS	TRUE	reported	textfile	0.0017	4.205e-06	7355	M01358.metal.pos.txt.gz	stearate (18:0)	TRUE	reported	HHOa8b	2	TRUE	333768	0.00300188	22.1393
rs4420815	A	G	A	G	-0.014	0.0064	0.143	0.1491	FALSE	FALSE	FALSE	UqrdDC	0.5021	0.0096	IBS	TRUE	reported	textfile	0.003	3.061e-06	5590	M01358.metal.pos.txt.gz	stearate (18:0)	TRUE	reported	HHOa8b	2	TRUE	333768	0.00388073	21.77
rs4507103	A	G	A	G	0.0077	0.0055	0.397	0.3987	FALSE	FALSE	FALSE	UqrdDC	0.4414	0.0071	IBS	TRUE	reported	textfile	0.0017	6.893e-06	7355	M01358.metal.pos.txt.gz	stearate (18:0)	TRUE	reported	HHOa8b	2	TRUE	333768	0.00278158	20.51
rs4710948	A	G	A	G	-0.0085	0.008	0.3382	0.3504	FALSE	FALSE	FALSE	UqrdDC	0.2607	0.0071	IBS	TRUE	reported	textfile	0.0017	6.939e-07	7355	M01358.metal.pos.txt.gz	stearate (18:0)	TRUE	reported	HHOa8b	2	TRUE	333768	0.00338753	24.9932
rs4750059	C	G	C	G	-0.0134	0.0026	0.7956	0.7492	FALSE	TRUE	FALSE	UqrdDC	0.7588	0.0086	IBS	TRUE	reported	textfile	0.003	6.492e-06	7355	M01358.metal.pos.txt.gz	stearate (18:0)	TRUE	reported	HHOa8b	2	TRUE	333768	0.00270525	19.9457
rs603424	A	G	A	G	0.0225	-0.0092	0.1835	0.1711	FALSE	FALSE	FALSE	UqrdDC	0.3133	0.0091	IBS	TRUE	reported	textfile	0.0024	6.064e-21	7355	M01358.metal.pos.txt.gz	stearate (18:0)	TRUE	reported	HHOa8b	2	TRUE	333768	0.0118087	87.8667
rs6453594	A	G	A	G	-0.0108	0.0053	0.2196	0.2397	FALSE	FALSE	FALSE	UqrdDC	0.5081	0.008	IBS	TRUE	reported	textfile	0.0024	7.008e-06	7355	M01358.metal.pos.txt.gz	stearate (18:0)	TRUE	reported	HHOa8b	2	TRUE	333768	0.00274567	20.2445
rs6733405	A	G	A	G	-0.0082	0.0091	0.3867	0.3789	FALSE	FALSE	FALSE	UqrdDC	0.1964	0.0071	IBS	TRUE	reported	textfile	0.0017	2.415e-06	7355	M01358.metal.pos.txt.gz	stearate (18:0)	TRUE	reported	HHOa8b	2	TRUE	333768	0.00315337	23.2601
rs6883481	T	C	T	C	0.0077	-0.0093	0.4737	0.4793	FALSE	FALSE	FALSE	UqrdDC	0.1779	0.0069	IBS	TRUE	reported	textfile	0.0017	6.17e-06	7355	M01358.metal.pos.txt.gz	stearate (18:0)	TRUE	reported	HHOa8b	2	TRUE	333768	0.00278158	20.51
rs727892	A	G	A	G	0.0083	-0.0006	0.5021	0.5089	FALSE	FALSE	FALSE	UqrdDC	0.9308	0.0069	IBS	TRUE	reported	textfile	0.0017	8.15e-07	7355	M01358.metal.pos.txt.gz	stearate (18:0)	TRUE	reported	HHOa8b	2	TRUE	333768	0.0032305	23.8309
rs7583745	T	C	T	C	-0.0262	0.0082	0.8839	0.9031	FALSE	FALSE	FALSE	UqrdDC	0.4742	0.0115	IBS	TRUE	reported	textfile	0.0055	1.487e-06	1765	M01358.metal.pos.txt.gz	stearate (18:0)	TRUE	reported	HHOa8b	2	TRUE	333768	0.0126936	22.6665
rs7681360	A	G	A	G	0.0078	-0.0072	0.5825	0.5808	FALSE	FALSE	FALSE	UqrdDC	0.3188	0.0072	IBS	TRUE	reported	textfile	0.0017	4.186e-06	7355	M01358.metal.pos.txt.gz	stearate (18:0)	TRUE	reported	HHOa8b	2	TRUE	333768	0.00285409	21.0462
rs7996008	A	G	A	G	0.0079	-0.0147	0.2935	0.2983	FALSE	FALSE	FALSE	UqrdDC	0.0472	0.0074	IBS	TRUE	reported	textfile	0.0017	5.685e-06	7355	M01358.metal.pos.txt.gz	stearate (18:0)	TRUE	reported	HHOa8b	2	TRUE	333768	0.00292752	21.5893
rs954820	A	G	A	G	0.0083	-0.0078	0.5619	0.553	FALSE	FALSE	FALSE	UqrdDC	0.2805	0.0072	IBS	TRUE	reported	textfile	0.0018	2.57e-06	7355	M01358.metal.pos.txt.gz	stearate (18:0)	TRUE	reported	HHOa8b	2	TRUE	333768	0.00288254	21.2566
rs9568232	T	C	T	C	0.0126	-0.005	0.1152	0.0661	FALSE	FALSE	FALSE	UqrdDC	0.7142	0.0138	IBS	TRUE	reported	textfile	0.0028	5.056e-06	7355	M01358.metal.pos.txt.gz	stearate (18:0)	TRUE	reported	HHOa8b	2	TRUE	333768	0.00274567	20.2445
rs9809122	A	G	A	G	-0.0087	-0.0018	0.5295	0.5264	FALSE	FALSE	FALSE	UqrdDC	0.7922	0.0068	IBS	TRUE	reported	textfile	0.0017	3.924e-07	7355	M01358.metal.pos.txt.gz	stearate (18:0)	TRUE	reported	HHOa8b	2	TRUE	333768	0.00354825	26.1832
rs10922038	T	C	T	C	0.0102	-0.01	0.4354	0.4414	FALSE	FALSE	FALSE	RoewyC	0.1459	0.0069	IBS	TRUE	reported	textfile	0.0023	7.569e-06	7104	M01638.metal.pos.txt.gz	arginine	TRUE	reported	JAqP2H	2	TRUE	333768	0.00276084	19.6618
rs11114987	T	C	T	C	-0.0324	-0.0111	0.0439	0.0451	FALSE	FALSE	FALSE	RoewyC	0.524	0.0175	IBS	TRUE	reported	textfile	0.0067	1.414e-06	7104	M01638.metal.pos.txt.gz	arginine	TRUE	reported	JAqP2H	2	TRUE	333768	0.00328103	23.3786
rs1153903	A	G	A	G	-0.0106	0.0026	0.3856	0.4022	FALSE	FALSE	FALSE	RoewyC	0.7122	0.0069	IBS	TRUE	reported	textfile	0.0023	4.187e-06	7104	M01638.metal.pos.txt.gz	arginine	TRUE	reported	JAqP2H	2	TRUE	333768	0.00298096	21.2341
rs12714263	A	G	A	G	-0.0107	-0.0021	0.5733	0.5723	FALSE	FALSE	FALSE	RoewyC	0.7568	0.0069	IBS	TRUE	reported	textfile	0.0023	3.976e-06	7104	M01638.metal.pos.txt.gz	arginine	TRUE	reported	JAqP2H	2	TRUE	333768	0.0030373	21.6366
rs12985777	T	C	T	C	-0.0141	0.0057	0.2402	0.2453	FALSE	FALSE	FALSE	RoewyC	0.5096	0.0087	IBS	TRUE	reported	textfile	0.0032	8.861e-06	7104	M01638.metal.pos.txt.gz	arginine	TRUE	reported	JAqP2H	2	TRUE	333768	0.00272552	19.4096
rs17706531	A	G	A	G	0.0105	0.0028	0.6331	0.6315	FALSE	FALSE	FALSE	RoewyC	0.6905	0.007	IBS	TRUE	reported	textfile	0.0023	6.973e-06	7104	M01638.metal.pos.txt.gz	arginine	TRUE	reported	JAqP2H	2	TRUE	333768	0.00292515	20.8353
rs2180566	T	C	T	C	-0.0109	-0.0023	0.6433	0.6442	FALSE	FALSE	FALSE	RoewyC	0.7527	0.0075	IBS	TRUE	reported	textfile	0.0023	2.105e-06	7104	M01638.metal.pos.txt.gz	arginine	TRUE	reported	JAqP2H	2	TRUE	333768	0.00315154	22.453
rs2246012	T	C	T	C	-0.0166	-0.0119	0.8388	0.8318	FALSE	FALSE	FALSE	RoewyC	0.1942	0.0092	IBS	TRUE	reported	textfile	0.0032	2.227e-07	7104	M01638.metal.pos.txt.gz	arginine	TRUE	reported	JAqP2H	2	TRUE	333768	0.00377373	26.9026
rs2916148	A	G	A	G	-0.0101	-0.0035	0.4534	0.4505	FALSE	FALSE	FALSE	RoewyC	0.618	0.0069	IBS	TRUE	reported	textfile	0.0023	9.235e-06	7104	M01638.metal.pos.txt.gz	arginine	TRUE	reported	JAqP2H	2	TRUE	333768	0.00270712	19.2781
rs2933871	A	G	A	G	0.0178	0.019	0.6938	0.7082	FALSE	FALSE	FALSE	RoewyC	0.01088	0.0075	IBS	TRUE	reported	textfile	0.004	7.648e-06	1735	M01638.metal.pos.txt.gz	arginine	TRUE	reported	JAqP2H	2	TRUE	333768	0.0112847	19.7797
rs3011362	A	G	A	G	-0.0349	-0.0082	0.0334	0.0445	FALSE	FALSE	FALSE	RoewyC	0.6213	0.0165	IBS	TRUE	reported	textfile	0.0074	2.37e-06	1735	M01638.metal.pos.txt.gz	arginine	TRUE	reported	JAqP2H	2	TRUE	333768	0.0126577	22.2171
rs511304	A	C	A	C	0.0191	0.0062	0.4368	0.4382	FALSE	FALSE	FALSE	RoewyC	0.3887	0.0072	IBS	TRUE	reported	textfile	0.0039	1.014e-06	1735	M01638.metal.pos.txt.gz	arginine	TRUE	reported	JAqP2H	2	TRUE	333768	0.0136356	23.9572
rs6479442	A	C	A	C	0.0101	0.0053	0.4837	0.49	FALSE	FALSE	FALSE	RoewyC	0.433	0.0068	IBS	TRUE	reported	textfile	0.0023	9.586e-06	7104	M01638.metal.pos.txt.gz	arginine	TRUE	reported	JAqP2H	2	TRUE	333768	0.00270712	19.2781
rs6920504	T	C	T	C	-0.0135	-0.0086	0.7729	0.7529	FALSE	FALSE	FALSE	RoewyC	0.2799	0.0079	IBS	TRUE	reported	textfile	0.003	7.527e-06	7104	M01638.metal.pos.txt.gz	arginine	TRUE	reported	JAqP2H	2	TRUE	333768	0.0028424	20.2443
rs7036499	T	C	T	C	0.0217	0.0166	0.8519	0.851	FALSE	FALSE	FALSE	RoewyC	0.08497	0.0096	IBS	TRUE	reported	textfile	0.0049	8.857e-06	1735	M01638.metal.pos.txt.gz	arginine	TRUE	reported	JAqP2H	2	TRUE	333768	0.0111775	19.5896
rs715	T	C	T	C	0.0144	-0.013	0.7064	0.6887	FALSE	FALSE	FALSE	RoewyC	0.0854	0.0075	IBS	TRUE	reported	textfile	0.0028	2.902e-07	7104	M01638.metal.pos.txt.gz	arginine	TRUE	reported	JAqP2H	2	TRUE	333768	0.0037093	26.4415
rs720118	T	C	T	C	-0.0105	-0.005	0.6152	0.6212	FALSE	FALSE	FALSE	RoewyC	0.4778	0.007	IBS	TRUE	reported	textfile	0.0023	4.547e-06	7104	M01638.metal.pos.txt.gz	arginine	TRUE	reported	JAqP2H	2	TRUE	333768	0.00292515	20.8353
rs7535809	A	G	A	G	0.0138	-0.0035	0.8331	0.842	FALSE	FALSE	FALSE	RoewyC	0.7103	0.0094	IBS	TRUE	reported	textfile	0.0031	7.276e-06	7104	M01638.metal.pos.txt.gz	arginine	TRUE	reported	JAqP2H	2	TRUE	333768	0.00278178	19.8113
rs7717247	A	C	A	C	0.0162	0.0026	0.8061	0.8342	FALSE	FALSE	FALSE	RoewyC	0.7774	0.0094	IBS	TRUE	reported	textfile	0.0035	3.347e-06	7104	M01638.metal.pos.txt.gz	arginine	TRUE	reported	JAqP2H	2	TRUE	333768	0.00300665	21.4176
rs837763	T	C	T	C	0.0114	0.006	0.5528	0.5567	FALSE	FALSE	FALSE	RoewyC	0.3966	0.0071	IBS	TRUE	reported	textfile	0.0025	6.027e-06	7104	M01638.metal.pos.txt.gz	arginine	TRUE	reported	JAqP2H	2	TRUE	333768	0.00291848	20.7877
rs901272	A	C	A	C	-0.0105	-0.015	0.6207	0.6116	FALSE	FALSE	FALSE	RoewyC	0.03114	0.007	IBS	TRUE	reported	textfile	0.0023	6.493e-06	7104	M01638.metal.pos.txt.gz	arginine	TRUE	reported	JAqP2H	2	TRUE	333768	0.00292515	20.8353
rs10050054	T	C	T	C	-0.0336	0.0399	0.9828	0.9834	FALSE	FALSE	FALSE	Y9CDZM	0.1564	0.0282	IBS	TRUE	reported	textfile	0.0072	3.177e-06	1763	M01649.metal.pos.txt.gz	valine	TRUE	reported	3iJxkY	2	TRUE	333768	0.012202	21.7531
rs10181551	A	G	A	G	-0.0055	0.0089	0.296	0.2937	FALSE	FALSE	FALSE	Y9CDZM	0.2336	0.0075	IBS	TRUE	reported	textfile	0.0012	3.876e-06	7359	M01649.metal.pos.txt.gz	valine	TRUE	reported	3iJxkY	2	TRUE	333768	0.00284647	21.0012
rs12552913	A	T	A	T	-0.0059	-0.0014	0.2932	0.2946	FALSE	TRUE	FALSE	Y9CDZM	0.8576	0.0076	IBS	TRUE	reported	textfile	0.0012	1.164e-06	7359	M01649.metal.pos.txt.gz	valine	TRUE	reported	3iJxkY	2	TRUE	333768	0.00327415	24.167
rs1440581	T	C	T	C	-0.0081	0.0084	0.4577	0.4685	FALSE	FALSE	FALSE	Y9CDZM	0.2164	0.0068	IBS	TRUE	reported	textfile	0.0012	2.558e-12	7359	M01649.metal.pos.txt.gz	valine	TRUE	reported	3iJxkY	2	TRUE	333768	0.0061533	45.5501
rs2373642	A	G	A	G	-0.054	0.024	0.0138	0.035	FALSE	FALSE	FALSE	Y9CDZM	0.2527	0.021	IBS	TRUE	reported	textfile	0.011	9.775e-07	1763	M01649.metal.pos.txt.gz	valine	TRUE	reported	3iJxkY	2	TRUE	333768	0.0134851	24.0718
rs3762466	T	C	T	C	0.0058	-0.0027	0.6819	0.6687	FALSE	FALSE	FALSE	Y9CDZM	0.72	0.0076	IBS	TRUE	reported	textfile	0.0012	1.063e-06	7359	M01649.metal.pos.txt.gz	valine	TRUE	reported	3iJxkY	2	TRUE	333768	0.00316445	23.3548
rs10516056	T	C	T	C	-0.0222	0.008	0.1978	0.205	FALSE	FALSE	FALSE	dROXlk	0.4034	0.0096	IBS	TRUE	reported	textfile	0.0045	6.992e-07	5791	M02342.metal.pos.txt.gz	serotonin (5HT)	TRUE	reported	wH3wNZ	2	TRUE	333768	0.0041851	24.3294
rs10881427	T	G	T	G	-0.015	-0.0071	0.5558	0.5547	FALSE	FALSE	FALSE	dROXlk	0.2999	0.0069	IBS	TRUE	reported	textfile	0.0032	3.688e-06	5791	M02342.metal.pos.txt.gz	serotonin (5HT)	TRUE	reported	wH3wNZ	2	TRUE	333768	0.00377993	21.9651
rs10953038	T	C	T	C	0.022	-0.013	0.8497	0.8457	FALSE	FALSE	FALSE	dROXlk	0.1672	0.0094	IBS	TRUE	reported	textfile	0.0048	4.116e-06	5791	M02342.metal.pos.txt.gz	serotonin (5HT)	TRUE	reported	wH3wNZ	2	TRUE	333768	0.0036144	20.9997
rs11781043	T	C	T	C	-0.0187	-0.0002	0.6731	0.6247	FALSE	FALSE	FALSE	dROXlk	0.9728	0.0072	IBS	TRUE	reported	textfile	0.0042	8.808e-06	5791	M02342.metal.pos.txt.gz	serotonin (5HT)	TRUE	reported	wH3wNZ	2	TRUE	333768	0.00341151	19.8168
rs12646122	T	C	T	C	-0.0497	-0.013	0.0308	0.0226	FALSE	FALSE	FALSE	dROXlk	0.5879	0.0239	IBS	TRUE	reported	textfile	0.0104	1.802e-06	5791	M02342.metal.pos.txt.gz	serotonin (5HT)	TRUE	reported	wH3wNZ	2	TRUE	333768	0.00392811	22.8295
rs17708932	A	G	A	G	-0.0766	-0.0273	0.0376	0.0531	FALSE	FALSE	FALSE	dROXlk	0.1132	0.0172	IBS	TRUE	reported	textfile	0.0171	7.215e-06	1741	M02342.metal.pos.txt.gz	serotonin (5HT)	TRUE	reported	wH3wNZ	2	TRUE	333768	0.0113944	20.0432
rs2036136	T	C	T	C	-0.0256	-0.0049	0.4587	0.4272	FALSE	FALSE	FALSE	dROXlk	0.478	0.0069	IBS	TRUE	reported	textfile	0.0056	5.114e-06	1741	M02342.metal.pos.txt.gz	serotonin (5HT)	TRUE	reported	wH3wNZ	2	TRUE	333768	0.011861	20.874
rs2742351	C	G	C	G	-0.0235	0.0011	0.2209	0.2763	FALSE	TRUE	FALSE	dROXlk	0.8894	0.0077	IBS	TRUE	reported	textfile	0.0046	3.227e-07	5791	M02342.metal.pos.txt.gz	serotonin (5HT)	TRUE	reported	wH3wNZ	2	TRUE	333768	0.00448656	26.0898
rs3753556	T	C	T	C	0.015	-0.0007	0.4325	0.4321	FALSE	FALSE	FALSE	dROXlk	0.9181	0.0069	IBS	TRUE	reported	textfile	0.0032	3.663e-06	5791	M02342.metal.pos.txt.gz	serotonin (5HT)	TRUE	reported	wH3wNZ	2	TRUE	333768	0.00377993	21.9651
rs5764174	T	C	T	C	-0.0194	-0.0114	0.2445	0.2442	FALSE	FALSE	FALSE	dROXlk	0.1498	0.0079	IBS	TRUE	reported	textfile	0.004	9.608e-07	5791	M02342.metal.pos.txt.gz	serotonin (5HT)	TRUE	reported	wH3wNZ	2	TRUE	333768	0.00404547	23.5144
rs6466265	A	G	A	G	0.0186	0.0084	0.7977	0.7999	FALSE	FALSE	FALSE	dROXlk	0.3258	0.0086	IBS	TRUE	reported	textfile	0.004	4.146e-06	5791	M02342.metal.pos.txt.gz	serotonin (5HT)	TRUE	reported	wH3wNZ	2	TRUE	333768	0.00371992	21.615
rs7868774	A	G	A	G	-0.0188	-0.0096	0.2709	0.2639	FALSE	FALSE	FALSE	dROXlk	0.2516	0.0084	IBS	TRUE	reported	textfile	0.0039	1.779e-06	5791	M02342.metal.pos.txt.gz	serotonin (5HT)	TRUE	reported	wH3wNZ	2	TRUE	333768	0.00399663	23.2293
rs8113773	A	G	A	G	0.016	-0.0007	0.5616	0.5528	FALSE	FALSE	FALSE	dROXlk	0.9222	0.0069	IBS	TRUE	reported	textfile	0.0033	1.117e-06	5791	M02342.metal.pos.txt.gz	serotonin (5HT)	TRUE	reported	wH3wNZ	2	TRUE	333768	0.00404296	23.4997
rs825278	T	C	T	C	-0.0913	-0.0675	0.0201	0.0149	FALSE	FALSE	FALSE	dROXlk	0.02505	0.0301	IBS	TRUE	reported	textfile	0.0192	2.062e-06	1741	M02342.metal.pos.txt.gz	serotonin (5HT)	TRUE	reported	wH3wNZ	2	TRUE	333768	0.0128214	22.586
rs988694	A	G	A	G	-0.0145	-0.0063	0.477	0.4936	FALSE	FALSE	FALSE	dROXlk	0.3581	0.0068	IBS	TRUE	reported	textfile	0.0033	8.39e-06	5791	M02342.metal.pos.txt.gz	serotonin (5HT)	TRUE	reported	wH3wNZ	2	TRUE	333768	0.00332284	19.3
rs9953702	A	G	A	G	0.0146	0.0027	0.3601	0.362	FALSE	FALSE	FALSE	dROXlk	0.7028	0.0071	IBS	TRUE	reported	textfile	0.0033	9.22e-06	5791	M02342.metal.pos.txt.gz	serotonin (5HT)	TRUE	reported	wH3wNZ	2	TRUE	333768	0.00336867	19.5672
rs10159475	A	G	A	G	0.0157	-0.0229	0.8276	0.8063	FALSE	FALSE	FALSE	V3E7ff	0.007649	0.0086	IBS	TRUE	reported	textfile	0.0034	4.094e-06	6939	M18349.metal.pos.txt.gz	indolelactate	TRUE	reported	7pBT21	2	TRUE	333768	0.00306346	21.3165
rs1055689	A	G	A	G	-0.0135	-0.0016	0.2969	0.3066	FALSE	FALSE	FALSE	V3E7ff	0.8268	0.0074	IBS	TRUE	reported	textfile	0.0027	4.261e-07	6939	M18349.metal.pos.txt.gz	indolelactate	TRUE	reported	7pBT21	2	TRUE	333768	0.00358989	24.9928
rs10759811	A	T	A	T	-0.0119	0.0017	0.653	0.6665	FALSE	TRUE	FALSE	V3E7ff	0.8169	0.0072	IBS	TRUE	reported	textfile	0.0027	7.025e-06	6939	M18349.metal.pos.txt.gz	indolelactate	TRUE	reported	7pBT21	2	TRUE	333768	0.00279161	19.4196
rs11623441	T	C	T	C	0.0121	0.0012	0.6919	0.6893	FALSE	FALSE	FALSE	V3E7ff	0.8674	0.0074	IBS	TRUE	reported	textfile	0.0027	7.84e-06	6939	M18349.metal.pos.txt.gz	indolelactate	TRUE	reported	7pBT21	2	TRUE	333768	0.00288597	20.0779
rs11647808	A	C	A	C	0.0249	0.006	0.0735	0.0855	FALSE	FALSE	FALSE	V3E7ff	0.6241	0.0122	IBS	TRUE	reported	textfile	0.0051	8.569e-07	6939	M18349.metal.pos.txt.gz	indolelactate	TRUE	reported	7pBT21	2	TRUE	333768	0.00342351	23.8305
rs12526522	T	C	T	C	-0.0369	0.0007	0.0349	0.0549	FALSE	FALSE	FALSE	V3E7ff	0.9641	0.0152	IBS	TRUE	reported	textfile	0.0078	2.553e-06	6939	M18349.metal.pos.txt.gz	indolelactate	TRUE	reported	7pBT21	2	TRUE	333768	0.00321491	22.3737
rs12880087	A	C	A	C	-0.0192	0.0082	0.1577	0.0777	FALSE	FALSE	FALSE	V3E7ff	0.5189	0.0127	IBS	TRUE	reported	textfile	0.0043	9.897e-06	6939	M18349.metal.pos.txt.gz	indolelactate	TRUE	reported	7pBT21	2	TRUE	333768	0.00286499	19.9315
rs15676	A	G	A	G	0.0191	0.0011	0.7123	0.717	FALSE	FALSE	FALSE	V3E7ff	0.8809	0.0076	IBS	TRUE	reported	textfile	0.0027	1.326e-12	6939	M18349.metal.pos.txt.gz	indolelactate	TRUE	reported	7pBT21	2	TRUE	333768	0.00716014	50.0281
rs17073667	A	G	A	G	0.0856	-0.0299	0.023	0.0211	FALSE	FALSE	FALSE	V3E7ff	0.2221	0.0245	IBS	TRUE	reported	textfile	0.018	1.842e-06	1492	M18349.metal.pos.txt.gz	indolelactate	TRUE	reported	7pBT21	2	TRUE	333768	0.0149314	22.585
rs2511986	C	G	C	G	0.0153	-0.0002	0.7684	0.7642	FALSE	TRUE	FALSE	V3E7ff	0.9838	0.0082	IBS	TRUE	reported	textfile	0.0034	7.625e-06	6939	M18349.metal.pos.txt.gz	indolelactate	TRUE	reported	7pBT21	2	TRUE	333768	0.0029098	20.2442
rs2689672	T	G	T	G	0.0119	0.0022	0.7286	0.7338	FALSE	FALSE	FALSE	V3E7ff	0.7698	0.0077	IBS	TRUE	reported	textfile	0.0027	9.5e-06	6939	M18349.metal.pos.txt.gz	indolelactate	TRUE	reported	7pBT21	2	TRUE	333768	0.00279161	19.4196
rs2932525	A	G	A	G	-0.0157	0.0038	0.8432	0.8498	FALSE	FALSE	FALSE	V3E7ff	0.6897	0.0096	IBS	TRUE	reported	textfile	0.0035	7.552e-06	6939	M18349.metal.pos.txt.gz	indolelactate	TRUE	reported	7pBT21	2	TRUE	333768	0.0028914	20.1158
rs314707	A	G	A	G	-0.0159	0.0056	0.8305	0.8289	FALSE	FALSE	FALSE	V3E7ff	0.5342	0.0091	IBS	TRUE	reported	textfile	0.0035	4.433e-06	6939	M18349.metal.pos.txt.gz	indolelactate	TRUE	reported	7pBT21	2	TRUE	333768	0.00296532	20.6316
rs4719964	A	G	A	G	-0.0123	-0.0045	0.2554	0.2587	FALSE	FALSE	FALSE	V3E7ff	0.5637	0.0078	IBS	TRUE	reported	textfile	0.0027	4.459e-06	6939	M18349.metal.pos.txt.gz	indolelactate	TRUE	reported	7pBT21	2	TRUE	333768	0.00298187	20.7471
rs6910570	A	G	A	G	0.0125	-0.0078	0.5538	0.5489	FALSE	FALSE	FALSE	V3E7ff	0.2577	0.0069	IBS	TRUE	reported	textfile	0.0026	1.842e-06	6939	M18349.metal.pos.txt.gz	indolelactate	TRUE	reported	7pBT21	2	TRUE	333768	0.00331996	23.1072
rs7503709	T	C	T	C	-0.0129	-0.0075	0.4574	0.4517	FALSE	FALSE	FALSE	V3E7ff	0.3071	0.0074	IBS	TRUE	reported	textfile	0.0028	3.302e-06	6939	M18349.metal.pos.txt.gz	indolelactate	TRUE	reported	7pBT21	2	TRUE	333768	0.00304958	21.2196
rs7727858	A	G	A	G	-0.0205	0.0102	0.8891	0.8898	FALSE	FALSE	FALSE	V3E7ff	0.3489	0.0109	IBS	TRUE	reported	textfile	0.0042	1.077e-06	6939	M18349.metal.pos.txt.gz	indolelactate	TRUE	reported	7pBT21	2	TRUE	333768	0.00342156	23.8168
rs7805747	A	G	A	G	0.0131	-0.0118	0.2679	0.2746	FALSE	FALSE	FALSE	V3E7ff	0.1252	0.0077	IBS	TRUE	reported	textfile	0.0028	3.769e-06	6939	M18349.metal.pos.txt.gz	indolelactate	TRUE	reported	7pBT21	2	TRUE	333768	0.00314457	21.8827
rs940008	A	G	A	G	0.0251	-0.0113	0.4416	0.4591	FALSE	FALSE	FALSE	V3E7ff	0.09977	0.0068	IBS	TRUE	reported	textfile	0.0054	2.636e-06	1492	M18349.metal.pos.txt.gz	indolelactate	TRUE	reported	7pBT21	2	TRUE	333768	0.0142741	21.5763
rs10738265	T	C	T	C	0.0354	-0.0018	0.1746	0.178	FALSE	FALSE	FALSE	liqmo9	0.8389	0.0089	IBS	TRUE	reported	textfile	0.0073	1.133e-06	5624	M18476.metal.pos.txt.gz	glycocholate	TRUE	reported	2INybv	2	TRUE	333768	0.00416393	23.5075
rs12590118	T	G	T	G	-0.0463	-0.0048	0.9201	0.9223	FALSE	FALSE	FALSE	liqmo9	0.7068	0.0127	IBS	TRUE	reported	textfile	0.01	3.838e-06	5624	M18476.metal.pos.txt.gz	glycocholate	TRUE	reported	2INybv	2	TRUE	333768	0.00379721	21.4293
rs17107026	T	C	T	C	-0.0781	0.0135	0.9608	0.9645	FALSE	FALSE	FALSE	liqmo9	0.4915	0.0196	IBS	TRUE	reported	textfile	0.016	1.084e-06	5624	M18476.metal.pos.txt.gz	glycocholate	TRUE	reported	2INybv	2	TRUE	333768	0.00421872	23.8181
rs17807835	A	G	A	G	0.0343	-0.0047	0.8027	0.7991	FALSE	FALSE	FALSE	liqmo9	0.5811	0.0086	IBS	TRUE	reported	textfile	0.0072	1.71e-06	5624	M18476.metal.pos.txt.gz	glycocholate	TRUE	reported	2INybv	2	TRUE	333768	0.0040191	22.6866
rs2718107	A	C	A	C	0.0257	-0.0045	0.5408	0.5446	FALSE	FALSE	FALSE	liqmo9	0.5189	0.0069	IBS	TRUE	reported	textfile	0.0057	5.85e-06	5624	M18476.metal.pos.txt.gz	glycocholate	TRUE	reported	2INybv	2	TRUE	333768	0.00360167	20.3218
rs3807360	A	G	A	G	0.0735	-0.0101	0.2011	0.2038	FALSE	FALSE	FALSE	liqmo9	0.2329	0.0085	IBS	TRUE	reported	textfile	0.0164	7.436e-06	1157	M18476.metal.pos.txt.gz	glycocholate	TRUE	reported	2INybv	2	TRUE	333768	0.0170639	20.051
rs7837471	A	G	A	G	0.3403	-0.0307	0.015	0.0273	FALSE	FALSE	FALSE	liqmo9	0.1631	0.022	IBS	TRUE	reported	textfile	0.0731	3.273e-06	1157	M18476.metal.pos.txt.gz	glycocholate	TRUE	reported	2INybv	2	TRUE	333768	0.0183864	21.634
rs795543	T	C	T	C	-0.025	0.0027	0.4091	0.41	FALSE	FALSE	FALSE	liqmo9	0.7055	0.0071	IBS	TRUE	reported	textfile	0.0055	5.185e-06	5624	M18476.metal.pos.txt.gz	glycocholate	TRUE	reported	2INybv	2	TRUE	333768	0.0036603	20.6538
rs9914239	A	G	A	G	-0.1056	0.0123	0.9123	0.9208	FALSE	FALSE	FALSE	liqmo9	0.3293	0.0126	IBS	TRUE	reported	textfile	0.0228	3.637e-06	1157	M18476.metal.pos.txt.gz	glycocholate	TRUE	reported	2INybv	2	TRUE	333768	0.0182031	21.4144
rs10508432	A	G	A	G	-0.0124	-0.0091	0.7069	0.7109	FALSE	FALSE	FALSE	9UD0Uh	0.2273	0.0075	IBS	TRUE	reported	textfile	0.0027	4.069e-06	7301	M20675.metal.pos.txt.gz	1,5-anhydroglucitol (1,5-AG)	TRUE	reported	G5tXhy	2	TRUE	333768	0.00288058	21.0861
rs10746431	A	G	A	G	0.0558	0.0192	0.9808	0.9792	FALSE	FALSE	FALSE	9UD0Uh	0.4676	0.0264	IBS	TRUE	reported	textfile	0.0111	5.096e-07	7301	M20675.metal.pos.txt.gz	1,5-anhydroglucitol (1,5-AG)	TRUE	reported	G5tXhy	2	TRUE	333768	0.00344937	25.2641
rs1131718	A	G	A	G	-0.0166	0.0164	0.8565	0.8544	FALSE	FALSE	FALSE	9UD0Uh	0.114	0.0104	IBS	TRUE	reported	textfile	0.0037	5.711e-06	7301	M20675.metal.pos.txt.gz	1,5-anhydroglucitol (1,5-AG)	TRUE	reported	G5tXhy	2	TRUE	333768	0.00274938	20.123
rs11564708	C	G	C	G	0.0155	-0.0115	0.8162	0.798	FALSE	TRUE	FALSE	9UD0Uh	0.1932	0.0088	IBS	TRUE	reported	textfile	0.0034	6.395e-06	7301	M20675.metal.pos.txt.gz	1,5-anhydroglucitol (1,5-AG)	TRUE	reported	G5tXhy	2	TRUE	333768	0.0028385	20.7772
rs11580613	T	C	T	C	0.0188	-0.0062	0.1344	0.1544	FALSE	FALSE	FALSE	9UD0Uh	0.5123	0.0095	IBS	TRUE	reported	textfile	0.0042	8.682e-06	7301	M20675.metal.pos.txt.gz	1,5-anhydroglucitol (1,5-AG)	TRUE	reported	G5tXhy	2	TRUE	333768	0.00273681	20.0308
rs11722368	T	C	T	C	0.013	0.0035	0.3602	0.3492	FALSE	FALSE	FALSE	9UD0Uh	0.6257	0.0071	IBS	TRUE	reported	textfile	0.0027	1.032e-06	7301	M20675.metal.pos.txt.gz	1,5-anhydroglucitol (1,5-AG)	TRUE	reported	G5tXhy	2	TRUE	333768	0.00316519	23.1761
rs12465802	A	G	A	G	-0.0364	0.0089	0.31	0.2669	FALSE	FALSE	FALSE	9UD0Uh	0.3195	0.0089	IBS	TRUE	reported	textfile	0.0032	3.466e-29	7301	M20675.metal.pos.txt.gz	1,5-anhydroglucitol (1,5-AG)	TRUE	reported	G5tXhy	2	TRUE	333768	0.0174137	129.355
rs12603532	T	C	T	C	-0.0368	0.0256	0.0394	0.0587	FALSE	FALSE	FALSE	9UD0Uh	0.09508	0.0153	IBS	TRUE	reported	textfile	0.0074	6.622e-07	7301	M20675.metal.pos.txt.gz	1,5-anhydroglucitol (1,5-AG)	TRUE	reported	G5tXhy	2	TRUE	333768	0.00337584	24.7237
rs12677067	A	G	A	G	-0.015	-0.0057	0.29	0.3397	FALSE	FALSE	FALSE	9UD0Uh	0.4298	0.0072	IBS	TRUE	reported	textfile	0.0033	5.512e-06	7301	M20675.metal.pos.txt.gz	1,5-anhydroglucitol (1,5-AG)	TRUE	reported	G5tXhy	2	TRUE	333768	0.00282192	20.6555
rs1472578	A	T	A	T	-0.0126	-0.0039	0.6894	0.687	FALSE	TRUE	FALSE	9UD0Uh	0.592	0.0073	IBS	TRUE	reported	textfile	0.0027	2.441e-06	7301	M20675.metal.pos.txt.gz	1,5-anhydroglucitol (1,5-AG)	TRUE	reported	G5tXhy	2	TRUE	333768	0.00297398	21.7718
rs1499686	A	G	A	G	-0.0174	0.0212	0.8079	0.8157	FALSE	FALSE	FALSE	9UD0Uh	0.01664	0.0089	IBS	TRUE	reported	textfile	0.0035	7.494e-07	7301	M20675.metal.pos.txt.gz	1,5-anhydroglucitol (1,5-AG)	TRUE	reported	G5tXhy	2	TRUE	333768	0.00337375	24.7083
rs1545472	A	G	A	G	0.0118	-0.0046	0.5158	0.517	FALSE	FALSE	FALSE	9UD0Uh	0.5086	0.007	IBS	TRUE	reported	textfile	0.0027	9.22e-06	7301	M20675.metal.pos.txt.gz	1,5-anhydroglucitol (1,5-AG)	TRUE	reported	G5tXhy	2	TRUE	333768	0.00260927	19.0949
rs1687134	T	C	T	C	0.0289	-0.0041	0.7206	0.7216	FALSE	FALSE	FALSE	9UD0Uh	0.5957	0.0078	IBS	TRUE	reported	textfile	0.006	1.583e-06	1747	M20675.metal.pos.txt.gz	1,5-anhydroglucitol (1,5-AG)	TRUE	reported	G5tXhy	2	TRUE	333768	0.013106	23.1737
rs17212491	A	G	A	G	0.016	-0.0046	0.1645	0.1671	FALSE	FALSE	FALSE	9UD0Uh	0.6147	0.0091	IBS	TRUE	reported	textfile	0.0035	5.926e-06	7301	M20675.metal.pos.txt.gz	1,5-anhydroglucitol (1,5-AG)	TRUE	reported	G5tXhy	2	TRUE	333768	0.00285417	20.8922
rs214247	T	C	T	C	-0.0119	0.0154	0.6068	0.6048	FALSE	FALSE	FALSE	9UD0Uh	0.03316	0.0072	IBS	TRUE	reported	textfile	0.0026	6.455e-06	7301	M20675.metal.pos.txt.gz	1,5-anhydroglucitol (1,5-AG)	TRUE	reported	G5tXhy	2	TRUE	333768	0.00286102	20.9425
rs244763	A	G	A	G	0.012	-0.0166	0.3833	0.3767	FALSE	FALSE	FALSE	9UD0Uh	0.01924	0.0071	IBS	TRUE	reported	textfile	0.0027	8.704e-06	7301	M20675.metal.pos.txt.gz	1,5-anhydroglucitol (1,5-AG)	TRUE	reported	G5tXhy	2	TRUE	333768	0.00269823	19.7477
rs3793126	A	G	A	G	0.0123	-0.021	0.6974	0.7025	FALSE	FALSE	FALSE	9UD0Uh	0.006292	0.0077	IBS	TRUE	reported	textfile	0.0027	4.778e-06	7301	M20675.metal.pos.txt.gz	1,5-anhydroglucitol (1,5-AG)	TRUE	reported	G5tXhy	2	TRUE	333768	0.00283444	20.7474
rs3800993	T	C	T	C	0.0287	-0.005	0.1697	0.176	FALSE	FALSE	FALSE	9UD0Uh	0.6045	0.0097	IBS	TRUE	reported	textfile	0.0036	1.528e-15	7301	M20675.metal.pos.txt.gz	1,5-anhydroglucitol (1,5-AG)	TRUE	reported	G5tXhy	2	TRUE	333768	0.00863003	63.5389
rs4556997	A	C	A	C	-0.0189	-0.0114	0.1388	0.1335	FALSE	FALSE	FALSE	9UD0Uh	0.2562	0.0101	IBS	TRUE	reported	textfile	0.0042	6.399e-06	7301	M20675.metal.pos.txt.gz	1,5-anhydroglucitol (1,5-AG)	TRUE	reported	G5tXhy	2	TRUE	333768	0.00276592	20.2445
rs4671111	T	C	T	C	-0.0126	-0.0016	0.5592	0.5509	FALSE	FALSE	FALSE	9UD0Uh	0.8187	0.0071	IBS	TRUE	reported	textfile	0.0027	1.998e-06	7301	M20675.metal.pos.txt.gz	1,5-anhydroglucitol (1,5-AG)	TRUE	reported	G5tXhy	2	TRUE	333768	0.00297398	21.7718
rs4742351	T	C	T	C	-0.0125	-0.0028	0.393	0.391	FALSE	FALSE	FALSE	9UD0Uh	0.6915	0.0072	IBS	TRUE	reported	textfile	0.0027	2.812e-06	7301	M20675.metal.pos.txt.gz	1,5-anhydroglucitol (1,5-AG)	TRUE	reported	G5tXhy	2	TRUE	333768	0.0029271	21.4276
rs4791715	T	G	T	G	-0.0126	0.0079	0.594	0.5765	FALSE	FALSE	FALSE	9UD0Uh	0.255	0.0069	IBS	TRUE	reported	textfile	0.0026	1.658e-06	7301	M20675.metal.pos.txt.gz	1,5-anhydroglucitol (1,5-AG)	TRUE	reported	G5tXhy	2	TRUE	333768	0.0032064	23.4788
rs4954573	T	G	T	G	0.0219	-0.0052	0.7291	0.7574	FALSE	FALSE	FALSE	9UD0Uh	0.5195	0.0081	IBS	TRUE	reported	textfile	0.0033	2.529e-11	7301	M20675.metal.pos.txt.gz	1,5-anhydroglucitol (1,5-AG)	TRUE	reported	G5tXhy	2	TRUE	333768	0.00599606	44.0293
rs5027944	T	C	T	C	0.0122	0.0055	0.5795	0.586	FALSE	FALSE	FALSE	9UD0Uh	0.4285	0.0069	IBS	TRUE	reported	textfile	0.0027	3.931e-06	7301	M20675.metal.pos.txt.gz	1,5-anhydroglucitol (1,5-AG)	TRUE	reported	G5tXhy	2	TRUE	333768	0.00278867	20.4114
rs5757568	A	G	A	G	0.0122	0.0039	0.388	0.3735	FALSE	FALSE	FALSE	9UD0Uh	0.6111	0.0077	IBS	TRUE	reported	textfile	0.0027	5.104e-06	7301	M20675.metal.pos.txt.gz	1,5-anhydroglucitol (1,5-AG)	TRUE	reported	G5tXhy	2	TRUE	333768	0.00278867	20.4114
rs5998272	A	C	A	C	0.0261	-0.0086	0.9257	0.92	FALSE	FALSE	FALSE	9UD0Uh	0.4937	0.0126	IBS	TRUE	reported	textfile	0.0053	1.083e-06	7301	M20675.metal.pos.txt.gz	1,5-anhydroglucitol (1,5-AG)	TRUE	reported	G5tXhy	2	TRUE	333768	0.0033106	24.2443
rs618900	C	G	C	G	-0.016	0.001	0.8136	0.8118	FALSE	TRUE	FALSE	9UD0Uh	0.9056	0.0087	IBS	TRUE	reported	textfile	0.0035	5.997e-06	7301	M20675.metal.pos.txt.gz	1,5-anhydroglucitol (1,5-AG)	TRUE	reported	G5tXhy	2	TRUE	333768	0.00285417	20.8922
rs7570971	A	C	A	C	-0.0373	0.0078	0.3255	0.2742	FALSE	FALSE	FALSE	9UD0Uh	0.3714	0.0087	IBS	TRUE	reported	textfile	0.0027	7.861e-45	7301	M20675.metal.pos.txt.gz	1,5-anhydroglucitol (1,5-AG)	TRUE	reported	G5tXhy	2	TRUE	333768	0.0254742	190.797
rs7915784	A	G	A	G	0.0247	-0.0025	0.0662	0.07	FALSE	FALSE	FALSE	9UD0Uh	0.8525	0.0135	IBS	TRUE	reported	textfile	0.0053	2.647e-06	7301	M20675.metal.pos.txt.gz	1,5-anhydroglucitol (1,5-AG)	TRUE	reported	G5tXhy	2	TRUE	333768	0.00296599	21.7132
rs9556974	C	G	C	G	0.0135	0.0088	0.3426	0.3437	FALSE	TRUE	FALSE	9UD0Uh	0.2206	0.0072	IBS	TRUE	reported	textfile	0.0027	5.355e-07	7301	M20675.metal.pos.txt.gz	1,5-anhydroglucitol (1,5-AG)	TRUE	reported	G5tXhy	2	TRUE	333768	0.0034125	24.9932
rs9756306	A	G	A	G	-0.0158	-0.0087	0.3332	0.3247	FALSE	FALSE	FALSE	9UD0Uh	0.2302	0.0073	IBS	TRUE	reported	textfile	0.0027	3.64e-09	7301	M20675.metal.pos.txt.gz	1,5-anhydroglucitol (1,5-AG)	TRUE	reported	G5tXhy	2	TRUE	333768	0.00466844	34.2348
rs1000137	T	C	T	C	0.014	-0.0143	0.475	0.4771	FALSE	FALSE	FALSE	0z47oI	0.05294	0.0074	IBS	TRUE	reported	textfile	0.003	3.061e-06	5391	M21127.metal.pos.txt.gz	1-palmitoylglycerol (1-monopalmitin)	TRUE	reported	ukWbX1	2	TRUE	333768	0.0040234	21.7697
rs12145936	T	C	T	C	0.0287	0.0183	0.5511	0.5893	FALSE	FALSE	FALSE	0z47oI	0.01895	0.0078	IBS	TRUE	reported	textfile	0.0063	6.206e-06	1608	M21127.metal.pos.txt.gz	1-palmitoylglycerol (1-monopalmitin)	TRUE	reported	ukWbX1	2	TRUE	333768	0.0127417	20.7273
rs1260326	T	C	T	C	0.0134	0.0238	0.4039	0.3925	FALSE	FALSE	FALSE	0z47oI	0.0006301	0.007	IBS	TRUE	reported	textfile	0.0027	6.77e-07	6999	M21127.metal.pos.txt.gz	1-palmitoylglycerol (1-monopalmitin)	TRUE	reported	ukWbX1	2	TRUE	333768	0.00350688	24.624
rs12830350	T	G	T	G	0.0124	0.0092	0.3375	0.3324	FALSE	FALSE	FALSE	0z47oI	0.2025	0.0072	IBS	TRUE	reported	textfile	0.0027	5.878e-06	6999	M21127.metal.pos.txt.gz	1-palmitoylglycerol (1-monopalmitin)	TRUE	reported	ukWbX1	2	TRUE	333768	0.00300451	21.0859
rs1544542	A	C	A	C	0.0136	-0.0002	0.4642	0.4692	FALSE	FALSE	FALSE	0z47oI	0.9756	0.0069	IBS	TRUE	reported	textfile	0.0027	5.398e-07	6999	M21127.metal.pos.txt.gz	1-palmitoylglycerol (1-monopalmitin)	TRUE	reported	ukWbX1	2	TRUE	333768	0.00361196	25.3645
rs2378442	A	T	A	T	0.0127	0.0147	0.3445	0.3332	FALSE	TRUE	FALSE	0z47oI	0.04683	0.0074	IBS	TRUE	reported	textfile	0.0027	3.984e-06	6999	M21127.metal.pos.txt.gz	1-palmitoylglycerol (1-monopalmitin)	TRUE	reported	ukWbX1	2	TRUE	333768	0.00315118	22.1185
rs2584543	A	G	A	G	0.0246	0.0066	0.0698	0.0693	FALSE	FALSE	FALSE	0z47oI	0.6343	0.0138	IBS	TRUE	reported	textfile	0.0053	3.242e-06	6999	M21127.metal.pos.txt.gz	1-palmitoylglycerol (1-monopalmitin)	TRUE	reported	ukWbX1	2	TRUE	333768	0.00306865	21.5375
rs400511	T	C	T	C	0.0125	-0.0025	0.6391	0.6292	FALSE	FALSE	FALSE	0z47oI	0.7254	0.0071	IBS	TRUE	reported	textfile	0.0027	4.171e-06	6999	M21127.metal.pos.txt.gz	1-palmitoylglycerol (1-monopalmitin)	TRUE	reported	ukWbX1	2	TRUE	333768	0.00305301	21.4273
rs430508	A	G	A	G	-0.0122	-0.0013	0.4994	0.4972	FALSE	FALSE	FALSE	0z47oI	0.8459	0.0069	IBS	TRUE	reported	textfile	0.0027	7.022e-06	6999	M21127.metal.pos.txt.gz	1-palmitoylglycerol (1-monopalmitin)	TRUE	reported	ukWbX1	2	TRUE	333768	0.00290865	20.4112
rs4774615	A	G	A	G	-0.0184	-0.0019	0.8406	0.8306	FALSE	FALSE	FALSE	0z47oI	0.834	0.0091	IBS	TRUE	reported	textfile	0.0036	4.067e-07	6999	M21127.metal.pos.txt.gz	1-palmitoylglycerol (1-monopalmitin)	TRUE	reported	ukWbX1	2	TRUE	333768	0.00371858	26.116
rs4821424	A	G	A	G	-0.0125	-0.0109	0.5199	0.5158	FALSE	FALSE	FALSE	0z47oI	0.1105	0.0068	IBS	TRUE	reported	textfile	0.0027	3.972e-06	6999	M21127.metal.pos.txt.gz	1-palmitoylglycerol (1-monopalmitin)	TRUE	reported	ukWbX1	2	TRUE	333768	0.00305301	21.4273
rs6089908	T	C	T	C	-0.0122	-0.0067	0.5596	0.5665	FALSE	FALSE	FALSE	0z47oI	0.3759	0.0075	IBS	TRUE	reported	textfile	0.0027	7.185e-06	6999	M21127.metal.pos.txt.gz	1-palmitoylglycerol (1-monopalmitin)	TRUE	reported	ukWbX1	2	TRUE	333768	0.00290865	20.4112
rs757717	T	C	T	C	0.0203	0.0027	0.1121	0.1298	FALSE	FALSE	FALSE	0z47oI	0.7962	0.0103	IBS	TRUE	reported	textfile	0.0045	8.122e-06	6999	M21127.metal.pos.txt.gz	1-palmitoylglycerol (1-monopalmitin)	TRUE	reported	ukWbX1	2	TRUE	333768	0.00289915	20.3443
rs954050	T	C	T	C	0.0121	-0.0011	0.5912	0.5802	FALSE	FALSE	FALSE	0z47oI	0.8681	0.0069	IBS	TRUE	reported	textfile	0.0027	7.682e-06	6999	M21127.metal.pos.txt.gz	1-palmitoylglycerol (1-monopalmitin)	TRUE	reported	ukWbX1	2	TRUE	333768	0.0028613	20.0779
rs12615551	A	G	A	G	-0.0569	-0.0038	0.9347	0.9352	FALSE	FALSE	FALSE	amrRnX	0.7828	0.0139	IBS	TRUE	reported	textfile	0.0125	5.468e-06	1397	M22138.metal.pos.txt.gz	homocitrulline	TRUE	reported	H94LAB	2	TRUE	333768	0.0146155	20.691
rs2215015	T	C	T	C	-0.0195	0.0005	0.3426	0.3527	FALSE	FALSE	FALSE	amrRnX	0.9462	0.0072	IBS	TRUE	reported	textfile	0.004	1.245e-06	3950	M22138.metal.pos.txt.gz	homocitrulline	TRUE	reported	H94LAB	2	TRUE	333768	0.00598063	23.7536
rs2243617	A	G	A	G	-0.0284	-0.0107	0.8747	0.8626	FALSE	FALSE	FALSE	amrRnX	0.2836	0.01	IBS	TRUE	reported	textfile	0.0059	1.615e-06	3950	M22138.metal.pos.txt.gz	homocitrulline	TRUE	reported	H94LAB	2	TRUE	333768	0.0058317	23.1586
rs4452760	A	G	A	G	-0.0182	-0.0045	0.569	0.5733	FALSE	FALSE	FALSE	amrRnX	0.5148	0.0069	IBS	TRUE	reported	textfile	0.004	4.332e-06	3950	M22138.metal.pos.txt.gz	homocitrulline	TRUE	reported	H94LAB	2	TRUE	333768	0.00521381	20.692
rs6534307	T	G	T	G	-0.0248	0.0002	0.8647	0.8633	FALSE	FALSE	FALSE	amrRnX	0.9877	0.0099	IBS	TRUE	reported	textfile	0.0056	8.236e-06	3950	M22138.metal.pos.txt.gz	homocitrulline	TRUE	reported	H94LAB	2	TRUE	333768	0.00494059	19.6023
rs7989427	A	T	A	T	0.0492	0.0174	0.0528	0.0663	FALSE	TRUE	FALSE	amrRnX	0.2356	0.0146	IBS	TRUE	reported	textfile	0.011	7.843e-06	3950	M22138.metal.pos.txt.gz	homocitrulline	TRUE	reported	H94LAB	2	TRUE	333768	0.00503911	19.9952
rs8101881	T	C	T	C	0.0325	0.0124	0.613	0.6088	FALSE	FALSE	FALSE	amrRnX	0.07508	0.007	IBS	TRUE	reported	textfile	0.0039	1.434e-16	3950	M22138.metal.pos.txt.gz	homocitrulline	TRUE	reported	H94LAB	2	TRUE	333768	0.0172771	69.4093
rs12143106	T	C	T	C	0.0232	0.0077	0.5922	0.5941	FALSE	FALSE	FALSE	7oseQ7	0.2667	0.0069	IBS	TRUE	reported	textfile	0.0051	4.773e-06	3838	M22175.metal.pos.txt.gz	aspartylphenylalanine	TRUE	reported	BFqsPc	2	TRUE	333768	0.00536285	20.6828
rs13057057	T	C	T	C	-0.0943	-0.0122	0.0156	0.032	FALSE	FALSE	FALSE	7oseQ7	0.555	0.0206	IBS	TRUE	reported	textfile	0.0212	8.368e-06	3838	M22175.metal.pos.txt.gz	aspartylphenylalanine	TRUE	reported	BFqsPc	2	TRUE	333768	0.00512877	19.7754
rs16973789	A	G	A	G	-0.073	-0.0251	0.036	0.051	FALSE	FALSE	FALSE	7oseQ7	0.1367	0.0168	IBS	TRUE	reported	textfile	0.016	5.055e-06	2088	M22175.metal.pos.txt.gz	aspartylphenylalanine	TRUE	reported	BFqsPc	2	TRUE	333768	0.00987113	20.7965
rs2031504	T	G	T	G	0.0225	0.0071	0.4374	0.4287	FALSE	FALSE	FALSE	7oseQ7	0.3066	0.0069	IBS	TRUE	reported	textfile	0.005	8.138e-06	3838	M22175.metal.pos.txt.gz	aspartylphenylalanine	TRUE	reported	BFqsPc	2	TRUE	333768	0.00524849	20.2394
rs4351	A	G	A	G	-0.0455	-0.0037	0.4754	0.4811	FALSE	FALSE	FALSE	7oseQ7	0.5853	0.0068	IBS	TRUE	reported	textfile	0.005	1.24e-19	3838	M22175.metal.pos.txt.gz	aspartylphenylalanine	TRUE	reported	BFqsPc	2	TRUE	333768	0.0211206	82.7668
rs495828	T	G	T	G	-0.0312	-0.0095	0.217	0.2124	FALSE	FALSE	FALSE	7oseQ7	0.2529	0.0083	IBS	TRUE	reported	textfile	0.0059	1.433e-07	3838	M22175.metal.pos.txt.gz	aspartylphenylalanine	TRUE	reported	BFqsPc	2	TRUE	333768	0.00723348	27.9498
rs4968748	A	G	A	G	-0.0307	-0.0024	0.232	0.2245	FALSE	FALSE	FALSE	7oseQ7	0.7737	0.0082	IBS	TRUE	reported	textfile	0.0059	1.834e-07	3838	M22175.metal.pos.txt.gz	aspartylphenylalanine	TRUE	reported	BFqsPc	2	TRUE	333768	0.00700511	27.0612
rs10817879	T	C	T	C	0.0116	0.0051	0.5666	0.5563	FALSE	FALSE	FALSE	ZlRM35	0.485	0.0072	IBS	TRUE	reported	textfile	0.0024	1.455e-06	7256	M24074.metal.pos.txt.gz	X-09706	TRUE	reported	Uy6qQN	2	TRUE	333768	0.00320923	23.3547
rs11106514	A	G	A	G	-0.0331	0.0298	0.9495	0.9404	FALSE	FALSE	FALSE	ZlRM35	0.05618	0.0156	IBS	TRUE	reported	textfile	0.0071	3.517e-06	7256	M24074.metal.pos.txt.gz	X-09706	TRUE	reported	Uy6qQN	2	TRUE	333768	0.00298637	21.728
rs11236928	C	G	C	G	-0.0172	0.0041	0.1592	0.1587	FALSE	TRUE	FALSE	ZlRM35	0.6669	0.0094	IBS	TRUE	reported	textfile	0.0033	1.502e-07	7256	M24074.metal.pos.txt.gz	X-09706	TRUE	reported	Uy6qQN	2	TRUE	333768	0.00373	27.1587
rs12516773	A	G	A	G	0.0118	-0.0036	0.5206	0.5071	FALSE	FALSE	FALSE	ZlRM35	0.6017	0.0069	IBS	TRUE	reported	textfile	0.0024	1.255e-06	7256	M24074.metal.pos.txt.gz	X-09706	TRUE	reported	Uy6qQN	2	TRUE	333768	0.00332047	24.1669
rs12583752	A	C	A	C	-0.0255	0.0131	0.0954	0.1614	FALSE	FALSE	FALSE	ZlRM35	0.2135	0.0105	IBS	TRUE	reported	textfile	0.0055	3.646e-06	7256	M24074.metal.pos.txt.gz	X-09706	TRUE	reported	Uy6qQN	2	TRUE	333768	0.00295375	21.4899
rs1534979	T	C	T	C	-0.0112	0.0095	0.3253	0.3365	FALSE	FALSE	FALSE	ZlRM35	0.1882	0.0073	IBS	TRUE	reported	textfile	0.0025	8.138e-06	7256	M24074.metal.pos.txt.gz	X-09706	TRUE	reported	Uy6qQN	2	TRUE	333768	0.00275841	20.0649
rs17260469	T	C	T	C	0.0361	0.001	0.9112	0.8564	FALSE	FALSE	FALSE	ZlRM35	0.9257	0.0109	IBS	TRUE	reported	textfile	0.008	5.587e-06	7256	M24074.metal.pos.txt.gz	X-09706	TRUE	reported	Uy6qQN	2	TRUE	333768	0.00279847	20.357
rs17755177	A	T	A	T	-0.0115	0.0054	0.6786	0.6428	FALSE	TRUE	FALSE	ZlRM35	0.4463	0.0071	IBS	TRUE	reported	textfile	0.0025	3.437e-06	7256	M24074.metal.pos.txt.gz	X-09706	TRUE	reported	Uy6qQN	2	TRUE	333768	0.00290773	21.1542
rs17756479	C	G	C	G	0.0122	0.003	0.7131	0.7076	FALSE	TRUE	FALSE	ZlRM35	0.697	0.0076	IBS	TRUE	reported	textfile	0.0025	1.197e-06	7256	M24074.metal.pos.txt.gz	X-09706	TRUE	reported	Uy6qQN	2	TRUE	333768	0.00327129	23.8078
rs2007443	A	T	A	T	0.028	-0.0174	0.1321	0.1049	FALSE	TRUE	FALSE	ZlRM35	0.1191	0.0112	IBS	TRUE	reported	textfile	0.006	2.866e-06	1751	M24074.metal.pos.txt.gz	X-09706	TRUE	reported	Uy6qQN	2	TRUE	333768	0.0122846	21.7529
rs2034360	T	C	T	C	0.0174	-0.0075	0.8625	0.8405	FALSE	FALSE	FALSE	ZlRM35	0.4226	0.0094	IBS	TRUE	reported	textfile	0.0037	2.725e-06	7256	M24074.metal.pos.txt.gz	X-09706	TRUE	reported	Uy6qQN	2	TRUE	333768	0.00303862	22.1093
rs2049216	C	G	C	G	0.0201	-0.0001	0.1233	0.1666	FALSE	TRUE	FALSE	ZlRM35	0.9919	0.01	IBS	TRUE	reported	textfile	0.0044	5.427e-06	7256	M24074.metal.pos.txt.gz	X-09706	TRUE	reported	Uy6qQN	2	TRUE	333768	0.00286776	20.8625
rs4075958	A	G	A	G	0.0115	0.0034	0.262	0.2638	FALSE	FALSE	FALSE	ZlRM35	0.668	0.008	IBS	TRUE	reported	textfile	0.0025	5.275e-06	7256	M24074.metal.pos.txt.gz	X-09706	TRUE	reported	Uy6qQN	2	TRUE	333768	0.00290773	21.1542
rs4302786	A	T	A	T	-0.0501	0.0257	0.0131	0.0151	FALSE	TRUE	FALSE	ZlRM35	0.3894	0.0299	IBS	TRUE	reported	textfile	0.0112	7.43e-06	7256	M24074.metal.pos.txt.gz	X-09706	TRUE	reported	Uy6qQN	2	TRUE	333768	0.00275009	20.0041
rs4765356	A	G	A	G	0.0149	0.0023	0.8548	0.8575	FALSE	FALSE	FALSE	ZlRM35	0.8142	0.0099	IBS	TRUE	reported	textfile	0.0033	7.077e-06	7256	M24074.metal.pos.txt.gz	X-09706	TRUE	reported	Uy6qQN	2	TRUE	333768	0.00280175	20.381
rs4798481	A	G	A	G	-0.0153	-0.0079	0.1447	0.1348	FALSE	FALSE	FALSE	ZlRM35	0.4322	0.01	IBS	TRUE	reported	textfile	0.0033	2.957e-06	7256	M24074.metal.pos.txt.gz	X-09706	TRUE	reported	Uy6qQN	2	TRUE	333768	0.00295375	21.4899
rs4811661	T	C	T	C	-0.0113	-0.0131	0.3137	0.329	FALSE	FALSE	FALSE	ZlRM35	0.07027	0.0073	IBS	TRUE	reported	textfile	0.0025	6.594e-06	7256	M24074.metal.pos.txt.gz	X-09706	TRUE	reported	Uy6qQN	2	TRUE	333768	0.00280775	20.4248
rs5995601	A	G	A	G	0.0177	-0.0066	0.8544	0.8338	FALSE	FALSE	FALSE	ZlRM35	0.481	0.0094	IBS	TRUE	reported	textfile	0.0037	1.702e-06	7256	M24074.metal.pos.txt.gz	X-09706	TRUE	reported	Uy6qQN	2	TRUE	333768	0.00314397	22.8783
rs6832163	A	G	A	G	-0.016	0.0181	0.2711	0.2928	FALSE	FALSE	FALSE	ZlRM35	0.01943	0.0077	IBS	TRUE	reported	textfile	0.0034	3.48e-06	7256	M24074.metal.pos.txt.gz	X-09706	TRUE	reported	Uy6qQN	2	TRUE	333768	0.00304272	22.1392
rs7945891	A	G	A	G	0.0392	-0.0087	0.0587	0.0493	FALSE	FALSE	FALSE	ZlRM35	0.5815	0.0158	IBS	TRUE	reported	textfile	0.0088	8.086e-06	1751	M24074.metal.pos.txt.gz	X-09706	TRUE	reported	Uy6qQN	2	TRUE	333768	0.0112054	19.8203
rs7988423	T	C	T	C	0.0397	0.0048	0.952	0.9508	FALSE	FALSE	FALSE	ZlRM35	0.7681	0.0163	IBS	TRUE	reported	textfile	0.009	9.283e-06	1751	M24074.metal.pos.txt.gz	X-09706	TRUE	reported	Uy6qQN	2	TRUE	333768	0.0109903	19.4357
rs8137744	A	G	A	G	0.0123	0.0009	0.3814	0.4075	FALSE	FALSE	FALSE	ZlRM35	0.8999	0.0075	IBS	TRUE	reported	textfile	0.0027	5.55e-06	7256	M24074.metal.pos.txt.gz	X-09706	TRUE	reported	Uy6qQN	2	TRUE	333768	0.00285197	20.7474
rs10896833	T	C	T	C	0.087	-0.0184	0.9822	0.981	FALSE	FALSE	FALSE	0NXxlg	0.4821	0.0262	IBS	TRUE	reported	textfile	0.0186	3.036e-06	6715	M27710.metal.pos.txt.gz	N-acetylglycine	TRUE	reported	RlBCRs	2	TRUE	333768	0.00324754	21.8717
rs11030392	A	G	A	G	-0.0434	-0.0062	0.3845	0.3748	FALSE	FALSE	FALSE	0NXxlg	0.3795	0.007	IBS	TRUE	reported	textfile	0.0092	2.61e-06	1510	M27710.metal.pos.txt.gz	N-acetylglycine	TRUE	reported	RlBCRs	2	TRUE	333768	0.0145236	22.2243
rs12470532	T	C	T	C	0.0228	0.0069	0.6097	0.6033	FALSE	FALSE	FALSE	0NXxlg	0.3225	0.007	IBS	TRUE	reported	textfile	0.005	5.453e-06	6715	M27710.metal.pos.txt.gz	N-acetylglycine	TRUE	reported	RlBCRs	2	TRUE	333768	0.00308703	20.7874
rs12661239	A	G	A	G	0.0244	-0.0004	0.61	0.6024	FALSE	FALSE	FALSE	0NXxlg	0.9539	0.007	IBS	TRUE	reported	textfile	0.005	1.262e-06	6715	M27710.metal.pos.txt.gz	N-acetylglycine	TRUE	reported	RlBCRs	2	TRUE	333768	0.00353392	23.8073
rs1701843	A	G	A	G	-0.0194	-0.0093	0.6074	0.6046	FALSE	FALSE	FALSE	0NXxlg	0.1823	0.007	IBS	TRUE	reported	textfile	0.0044	8.903e-06	6715	M27710.metal.pos.txt.gz	N-acetylglycine	TRUE	reported	RlBCRs	2	TRUE	333768	0.00288667	19.4343
rs17709912	A	G	A	G	0.0472	-0.0055	0.7757	0.7861	FALSE	FALSE	FALSE	0NXxlg	0.5092	0.0083	IBS	TRUE	reported	textfile	0.0105	6.414e-06	1510	M27710.metal.pos.txt.gz	N-acetylglycine	TRUE	reported	RlBCRs	2	TRUE	333768	0.0132055	20.1804
rs2997201	A	G	A	G	-0.0195	-0.0033	0.614	0.5998	FALSE	FALSE	FALSE	0NXxlg	0.6305	0.007	IBS	TRUE	reported	textfile	0.0044	7.415e-06	6715	M27710.metal.pos.txt.gz	N-acetylglycine	TRUE	reported	RlBCRs	2	TRUE	333768	0.00291642	19.6352
rs472847	T	C	T	C	0.0243	0.0115	0.3494	0.4008	FALSE	FALSE	FALSE	0NXxlg	0.0993	0.007	IBS	TRUE	reported	textfile	0.0054	7.138e-06	6715	M27710.metal.pos.txt.gz	N-acetylglycine	TRUE	reported	RlBCRs	2	TRUE	333768	0.00300657	20.244
rs4774192	T	C	T	C	0.0709	0.0041	0.1306	0.133	FALSE	FALSE	FALSE	0NXxlg	0.6795	0.01	IBS	TRUE	reported	textfile	0.0137	2.061e-07	1510	M27710.metal.pos.txt.gz	N-acetylglycine	TRUE	reported	RlBCRs	2	TRUE	333768	0.0174277	26.747
rs715	T	C	T	C	-0.091	-0.013	0.7096	0.6887	FALSE	FALSE	FALSE	0NXxlg	0.0854	0.0075	IBS	TRUE	reported	textfile	0.0057	6.658e-58	6715	M27710.metal.pos.txt.gz	N-acetylglycine	TRUE	reported	RlBCRs	2	TRUE	333768	0.0365686	254.803
rs780245	T	C	T	C	0.0289	0.0122	0.1757	0.1705	FALSE	FALSE	FALSE	0NXxlg	0.1863	0.0092	IBS	TRUE	reported	textfile	0.0059	1.154e-06	6715	M27710.metal.pos.txt.gz	N-acetylglycine	TRUE	reported	RlBCRs	2	TRUE	333768	0.00356038	23.9862
rs7948073	T	G	T	G	-0.0256	-0.0063	0.5702	0.566	FALSE	FALSE	FALSE	0NXxlg	0.3587	0.0069	IBS	TRUE	reported	textfile	0.0044	4.604e-09	6715	M27710.metal.pos.txt.gz	N-acetylglycine	TRUE	reported	RlBCRs	2	TRUE	333768	0.00501585	33.8412
rs797072	A	G	A	G	0.0217	0.0051	0.5347	0.5398	FALSE	FALSE	FALSE	0NXxlg	0.4712	0.0071	IBS	TRUE	reported	textfile	0.0044	6.283e-07	6715	M27710.metal.pos.txt.gz	N-acetylglycine	TRUE	reported	RlBCRs	2	TRUE	333768	0.00360909	24.3156
rs8057910	T	C	T	C	-0.0391	0.011	0.0712	0.0755	FALSE	FALSE	FALSE	0NXxlg	0.394	0.0129	IBS	TRUE	reported	textfile	0.0088	8.521e-06	6715	M27710.metal.pos.txt.gz	N-acetylglycine	TRUE	reported	RlBCRs	2	TRUE	333768	0.00293135	19.736
rs805936	A	G	A	G	-0.0897	0.0004	0.9841	0.9814	FALSE	FALSE	FALSE	0NXxlg	0.9884	0.0254	IBS	TRUE	reported	textfile	0.0184	1.159e-06	6715	M27710.metal.pos.txt.gz	N-acetylglycine	TRUE	reported	RlBCRs	2	TRUE	333768	0.0035267	23.7585
rs840381	T	C	T	C	0.0194	-0.0051	0.6429	0.6467	FALSE	FALSE	FALSE	0NXxlg	0.4768	0.0071	IBS	TRUE	reported	textfile	0.0044	9.755e-06	6715	M27710.metal.pos.txt.gz	N-acetylglycine	TRUE	reported	RlBCRs	2	TRUE	333768	0.00288667	19.4343
rs10906914	A	C	A	C	0.0172	-0.0117	0.7034	0.6843	FALSE	FALSE	FALSE	BRKTzB	0.1108	0.0073	IBS	TRUE	reported	textfile	0.0038	4.806e-06	7356	M32319.metal.pos.txt.gz	trans-4-hydroxyproline	TRUE	reported	h21aeB	2	TRUE	333768	0.00277741	20.482
rs1357743	T	G	T	G	0.0322	-0.004	0.5585	0.5645	FALSE	FALSE	FALSE	BRKTzB	0.559	0.0069	IBS	TRUE	reported	textfile	0.0069	2.789e-06	1765	M32319.metal.pos.txt.gz	trans-4-hydroxyproline	TRUE	reported	h21aeB	2	TRUE	333768	0.0121883	21.7531
rs6926138	T	C	T	C	-0.0337	0.0086	0.6583	0.6242	FALSE	FALSE	FALSE	BRKTzB	0.2258	0.0071	IBS	TRUE	reported	textfile	0.0075	6.262e-06	1765	M32319.metal.pos.txt.gz	trans-4-hydroxyproline	TRUE	reported	h21aeB	2	TRUE	333768	0.0113097	20.1672
rs7342491	T	C	T	C	-0.1192	0.0037	0.0167	0.0136	FALSE	FALSE	FALSE	BRKTzB	0.9121	0.0333	IBS	TRUE	reported	textfile	0.0264	6.486e-06	1765	M32319.metal.pos.txt.gz	trans-4-hydroxyproline	TRUE	reported	h21aeB	2	TRUE	333768	0.0114186	20.3635
rs7429997	T	C	T	C	-0.0161	-0.001	0.3794	0.3739	FALSE	FALSE	FALSE	BRKTzB	0.893	0.0074	IBS	TRUE	reported	textfile	0.0037	9.944e-06	7356	M32319.metal.pos.txt.gz	trans-4-hydroxyproline	TRUE	reported	h21aeB	2	TRUE	333768	0.00256738	18.9291
rs9863850	A	G	A	G	-0.0177	0.0147	0.6414	0.6473	FALSE	FALSE	FALSE	BRKTzB	0.05818	0.0077	IBS	TRUE	reported	textfile	0.004	8.548e-06	7356	M32319.metal.pos.txt.gz	trans-4-hydroxyproline	TRUE	reported	h21aeB	2	TRUE	333768	0.00265479	19.5753
rs10963621	A	T	A	T	-0.0324	-0.021	0.8663	0.8293	FALSE	TRUE	FALSE	ShzQxE	0.02417	0.0093	IBS	TRUE	reported	textfile	0.0073	9.779e-06	7361	M32553.metal.pos.txt.gz	phenol sulfate	TRUE	reported	DQa9Hj	2	TRUE	333768	0.00266899	19.6937
rs11133365	T	C	T	C	-0.0715	0.0224	0.9007	0.9082	FALSE	FALSE	FALSE	ShzQxE	0.06007	0.0119	IBS	TRUE	reported	textfile	0.016	7.617e-06	1766	M32553.metal.pos.txt.gz	phenol sulfate	TRUE	reported	DQa9Hj	2	TRUE	333768	0.0111814	19.9471
rs11779285	A	T	A	T	0.0231	-0.0173	0.3845	0.355	FALSE	TRUE	FALSE	ShzQxE	0.01573	0.0072	IBS	TRUE	reported	textfile	0.0051	6.499e-06	7361	M32553.metal.pos.txt.gz	phenol sulfate	TRUE	reported	DQa9Hj	2	TRUE	333768	0.00277932	20.51
rs13195040	A	G	A	G	-0.0373	0.0287	0.9137	0.8924	FALSE	FALSE	FALSE	ShzQxE	0.009381	0.0111	IBS	TRUE	reported	textfile	0.008	3.592e-06	7361	M32553.metal.pos.txt.gz	phenol sulfate	TRUE	reported	DQa9Hj	2	TRUE	333768	0.00294456	21.733
rs13198474	A	G	A	G	0.042	-0.0236	0.0945	0.0918	FALSE	FALSE	FALSE	ShzQxE	0.04771	0.0119	IBS	TRUE	reported	textfile	0.0081	2.236e-07	7361	M32553.metal.pos.txt.gz	phenol sulfate	TRUE	reported	DQa9Hj	2	TRUE	333768	0.00363922	26.8788
rs13211507	T	C	T	C	-0.0327	0.0265	0.8862	0.8881	FALSE	FALSE	FALSE	ShzQxE	0.01502	0.0109	IBS	TRUE	reported	textfile	0.0073	6.866e-06	7361	M32553.metal.pos.txt.gz	phenol sulfate	TRUE	reported	DQa9Hj	2	TRUE	333768	0.00271851	20.06
rs1452040	A	C	A	C	-0.0539	0.0088	0.7973	0.7733	FALSE	FALSE	FALSE	ShzQxE	0.3024	0.0085	IBS	TRUE	reported	textfile	0.0116	3.682e-06	1766	M32553.metal.pos.txt.gz	phenol sulfate	TRUE	reported	DQa9Hj	2	TRUE	333768	0.012078	21.566
rs16901784	A	C	A	C	0.0365	-0.0344	0.1157	0.1337	FALSE	FALSE	FALSE	ShzQxE	0.0006151	0.01	IBS	TRUE	reported	textfile	0.0071	2.64e-07	7361	M32553.metal.pos.txt.gz	phenol sulfate	TRUE	reported	DQa9Hj	2	TRUE	333768	0.00357747	26.4211
rs17628016	A	G	A	G	0.0316	-0.0024	0.1561	0.1671	FALSE	FALSE	FALSE	ShzQxE	0.7971	0.0092	IBS	TRUE	reported	textfile	0.0069	4.118e-06	7361	M32553.metal.pos.txt.gz	phenol sulfate	TRUE	reported	DQa9Hj	2	TRUE	333768	0.00284121	20.968
rs17642590	C	G	C	G	-0.0337	0.008	0.8943	0.9105	FALSE	TRUE	FALSE	ShzQxE	0.5093	0.0121	IBS	TRUE	reported	textfile	0.0072	2.665e-06	7361	M32553.metal.pos.txt.gz	phenol sulfate	TRUE	reported	DQa9Hj	2	TRUE	333768	0.00296734	21.9016
rs3010305	T	C	T	C	0.0327	-0.0083	0.1318	0.1368	FALSE	FALSE	FALSE	ShzQxE	0.4251	0.0105	IBS	TRUE	reported	textfile	0.0071	4.436e-06	7361	M32553.metal.pos.txt.gz	phenol sulfate	TRUE	reported	DQa9Hj	2	TRUE	333768	0.00287337	21.2061
rs4324798	A	G	A	G	0.0354	-0.0274	0.1136	0.1144	FALSE	FALSE	FALSE	ShzQxE	0.01332	0.0111	IBS	TRUE	reported	textfile	0.0073	1.083e-06	7361	M32553.metal.pos.txt.gz	phenol sulfate	TRUE	reported	DQa9Hj	2	TRUE	333768	0.00318448	23.5095
rs6916131	T	G	T	G	-0.0631	0.0137	0.9697	0.9662	FALSE	FALSE	FALSE	ShzQxE	0.5003	0.0203	IBS	TRUE	reported	textfile	0.0137	4.447e-06	7361	M32553.metal.pos.txt.gz	phenol sulfate	TRUE	reported	DQa9Hj	2	TRUE	333768	0.00287363	21.208
rs7118058	T	G	T	G	0.0474	-0.0232	0.0603	0.0768	FALSE	FALSE	FALSE	ShzQxE	0.09574	0.014	IBS	TRUE	reported	textfile	0.0106	8.133e-06	7361	M32553.metal.pos.txt.gz	phenol sulfate	TRUE	reported	DQa9Hj	2	TRUE	333768	0.00270913	19.9907
rs7714057	T	C	T	C	0.0456	-0.0089	0.0685	0.0802	FALSE	FALSE	FALSE	ShzQxE	0.4835	0.0127	IBS	TRUE	reported	textfile	0.0095	1.747e-06	7361	M32553.metal.pos.txt.gz	phenol sulfate	TRUE	reported	DQa9Hj	2	TRUE	333768	0.00312024	23.0337
rs9682960	T	C	T	C	-0.0388	-0.0027	0.8843	0.879	FALSE	FALSE	FALSE	ShzQxE	0.8127	0.0114	IBS	TRUE	reported	textfile	0.0083	3.362e-06	7361	M32553.metal.pos.txt.gz	phenol sulfate	TRUE	reported	DQa9Hj	2	TRUE	333768	0.00295994	21.8469
rs10517818	T	C	T	C	-0.0501	0.0018	0.8138	0.8084	FALSE	FALSE	FALSE	raiBAv	0.8395	0.0089	IBS	TRUE	reported	textfile	0.0111	6.62e-06	6379	M32754.metal.pos.txt.gz	X-11437	TRUE	reported	S28ZhO	2	TRUE	333768	0.00318341	20.3654
rs12435324	C	G	C	G	-0.4219	0.0391	0.0126	0.0117	FALSE	TRUE	FALSE	raiBAv	0.269	0.0354	IBS	TRUE	reported	textfile	0.0908	3.371e-06	1368	M32754.metal.pos.txt.gz	X-11437	TRUE	reported	S28ZhO	2	TRUE	333768	0.0155368	21.5582
rs13073145	C	G	C	G	-0.097	0.024	0.0616	0.0745	FALSE	TRUE	FALSE	raiBAv	0.0682	0.0132	IBS	TRUE	reported	textfile	0.0219	9.479e-06	6379	M32754.metal.pos.txt.gz	X-11437	TRUE	reported	S28ZhO	2	TRUE	333768	0.00306598	19.6119
rs1405215	A	G	A	G	0.0623	-0.0164	0.165	0.1765	FALSE	FALSE	FALSE	raiBAv	0.06662	0.009	IBS	TRUE	reported	textfile	0.0116	8.003e-08	6379	M32754.metal.pos.txt.gz	X-11437	TRUE	reported	S28ZhO	2	TRUE	333768	0.00450141	28.8353
rs16926956	T	G	T	G	-0.052	0.0032	0.1948	0.2025	FALSE	FALSE	FALSE	raiBAv	0.7067	0.0085	IBS	TRUE	reported	textfile	0.0109	1.77e-06	6379	M32754.metal.pos.txt.gz	X-11437	TRUE	reported	S28ZhO	2	TRUE	333768	0.00355512	22.7519
rs17040357	A	G	A	G	0.3091	-0.0222	0.9825	0.9839	FALSE	FALSE	FALSE	raiBAv	0.4549	0.0297	IBS	TRUE	reported	textfile	0.0679	5.378e-06	1368	M32754.metal.pos.txt.gz	X-11437	TRUE	reported	S28ZhO	2	TRUE	333768	0.0149225	20.693
rs17825729	C	G	C	G	-0.0711	0.0092	0.0842	0.0899	FALSE	TRUE	FALSE	raiBAv	0.4409	0.012	IBS	TRUE	reported	textfile	0.0153	3.356e-06	6379	M32754.metal.pos.txt.gz	X-11437	TRUE	reported	S28ZhO	2	TRUE	333768	0.00337393	21.5884
rs2460621	T	C	T	C	0.0795	-0.001	0.9207	0.8804	FALSE	FALSE	FALSE	raiBAv	0.9294	0.0111	IBS	TRUE	reported	textfile	0.018	9.836e-06	6379	M32754.metal.pos.txt.gz	X-11437	TRUE	reported	S28ZhO	2	TRUE	333768	0.00304867	19.5008
rs335810	A	C	A	C	0.3722	-0.0444	0.9883	0.9881	FALSE	FALSE	FALSE	raiBAv	0.2095	0.0354	IBS	TRUE	reported	textfile	0.0827	6.802e-06	1368	M32754.metal.pos.txt.gz	X-11437	TRUE	reported	S28ZhO	2	TRUE	333768	0.0145906	20.2258
rs4919957	A	G	A	G	0.1629	0.0014	0.0653	0.0552	FALSE	FALSE	FALSE	raiBAv	0.9347	0.0165	IBS	TRUE	reported	textfile	0.0358	5.397e-06	1368	M32754.metal.pos.txt.gz	X-11437	TRUE	reported	S28ZhO	2	TRUE	333768	0.0149096	20.6748
rs555851	A	G	A	G	-0.0363	0.0007	0.549	0.5441	FALSE	FALSE	FALSE	raiBAv	0.9168	0.0068	IBS	TRUE	reported	textfile	0.0082	9.227e-06	6379	M32754.metal.pos.txt.gz	X-11437	TRUE	reported	S28ZhO	2	TRUE	333768	0.00306267	19.5907
rs6415698	A	C	A	C	0.0548	0.0031	0.7774	0.7781	FALSE	FALSE	FALSE	raiBAv	0.7119	0.0083	IBS	TRUE	reported	textfile	0.0107	3.1e-07	6379	M32754.metal.pos.txt.gz	X-11437	TRUE	reported	S28ZhO	2	TRUE	333768	0.00409505	26.2215
rs7321884	T	C	T	C	0.1488	-0.0105	0.0207	0.0185	FALSE	FALSE	FALSE	raiBAv	0.6851	0.0259	IBS	TRUE	reported	textfile	0.0316	2.431e-06	6379	M32754.metal.pos.txt.gz	X-11437	TRUE	reported	S28ZhO	2	TRUE	333768	0.00346395	22.1664
rs768328	T	C	T	C	-0.0464	-0.0007	0.228	0.2231	FALSE	FALSE	FALSE	raiBAv	0.9365	0.0082	IBS	TRUE	reported	textfile	0.0099	3.086e-06	6379	M32754.metal.pos.txt.gz	X-11437	TRUE	reported	S28ZhO	2	TRUE	333768	0.00343178	21.9599
rs9543952	A	G	A	G	-0.053	-0.0099	0.8491	0.8425	FALSE	FALSE	FALSE	raiBAv	0.2885	0.0094	IBS	TRUE	reported	textfile	0.0117	5.798e-06	6379	M32754.metal.pos.txt.gz	X-11437	TRUE	reported	S28ZhO	2	TRUE	333768	0.00320651	20.5137
rs10004910	A	G	A	G	0.0179	-0.006	0.5631	0.561	FALSE	FALSE	FALSE	C3BXJ2	0.4054	0.0072	IBS	TRUE	reported	textfile	0.0034	1.618e-07	6658	M32755.metal.pos.txt.gz	X-11438	TRUE	reported	seIJCm	2	TRUE	333768	0.00414572	27.7088
rs11905915	A	G	A	G	-0.0166	0.0072	0.5878	0.585	FALSE	FALSE	FALSE	C3BXJ2	0.3052	0.0071	IBS	TRUE	reported	textfile	0.0035	1.917e-06	6658	M32755.metal.pos.txt.gz	X-11438	TRUE	reported	seIJCm	2	TRUE	333768	0.00336722	22.4879
rs1365505	T	C	T	C	0.0198	0.0021	0.681	0.6807	FALSE	FALSE	FALSE	C3BXJ2	0.7722	0.0073	IBS	TRUE	reported	textfile	0.004	1.057e-06	6658	M32755.metal.pos.txt.gz	X-11438	TRUE	reported	seIJCm	2	TRUE	333768	0.00366667	24.4951
rs1483739	A	C	A	C	0.0213	0.0085	0.2365	0.2397	FALSE	FALSE	FALSE	C3BXJ2	0.2984	0.0082	IBS	TRUE	reported	textfile	0.0042	5.076e-07	6658	M32755.metal.pos.txt.gz	X-11438	TRUE	reported	seIJCm	2	TRUE	333768	0.00384807	25.7117
rs17130142	A	G	A	G	0.116	-0.0186	0.0254	0.0393	FALSE	FALSE	FALSE	C3BXJ2	0.3302	0.0191	IBS	TRUE	reported	textfile	0.0261	8.695e-06	1435	M32755.metal.pos.txt.gz	X-11438	TRUE	reported	seIJCm	2	TRUE	333768	0.0135783	19.7256
rs174605	T	G	T	G	0.0195	-0.0095	0.284	0.2945	FALSE	FALSE	FALSE	C3BXJ2	0.2056	0.0075	IBS	TRUE	reported	textfile	0.0042	3.07e-06	6658	M32755.metal.pos.txt.gz	X-11438	TRUE	reported	seIJCm	2	TRUE	333768	0.00322718	21.5496
rs17525557	T	C	T	C	-0.0417	-0.0101	0.956	0.9505	FALSE	FALSE	FALSE	C3BXJ2	0.528	0.0161	IBS	TRUE	reported	textfile	0.0092	6.068e-06	6658	M32755.metal.pos.txt.gz	X-11438	TRUE	reported	seIJCm	2	TRUE	333768	0.0030762	20.5384
rs1860538	T	G	T	G	0.0163	-0.0041	0.5561	0.5444	FALSE	FALSE	FALSE	C3BXJ2	0.5531	0.0069	IBS	TRUE	reported	textfile	0.0034	1.668e-06	6658	M32755.metal.pos.txt.gz	X-11438	TRUE	reported	seIJCm	2	TRUE	333768	0.00344015	22.9767
rs2032205	T	C	T	C	-0.0706	-0.0313	0.0171	0.02	FALSE	FALSE	FALSE	C3BXJ2	0.2091	0.0249	IBS	TRUE	reported	textfile	0.0152	3.185e-06	6658	M32755.metal.pos.txt.gz	X-11438	TRUE	reported	seIJCm	2	TRUE	333768	0.00322978	21.5671
rs2395859	A	G	A	G	0.0199	-0.0226	0.8015	0.7743	FALSE	FALSE	FALSE	C3BXJ2	0.005622	0.0082	IBS	TRUE	reported	textfile	0.0043	3.877e-06	6658	M32755.metal.pos.txt.gz	X-11438	TRUE	reported	seIJCm	2	TRUE	333768	0.0032065	21.4111
rs2934442	T	C	T	C	0.0191	-0.0133	0.7993	0.7907	FALSE	FALSE	FALSE	C3BXJ2	0.1143	0.0084	IBS	TRUE	reported	textfile	0.0043	6.845e-06	6658	M32755.metal.pos.txt.gz	X-11438	TRUE	reported	seIJCm	2	TRUE	333768	0.00295462	19.7242
rs3112734	T	C	T	C	-0.0604	0.0264	0.0221	0.0254	FALSE	FALSE	FALSE	C3BXJ2	0.2608	0.0235	IBS	TRUE	reported	textfile	0.0135	7.79e-06	6658	M32755.metal.pos.txt.gz	X-11438	TRUE	reported	seIJCm	2	TRUE	333768	0.0029975	20.0113
rs4866873	T	C	T	C	0.0521	-0.0155	0.8725	0.8616	FALSE	FALSE	FALSE	C3BXJ2	0.1242	0.0101	IBS	TRUE	reported	textfile	0.01	1.71e-07	1435	M32755.metal.pos.txt.gz	X-11438	TRUE	reported	seIJCm	2	TRUE	333768	0.0185646	27.1063
rs4963728	T	C	T	C	-0.0257	-0.0074	0.1436	0.1402	FALSE	FALSE	FALSE	C3BXJ2	0.4603	0.01	IBS	TRUE	reported	textfile	0.005	2.591e-07	6658	M32755.metal.pos.txt.gz	X-11438	TRUE	reported	seIJCm	2	TRUE	333768	0.00395241	26.4117
rs4977264	T	C	T	C	-0.0162	-0.0062	0.5535	0.5485	FALSE	FALSE	FALSE	C3BXJ2	0.3649	0.0069	IBS	TRUE	reported	textfile	0.0034	2.47e-06	6658	M32755.metal.pos.txt.gz	X-11438	TRUE	reported	seIJCm	2	TRUE	333768	0.00339821	22.6956
rs6077678	A	G	A	G	-0.0246	0.0022	0.8477	0.8331	FALSE	FALSE	FALSE	C3BXJ2	0.812	0.0092	IBS	TRUE	reported	textfile	0.005	8.746e-07	6658	M32755.metal.pos.txt.gz	X-11438	TRUE	reported	seIJCm	2	TRUE	333768	0.00362252	24.1991
rs7228173	T	C	T	C	0.0187	-0.0022	0.2694	0.2937	FALSE	FALSE	FALSE	C3BXJ2	0.7679	0.0075	IBS	TRUE	reported	textfile	0.0041	6.114e-06	6658	M32755.metal.pos.txt.gz	X-11438	TRUE	reported	seIJCm	2	TRUE	333768	0.0031147	20.7962
rs7337711	T	C	T	C	0.0408	-0.0187	0.1564	0.1458	FALSE	FALSE	FALSE	C3BXJ2	0.05402	0.0097	IBS	TRUE	reported	textfile	0.009	5.443e-06	1435	M32755.metal.pos.txt.gz	X-11438	TRUE	reported	seIJCm	2	TRUE	333768	0.0141191	20.5225
rs760955	T	C	T	C	0.0238	0.0103	0.281	0.3459	FALSE	FALSE	FALSE	C3BXJ2	0.1844	0.0078	IBS	TRUE	reported	textfile	0.0049	1.089e-06	6658	M32755.metal.pos.txt.gz	X-11438	TRUE	reported	seIJCm	2	TRUE	333768	0.00353087	23.5847
rs7702466	A	G	A	G	0.0316	0.0058	0.1021	0.1236	FALSE	FALSE	FALSE	C3BXJ2	0.5805	0.0104	IBS	TRUE	reported	textfile	0.0068	3.011e-06	6658	M32755.metal.pos.txt.gz	X-11438	TRUE	reported	seIJCm	2	TRUE	333768	0.003233	21.5887
rs780094	T	C	T	C	-0.0164	0.0225	0.3929	0.3809	FALSE	FALSE	FALSE	C3BXJ2	0.001337	0.007	IBS	TRUE	reported	textfile	0.0034	1.613e-06	6658	M32755.metal.pos.txt.gz	X-11438	TRUE	reported	seIJCm	2	TRUE	333768	0.00348234	23.2594
rs9296110	T	C	T	C	0.0427	0	0.9639	0.9528	FALSE	FALSE	FALSE	C3BXJ2	0.9987	0.0164	IBS	TRUE	reported	textfile	0.0096	8.955e-06	6658	M32755.metal.pos.txt.gz	X-11438	TRUE	reported	seIJCm	2	TRUE	333768	0.00296265	19.778
rs944846	T	C	T	C	0.0575	-0.0055	0.0802	0.0822	FALSE	FALSE	FALSE	C3BXJ2	0.6696	0.0128	IBS	TRUE	reported	textfile	0.0118	1.185e-06	1435	M32755.metal.pos.txt.gz	X-11438	TRUE	reported	seIJCm	2	TRUE	333768	0.0162777	23.7119
rs9513800	A	G	A	G	-0.041	0.0164	0.0449	0.0421	FALSE	FALSE	FALSE	C3BXJ2	0.3575	0.0178	IBS	TRUE	reported	textfile	0.0089	3.845e-06	6658	M32755.metal.pos.txt.gz	X-11438	TRUE	reported	seIJCm	2	TRUE	333768	0.00317733	21.2157
rs10023223	T	C	T	C	-0.0256	0.0045	0.8808	0.881	FALSE	FALSE	FALSE	UjXgeI	0.6676	0.0105	IBS	TRUE	reported	textfile	0.0056	5.583e-06	6753	M32838.metal.pos.txt.gz	X-11521	TRUE	reported	J7Z6XP	2	TRUE	333768	0.00308507	20.8918
rs10994294	T	C	T	C	0.0738	-0.0134	0.0651	0.0629	FALSE	FALSE	FALSE	UjXgeI	0.3824	0.0153	IBS	TRUE	reported	textfile	0.0163	5.797e-06	1307	M32838.metal.pos.txt.gz	X-11521	TRUE	reported	J7Z6XP	2	TRUE	333768	0.015442	20.4679
rs11134995	T	C	T	C	0.0177	-0.0091	0.3569	0.364	FALSE	FALSE	FALSE	UjXgeI	0.2201	0.0074	IBS	TRUE	reported	textfile	0.0038	2.959e-06	6753	M32838.metal.pos.txt.gz	X-11521	TRUE	reported	J7Z6XP	2	TRUE	333768	0.0032025	21.6896
rs1171660	A	G	A	G	-0.0189	-0.0072	0.6827	0.6715	FALSE	FALSE	FALSE	UjXgeI	0.3213	0.0073	IBS	TRUE	reported	textfile	0.0038	6.892e-07	6753	M32838.metal.pos.txt.gz	X-11521	TRUE	reported	J7Z6XP	2	TRUE	333768	0.00364982	24.7302
rs13037679	A	G	A	G	-0.0217	0.0064	0.7782	0.7687	FALSE	FALSE	FALSE	UjXgeI	0.4542	0.0085	IBS	TRUE	reported	textfile	0.0047	5.009e-06	6753	M32838.metal.pos.txt.gz	X-11521	TRUE	reported	J7Z6XP	2	TRUE	333768	0.00314672	21.3106
rs16833668	A	C	A	C	0.0211	-0.0133	0.3149	0.3064	FALSE	FALSE	FALSE	UjXgeI	0.07311	0.0074	IBS	TRUE	reported	textfile	0.0038	2.914e-08	6753	M32838.metal.pos.txt.gz	X-11521	TRUE	reported	J7Z6XP	2	TRUE	333768	0.00454488	30.8226
rs2234185	T	C	T	C	-0.0169	0.0039	0.5191	0.512	FALSE	FALSE	FALSE	UjXgeI	0.5689	0.0069	IBS	TRUE	reported	textfile	0.0038	9.33e-06	6753	M32838.metal.pos.txt.gz	X-11521	TRUE	reported	J7Z6XP	2	TRUE	333768	0.00292038	19.7732
rs3741298	T	C	T	C	-0.044	-0.0003	0.7854	0.8055	FALSE	FALSE	FALSE	UjXgeI	0.9722	0.0086	IBS	TRUE	reported	textfile	0.0097	6.097e-06	1307	M32838.metal.pos.txt.gz	X-11521	TRUE	reported	J7Z6XP	2	TRUE	333768	0.015499	20.5446
rs4733166	T	C	T	C	-0.0198	0.0097	0.6812	0.6821	FALSE	FALSE	FALSE	UjXgeI	0.1824	0.0073	IBS	TRUE	reported	textfile	0.0039	2.842e-07	6753	M32838.metal.pos.txt.gz	X-11521	TRUE	reported	J7Z6XP	2	TRUE	333768	0.00380233	25.7675
rs662138	C	G	C	G	0.0292	-0.0001	0.8314	0.8161	FALSE	TRUE	FALSE	UjXgeI	0.9932	0.0088	IBS	TRUE	reported	textfile	0.0055	1.398e-07	6753	M32838.metal.pos.txt.gz	X-11521	TRUE	reported	J7Z6XP	2	TRUE	333768	0.00415657	28.1781
rs9318132	A	C	A	C	-0.021	0.0104	0.2664	0.2765	FALSE	FALSE	FALSE	UjXgeI	0.1739	0.0076	IBS	TRUE	reported	textfile	0.0046	5.266e-06	6753	M32838.metal.pos.txt.gz	X-11521	TRUE	reported	J7Z6XP	2	TRUE	333768	0.00307672	20.835
rs981831	T	C	T	C	0.0267	-0.0067	0.123	0.1206	FALSE	FALSE	FALSE	UjXgeI	0.5242	0.0106	IBS	TRUE	reported	textfile	0.0057	2.482e-06	6753	M32838.metal.pos.txt.gz	X-11521	TRUE	reported	J7Z6XP	2	TRUE	333768	0.00323867	21.9353
rs10428305	T	C	T	C	0.0324	0.0002	0.6101	0.6176	FALSE	FALSE	FALSE	0twTqn	0.9821	0.0071	IBS	TRUE	reported	textfile	0.0064	4.639e-07	2684	M32854.metal.pos.txt.gz	X-11537	TRUE	reported	QgsV1h	2	TRUE	333768	0.00945846	25.6098
rs174548	C	G	C	G	-0.0341	0.016	0.7165	0.6859	FALSE	TRUE	FALSE	0twTqn	0.03065	0.0074	IBS	TRUE	reported	textfile	0.007	1.191e-06	2684	M32854.metal.pos.txt.gz	X-11537	TRUE	reported	QgsV1h	2	TRUE	333768	0.0087641	23.7131
rs4899909	A	G	A	G	0.0482	-0.0329	0.8983	0.8968	FALSE	FALSE	FALSE	0twTqn	0.003359	0.0112	IBS	TRUE	reported	textfile	0.0108	7.93e-06	2684	M32854.metal.pos.txt.gz	X-11537	TRUE	reported	QgsV1h	2	TRUE	333768	0.00736636	19.9032
rs6723705	A	G	A	G	0.0411	-0.0033	0.5871	0.6158	FALSE	FALSE	FALSE	0twTqn	0.6439	0.0072	IBS	TRUE	reported	textfile	0.0081	3.46e-07	1756	M32854.metal.pos.txt.gz	X-11537	TRUE	reported	QgsV1h	2	TRUE	333768	0.01445	25.7169
rs6763260	T	C	T	C	0.03	-0.0113	0.6335	0.6427	FALSE	FALSE	FALSE	0twTqn	0.1216	0.0073	IBS	TRUE	reported	textfile	0.0067	7.756e-06	2684	M32854.metal.pos.txt.gz	X-11537	TRUE	reported	QgsV1h	2	TRUE	333768	0.00741444	20.0341
rs7559623	A	G	A	G	0.0631	-0.0036	0.0545	0.0561	FALSE	FALSE	FALSE	0twTqn	0.8065	0.0148	IBS	TRUE	reported	textfile	0.0143	9.58e-06	2684	M32854.metal.pos.txt.gz	X-11537	TRUE	reported	QgsV1h	2	TRUE	333768	0.0072022	19.4564
rs10242455	A	G	A	G	0.2212	0.0209	0.9335	0.9299	FALSE	FALSE	FALSE	AVxbSp	0.1179	0.0133	IBS	TRUE	reported	textfile	0.0099	1.67e-109	6797	M33415.metal.pos.txt.gz	X-12063	TRUE	reported	mSSmHh	2	TRUE	333768	0.0684229	499.082
rs1121592	T	C	T	C	-0.0343	-0.0022	0.54	0.5378	FALSE	FALSE	FALSE	AVxbSp	0.7478	0.0068	IBS	TRUE	reported	textfile	0.005	6.383e-12	6797	M33415.metal.pos.txt.gz	X-12063	TRUE	reported	mSSmHh	2	TRUE	333768	0.00687598	47.0458
rs11591344	A	T	A	T	-0.045	-0.0342	0.0643	0.0619	FALSE	TRUE	FALSE	AVxbSp	0.01584	0.0142	IBS	TRUE	reported	textfile	0.0099	5.049e-06	6797	M33415.metal.pos.txt.gz	X-12063	TRUE	reported	mSSmHh	2	TRUE	333768	0.00303053	20.6551
rs11644920	A	T	A	T	-0.0233	0.008	0.6891	0.6874	FALSE	TRUE	FALSE	AVxbSp	0.2852	0.0075	IBS	TRUE	reported	textfile	0.0052	6.851e-06	6797	M33415.metal.pos.txt.gz	X-12063	TRUE	reported	mSSmHh	2	TRUE	333768	0.00294515	20.0714
rs11768283	A	G	A	G	0.05	-0.0231	0.0589	0.0667	FALSE	FALSE	FALSE	AVxbSp	0.1144	0.0146	IBS	TRUE	reported	textfile	0.011	5.899e-06	6797	M33415.metal.pos.txt.gz	X-12063	TRUE	reported	mSSmHh	2	TRUE	333768	0.00303053	20.6551
rs13174155	T	G	T	G	-0.024	-0.004	0.4549	0.4584	FALSE	FALSE	FALSE	AVxbSp	0.5582	0.0068	IBS	TRUE	reported	textfile	0.005	1.816e-06	6797	M33415.metal.pos.txt.gz	X-12063	TRUE	reported	mSSmHh	2	TRUE	333768	0.00337828	23.0332
rs13230554	T	C	T	C	-0.1701	-0.0468	0.016	0.0195	FALSE	FALSE	FALSE	AVxbSp	0.07111	0.0259	IBS	TRUE	reported	textfile	0.0209	4.312e-16	6797	M33415.metal.pos.txt.gz	X-12063	TRUE	reported	mSSmHh	2	TRUE	333768	0.00965132	66.2199
rs1883349	A	G	A	G	-0.0318	-0.015	0.1609	0.1665	FALSE	FALSE	FALSE	AVxbSp	0.1067	0.0093	IBS	TRUE	reported	textfile	0.0068	2.476e-06	6797	M33415.metal.pos.txt.gz	X-12063	TRUE	reported	mSSmHh	2	TRUE	333768	0.00320719	21.8629
rs2267282	A	G	A	G	0.0227	-0.0054	0.2957	0.3024	FALSE	FALSE	FALSE	AVxbSp	0.4636	0.0074	IBS	TRUE	reported	textfile	0.0051	9.854e-06	6797	M33415.metal.pos.txt.gz	X-12063	TRUE	reported	mSSmHh	2	TRUE	333768	0.00290623	19.8054
rs2417971	A	G	A	G	-0.0401	-0.0026	0.2843	0.2928	FALSE	FALSE	FALSE	AVxbSp	0.7282	0.0075	IBS	TRUE	reported	textfile	0.0058	3.83e-12	6797	M33415.metal.pos.txt.gz	X-12063	TRUE	reported	mSSmHh	2	TRUE	333768	0.00698348	47.7865
rs296396	T	C	T	C	-0.0409	0.005	0.1628	0.1597	FALSE	FALSE	FALSE	AVxbSp	0.5982	0.0094	IBS	TRUE	reported	textfile	0.0067	1.055e-09	6797	M33415.metal.pos.txt.gz	X-12063	TRUE	reported	mSSmHh	2	TRUE	333768	0.00545262	37.2537
rs335124	A	G	A	G	0.023	-0.0071	0.285	0.288	FALSE	FALSE	FALSE	AVxbSp	0.3454	0.0076	IBS	TRUE	reported	textfile	0.0052	8.615e-06	6797	M33415.metal.pos.txt.gz	X-12063	TRUE	reported	mSSmHh	2	TRUE	333768	0.00287001	19.5579
rs4149056	T	C	T	C	-0.1176	-0.0146	0.8379	0.8464	FALSE	FALSE	FALSE	AVxbSp	0.122	0.0094	IBS	TRUE	reported	textfile	0.0065	1.258e-73	6797	M33415.metal.pos.txt.gz	X-12063	TRUE	reported	mSSmHh	2	TRUE	333768	0.0459456	327.235
rs4917639	A	C	A	C	-0.0362	0.0018	0.8015	0.8046	FALSE	FALSE	FALSE	AVxbSp	0.8311	0.0086	IBS	TRUE	reported	textfile	0.006	1.394e-09	6797	M33415.metal.pos.txt.gz	X-12063	TRUE	reported	mSSmHh	2	TRUE	333768	0.00532694	36.3904
rs4968836	A	C	A	C	0.0536	-0.0021	0.594	0.6556	FALSE	FALSE	FALSE	AVxbSp	0.771	0.0074	IBS	TRUE	reported	textfile	0.0105	3.545e-07	1698	M33415.metal.pos.txt.gz	X-12063	TRUE	reported	mSSmHh	2	TRUE	333768	0.0151147	26.0279
rs6544713	T	C	T	C	-0.0314	-0.0157	0.3211	0.3211	FALSE	FALSE	FALSE	AVxbSp	0.03197	0.0073	IBS	TRUE	reported	textfile	0.0051	8.97e-10	6797	M33415.metal.pos.txt.gz	X-12063	TRUE	reported	mSSmHh	2	TRUE	333768	0.00554608	37.8958
rs6719679	A	G	A	G	0.0276	-0.0076	0.7751	0.7734	FALSE	FALSE	FALSE	AVxbSp	0.3613	0.0083	IBS	TRUE	reported	textfile	0.0058	2.196e-06	6797	M33415.metal.pos.txt.gz	X-12063	TRUE	reported	mSSmHh	2	TRUE	333768	0.00332048	22.6378
rs11934821	A	G	A	G	0.0354	0.0077	0.8122	0.8115	FALSE	FALSE	FALSE	tzTuox	0.3763	0.0087	IBS	TRUE	reported	textfile	0.0079	7.798e-06	4323	M33633.metal.pos.txt.gz	X-12212	TRUE	reported	mAV0xC	2	TRUE	333768	0.00462333	20.0702
rs12071172	A	G	A	G	0.0934	0.0404	0.0265	0.0337	FALSE	FALSE	FALSE	tzTuox	0.0333	0.019	IBS	TRUE	reported	textfile	0.0206	5.583e-06	4323	M33633.metal.pos.txt.gz	X-12212	TRUE	reported	mAV0xC	2	TRUE	333768	0.00473275	20.5475
rs1246172	A	G	A	G	0.0328	-0.0043	0.2836	0.3026	FALSE	FALSE	FALSE	tzTuox	0.5658	0.0075	IBS	TRUE	reported	textfile	0.007	2.516e-06	4323	M33633.metal.pos.txt.gz	X-12212	TRUE	reported	mAV0xC	2	TRUE	333768	0.0050532	21.9458
rs13376835	A	G	A	G	-0.0401	-0.0002	0.8266	0.833	FALSE	FALSE	FALSE	tzTuox	0.9801	0.0092	IBS	TRUE	reported	textfile	0.0082	1.133e-06	4323	M33633.metal.pos.txt.gz	X-12212	TRUE	reported	mAV0xC	2	TRUE	333768	0.00550149	23.9034
rs1434384	A	G	A	G	-0.0305	-0.0099	0.5567	0.5566	FALSE	FALSE	FALSE	tzTuox	0.1581	0.007	IBS	TRUE	reported	textfile	0.0062	7.151e-07	4323	M33633.metal.pos.txt.gz	X-12212	TRUE	reported	mAV0xC	2	TRUE	333768	0.00556681	24.1889
rs17090140	A	G	A	G	0.0636	0.0169	0.0502	0.0512	FALSE	FALSE	FALSE	tzTuox	0.2933	0.0161	IBS	TRUE	reported	textfile	0.0142	7.072e-06	4323	M33633.metal.pos.txt.gz	X-12212	TRUE	reported	mAV0xC	2	TRUE	333768	0.00461893	20.051
rs2283530	A	G	A	G	0.1788	0.0278	0.0497	0.0532	FALSE	FALSE	FALSE	tzTuox	0.08265	0.016	IBS	TRUE	reported	textfile	0.0401	8.264e-06	1189	M33633.metal.pos.txt.gz	X-12212	TRUE	reported	mAV0xC	2	TRUE	333768	0.0164461	19.8479
rs2933259	T	C	T	C	-0.0278	0.0057	0.5499	0.54	FALSE	FALSE	FALSE	tzTuox	0.4037	0.0069	IBS	TRUE	reported	textfile	0.0062	6.527e-06	4323	M33633.metal.pos.txt.gz	X-12212	TRUE	reported	mAV0xC	2	TRUE	333768	0.0046292	20.0958
rs6599251	T	G	T	G	-0.028	-0.0033	0.553	0.5537	FALSE	FALSE	FALSE	tzTuox	0.6287	0.0069	IBS	TRUE	reported	textfile	0.0062	5.412e-06	4323	M33633.metal.pos.txt.gz	X-12212	TRUE	reported	mAV0xC	2	TRUE	333768	0.00469573	20.386
rs6917152	A	C	A	C	0.0893	0.0321	0.0265	0.0282	FALSE	FALSE	FALSE	tzTuox	0.1256	0.021	IBS	TRUE	reported	textfile	0.0195	4.916e-06	4323	M33633.metal.pos.txt.gz	X-12212	TRUE	reported	mAV0xC	2	TRUE	333768	0.00482777	20.962
rs7231703	A	T	A	T	0.035	-0.0014	0.3913	0.3941	FALSE	TRUE	FALSE	tzTuox	0.8442	0.007	IBS	TRUE	reported	textfile	0.0069	3.668e-07	4323	M33633.metal.pos.txt.gz	X-12212	TRUE	reported	mAV0xC	2	TRUE	333768	0.00591664	25.718
rs10059896	T	C	T	C	-0.0083	0.0055	0.786	0.78	FALSE	FALSE	FALSE	aTNFOl	0.5222	0.0085	IBS	TRUE	reported	textfile	0.0018	5.626e-06	7354	M33955.metal.pos.txt.gz	1-palmitoylglycerophosphocholine	TRUE	reported	kU1KNy	2	TRUE	333768	0.00288293	21.2566
rs10283250	A	C	A	C	0.0119	0.0151	0.1254	0.1185	FALSE	FALSE	FALSE	aTNFOl	0.1565	0.0106	IBS	TRUE	reported	textfile	0.0027	9.118e-06	7354	M33955.metal.pos.txt.gz	1-palmitoylglycerophosphocholine	TRUE	reported	kU1KNy	2	TRUE	333768	0.00263449	19.42
rs10814589	A	G	A	G	0.0086	-0.0225	0.3122	0.3137	FALSE	FALSE	FALSE	aTNFOl	0.002945	0.0076	IBS	TRUE	reported	textfile	0.0018	1.533e-06	7354	M33955.metal.pos.txt.gz	1-palmitoylglycerophosphocholine	TRUE	reported	kU1KNy	2	TRUE	333768	0.00309444	22.821
rs10913710	A	G	A	G	0.0081	-0.0015	0.212	0.2144	FALSE	FALSE	FALSE	aTNFOl	0.8534	0.0083	IBS	TRUE	reported	textfile	0.0018	8.901e-06	7354	M33955.metal.pos.txt.gz	1-palmitoylglycerophosphocholine	TRUE	reported	kU1KNy	2	TRUE	333768	0.00274604	20.2445
rs10953026	A	G	A	G	-0.008	0.0056	0.6177	0.6039	FALSE	FALSE	FALSE	aTNFOl	0.4218	0.007	IBS	TRUE	reported	textfile	0.0018	5.852e-06	7354	M33955.metal.pos.txt.gz	1-palmitoylglycerophosphocholine	TRUE	reported	kU1KNy	2	TRUE	333768	0.00267884	19.7477
rs10966017	A	G	A	G	-0.0085	-0.0019	0.2684	0.2976	FALSE	FALSE	FALSE	aTNFOl	0.8176	0.0082	IBS	TRUE	reported	textfile	0.0018	3.228e-06	7354	M33955.metal.pos.txt.gz	1-palmitoylglycerophosphocholine	TRUE	reported	kU1KNy	2	TRUE	333768	0.00302311	22.2933
rs11654527	T	G	T	G	0.0081	0.0052	0.1988	0.1949	FALSE	FALSE	FALSE	aTNFOl	0.5448	0.0086	IBS	TRUE	reported	textfile	0.0018	8.238e-06	7354	M33955.metal.pos.txt.gz	1-palmitoylglycerophosphocholine	TRUE	reported	kU1KNy	2	TRUE	333768	0.00274604	20.2445
rs1235119	A	T	A	T	-0.013	0.0184	0.8949	0.8728	FALSE	TRUE	FALSE	aTNFOl	0.1	0.0112	IBS	TRUE	reported	textfile	0.0027	1.075e-06	7354	M33955.metal.pos.txt.gz	1-palmitoylglycerophosphocholine	TRUE	reported	kU1KNy	2	TRUE	333768	0.00314245	23.1761
rs12880914	T	C	T	C	-0.0085	0.0082	0.7389	0.7367	FALSE	FALSE	FALSE	aTNFOl	0.2901	0.0077	IBS	TRUE	reported	textfile	0.0018	2.449e-06	7354	M33955.metal.pos.txt.gz	1-palmitoylglycerophosphocholine	TRUE	reported	kU1KNy	2	TRUE	333768	0.00302311	22.2933
rs1433098	T	G	T	G	0.008	-0.0018	0.6439	0.6403	FALSE	FALSE	FALSE	aTNFOl	0.7999	0.0072	IBS	TRUE	reported	textfile	0.0018	8.135e-06	7354	M33955.metal.pos.txt.gz	1-palmitoylglycerophosphocholine	TRUE	reported	kU1KNy	2	TRUE	333768	0.00267884	19.7477
rs1442583	A	G	A	G	-0.017	0.0006	0.0594	0.0632	FALSE	FALSE	FALSE	aTNFOl	0.9644	0.014	IBS	TRUE	reported	textfile	0.0036	1.942e-06	7354	M33955.metal.pos.txt.gz	1-palmitoylglycerophosphocholine	TRUE	reported	kU1KNy	2	TRUE	333768	0.00302311	22.2933
rs17814868	A	G	A	G	-0.0081	-0.0049	0.7346	0.7423	FALSE	FALSE	FALSE	aTNFOl	0.555	0.0083	IBS	TRUE	reported	textfile	0.0018	8.404e-06	7354	M33955.metal.pos.txt.gz	1-palmitoylglycerophosphocholine	TRUE	reported	kU1KNy	2	TRUE	333768	0.00274604	20.2445
rs1822906	A	G	A	G	0.0099	-0.0128	0.2032	0.2011	FALSE	FALSE	FALSE	aTNFOl	0.1336	0.0086	IBS	TRUE	reported	textfile	0.0018	8.787e-08	7354	M33955.metal.pos.txt.gz	1-palmitoylglycerophosphocholine	TRUE	reported	kU1KNy	2	TRUE	333768	0.00409656	30.2418
rs1875897	A	G	A	G	0.009	-0.0075	0.257	0.2702	FALSE	FALSE	FALSE	aTNFOl	0.3325	0.0077	IBS	TRUE	reported	textfile	0.002	6.795e-06	5590	M33955.metal.pos.txt.gz	1-palmitoylglycerophosphocholine	TRUE	reported	kU1KNy	2	TRUE	333768	0.00360946	20.2428
rs2273534	T	C	T	C	0.019	-0.0083	0.947	0.9452	FALSE	FALSE	FALSE	aTNFOl	0.6206	0.0167	IBS	TRUE	reported	textfile	0.0037	4.198e-07	7354	M33955.metal.pos.txt.gz	1-palmitoylglycerophosphocholine	TRUE	reported	kU1KNy	2	TRUE	333768	0.00357294	26.3624
rs2490289	T	C	T	C	0.0096	-0.0083	0.2222	0.228	FALSE	FALSE	FALSE	aTNFOl	0.3109	0.0082	IBS	TRUE	reported	textfile	0.0018	1.529e-07	7354	M33955.metal.pos.txt.gz	1-palmitoylglycerophosphocholine	TRUE	reported	kU1KNy	2	TRUE	333768	0.00385298	28.4367
rs2748805	T	C	T	C	0.0085	-0.0068	0.3004	0.3159	FALSE	FALSE	FALSE	aTNFOl	0.3596	0.0074	IBS	TRUE	reported	textfile	0.0018	2.305e-06	7354	M33955.metal.pos.txt.gz	1-palmitoylglycerophosphocholine	TRUE	reported	kU1KNy	2	TRUE	333768	0.00302311	22.2933
rs353694	A	G	A	G	-0.0085	0.0022	0.4518	0.4556	FALSE	FALSE	FALSE	aTNFOl	0.755	0.0072	IBS	TRUE	reported	textfile	0.0018	4.094e-06	7354	M33955.metal.pos.txt.gz	1-palmitoylglycerophosphocholine	TRUE	reported	kU1KNy	2	TRUE	333768	0.00302311	22.2933
rs3735474	A	G	A	G	-0.0165	0.0092	0.9341	0.9291	FALSE	FALSE	FALSE	aTNFOl	0.4923	0.0134	IBS	TRUE	reported	textfile	0.0036	3.972e-06	7354	M33955.metal.pos.txt.gz	1-palmitoylglycerophosphocholine	TRUE	reported	kU1KNy	2	TRUE	333768	0.0028484	21.0012
rs3851441	C	G	C	G	-0.0087	0.0023	0.2195	0.2162	FALSE	TRUE	FALSE	aTNFOl	0.7823	0.0083	IBS	TRUE	reported	textfile	0.0018	2.301e-06	7354	M33955.metal.pos.txt.gz	1-palmitoylglycerophosphocholine	TRUE	reported	kU1KNy	2	TRUE	333768	0.00316659	23.3548
rs4414129	T	C	T	C	-0.0161	0.0249	0.9342	0.931	FALSE	FALSE	FALSE	aTNFOl	0.07956	0.0142	IBS	TRUE	reported	textfile	0.0036	7.996e-06	7354	M33955.metal.pos.txt.gz	1-palmitoylglycerophosphocholine	TRUE	reported	kU1KNy	2	TRUE	333768	0.00271234	19.9953
rs4459845	A	C	A	C	0.0084	-0.0008	0.8009	0.8031	FALSE	FALSE	FALSE	aTNFOl	0.9248	0.0086	IBS	TRUE	reported	textfile	0.0018	5.081e-06	7354	M33955.metal.pos.txt.gz	1-palmitoylglycerophosphocholine	TRUE	reported	kU1KNy	2	TRUE	333768	0.00295261	21.7719
rs474566	A	G	A	G	0.0116	-0.0143	0.8714	0.8694	FALSE	FALSE	FALSE	aTNFOl	0.1589	0.0101	IBS	TRUE	reported	textfile	0.0026	9.861e-06	7354	M33955.metal.pos.txt.gz	1-palmitoylglycerophosphocholine	TRUE	reported	kU1KNy	2	TRUE	333768	0.00269943	19.8999
rs476092	A	C	A	C	0.0083	0.0193	0.2852	0.2836	FALSE	FALSE	FALSE	aTNFOl	0.02646	0.0087	IBS	TRUE	reported	textfile	0.0018	3.247e-06	7354	M33955.metal.pos.txt.gz	1-palmitoylglycerophosphocholine	TRUE	reported	kU1KNy	2	TRUE	333768	0.00288293	21.2566
rs6714201	A	G	A	G	0.0081	0.006	0.483	0.4979	FALSE	FALSE	FALSE	aTNFOl	0.3906	0.007	IBS	TRUE	reported	textfile	0.0018	4.407e-06	7354	M33955.metal.pos.txt.gz	1-palmitoylglycerophosphocholine	TRUE	reported	kU1KNy	2	TRUE	333768	0.00274604	20.2445
rs6777718	T	G	T	G	-0.0086	-0.0025	0.2783	0.2788	FALSE	FALSE	FALSE	aTNFOl	0.7409	0.0077	IBS	TRUE	reported	textfile	0.0019	3.508e-06	7354	M33955.metal.pos.txt.gz	1-palmitoylglycerophosphocholine	TRUE	reported	kU1KNy	2	TRUE	333768	0.00277816	20.482
rs7124459	T	C	T	C	-0.008	0.0087	0.3757	0.3708	FALSE	FALSE	FALSE	aTNFOl	0.2152	0.007	IBS	TRUE	reported	textfile	0.0018	7.576e-06	7354	M33955.metal.pos.txt.gz	1-palmitoylglycerophosphocholine	TRUE	reported	kU1KNy	2	TRUE	333768	0.00267884	19.7477
rs7547153	A	G	A	G	-0.0086	0.0114	0.5893	0.5872	FALSE	FALSE	FALSE	aTNFOl	0.1044	0.007	IBS	TRUE	reported	textfile	0.0018	1.133e-06	7354	M33955.metal.pos.txt.gz	1-palmitoylglycerophosphocholine	TRUE	reported	kU1KNy	2	TRUE	333768	0.00309444	22.821
rs7759176	T	G	T	G	0.0082	0.0041	0.2976	0.2897	FALSE	FALSE	FALSE	aTNFOl	0.6066	0.0079	IBS	TRUE	reported	textfile	0.0018	4.345e-06	7354	M33955.metal.pos.txt.gz	1-palmitoylglycerophosphocholine	TRUE	reported	kU1KNy	2	TRUE	333768	0.00281407	20.7474
rs8028440	T	C	T	C	0.0095	-0.0269	0.2136	0.216	FALSE	FALSE	FALSE	aTNFOl	0.001939	0.0087	IBS	TRUE	reported	textfile	0.0019	3.145e-07	7354	M33955.metal.pos.txt.gz	1-palmitoylglycerophosphocholine	TRUE	reported	kU1KNy	2	TRUE	333768	0.00338799	24.9932
rs804572	T	G	T	G	-0.0372	0.0284	0.0607	0.0649	FALSE	FALSE	FALSE	aTNFOl	0.04394	0.0141	IBS	TRUE	reported	textfile	0.0082	5.716e-06	1764	M33955.metal.pos.txt.gz	1-palmitoylglycerophosphocholine	TRUE	reported	kU1KNy	2	TRUE	333768	0.0115325	20.5573
rs8052052	T	G	T	G	-0.0096	0.003	0.2037	0.1963	FALSE	FALSE	FALSE	aTNFOl	0.7274	0.0087	IBS	TRUE	reported	textfile	0.0018	1.855e-07	7354	M33955.metal.pos.txt.gz	1-palmitoylglycerophosphocholine	TRUE	reported	kU1KNy	2	TRUE	333768	0.00385298	28.4367
rs9318232	T	C	T	C	-0.0104	0.0064	0.2312	0.2386	FALSE	FALSE	FALSE	aTNFOl	0.4247	0.008	IBS	TRUE	reported	textfile	0.002	1.045e-07	7354	M33955.metal.pos.txt.gz	1-palmitoylglycerophosphocholine	TRUE	reported	kU1KNy	2	TRUE	333768	0.00366344	27.0326
rs9880529	T	C	T	C	0.0117	-0.0049	0.8762	0.8649	FALSE	FALSE	FALSE	aTNFOl	0.6308	0.0102	IBS	TRUE	reported	textfile	0.0026	7.472e-06	7354	M33955.metal.pos.txt.gz	1-palmitoylglycerophosphocholine	TRUE	reported	kU1KNy	2	TRUE	333768	0.00274604	20.2445
rs10004910	A	G	A	G	0.017	-0.006	0.5629	0.561	FALSE	FALSE	FALSE	OI9dAk	0.4054	0.0072	IBS	TRUE	reported	textfile	0.0034	5.583e-07	7345	M33972.metal.pos.txt.gz	10-nonadecenoate (19:1n9)	TRUE	reported	xKgtHo	2	TRUE	333768	0.00339213	24.9932
rs10098688	A	C	A	C	0.0263	-0.0129	0.337	0.3359	FALSE	FALSE	FALSE	OI9dAk	0.0742	0.0072	IBS	TRUE	reported	textfile	0.0059	8.248e-06	1766	M33972.metal.pos.txt.gz	10-nonadecenoate (19:1n9)	TRUE	reported	xKgtHo	2	TRUE	333768	0.0111265	19.8479
rs1348656	T	C	T	C	-0.0232	0.0127	0.798	0.7991	FALSE	FALSE	FALSE	OI9dAk	0.1355	0.0085	IBS	TRUE	reported	textfile	0.0042	3.459e-08	7345	M33972.metal.pos.txt.gz	10-nonadecenoate (19:1n9)	TRUE	reported	xKgtHo	2	TRUE	333768	0.004137	30.5042
rs35350	A	G	A	G	0.0621	0.0043	0.9681	0.9712	FALSE	FALSE	FALSE	OI9dAk	0.846	0.0223	IBS	TRUE	reported	textfile	0.0131	2.156e-06	7345	M33972.metal.pos.txt.gz	10-nonadecenoate (19:1n9)	TRUE	reported	xKgtHo	2	TRUE	333768	0.00305016	22.4658
rs530942	A	G	A	G	-0.0373	0.0281	0.86	0.8676	FALSE	FALSE	FALSE	OI9dAk	0.01627	0.0117	IBS	TRUE	reported	textfile	0.0081	4.687e-06	1766	M33972.metal.pos.txt.gz	10-nonadecenoate (19:1n9)	TRUE	reported	xKgtHo	2	TRUE	333768	0.0118651	21.1814
rs703138	T	G	T	G	0.0152	0.0011	0.3743	0.3816	FALSE	FALSE	FALSE	OI9dAk	0.8787	0.007	IBS	TRUE	reported	textfile	0.0034	8.619e-06	7345	M33972.metal.pos.txt.gz	10-nonadecenoate (19:1n9)	TRUE	reported	xKgtHo	2	TRUE	333768	0.00271367	19.9807
rs7677730	T	C	T	C	0.0151	0.0018	0.4936	0.4962	FALSE	FALSE	FALSE	OI9dAk	0.7871	0.0068	IBS	TRUE	reported	textfile	0.0034	7.582e-06	7345	M33972.metal.pos.txt.gz	10-nonadecenoate (19:1n9)	TRUE	reported	xKgtHo	2	TRUE	333768	0.00267818	19.7187
rs10010466	T	G	T	G	0.0214	0.006	0.6845	0.6919	FALSE	FALSE	FALSE	CIgpFh	0.4181	0.0074	IBS	TRUE	reported	textfile	0.0043	6.532e-07	4800	M34539.metal.pos.txt.gz	X-12855	TRUE	reported	u3kVnQ	2	TRUE	333768	0.00513351	24.7577
rs11042916	T	C	T	C	0.0226	0.0031	0.2479	0.2414	FALSE	FALSE	FALSE	CIgpFh	0.6993	0.008	IBS	TRUE	reported	textfile	0.0044	2.804e-07	4800	M34539.metal.pos.txt.gz	X-12855	TRUE	reported	u3kVnQ	2	TRUE	333768	0.00546625	26.3712
rs11117202	T	C	T	C	-0.0353	-0.0062	0.6066	0.6113	FALSE	FALSE	FALSE	CIgpFh	0.4099	0.0076	IBS	TRUE	reported	textfile	0.008	9.756e-06	738	M34539.metal.pos.txt.gz	X-12855	TRUE	reported	u3kVnQ	2	TRUE	333768	0.0257042	19.4174
rs1171614	T	C	T	C	-0.0263	-0.0144	0.2232	0.2287	FALSE	FALSE	FALSE	CIgpFh	0.07884	0.0082	IBS	TRUE	reported	textfile	0.0047	2.549e-08	4800	M34539.metal.pos.txt.gz	X-12855	TRUE	reported	u3kVnQ	2	TRUE	333768	0.00648113	31.2993
rs12083933	T	C	T	C	0.0274	0.0172	0.1261	0.1348	FALSE	FALSE	FALSE	CIgpFh	0.08699	0.0101	IBS	TRUE	reported	textfile	0.006	4.495e-06	4800	M34539.metal.pos.txt.gz	X-12855	TRUE	reported	u3kVnQ	2	TRUE	333768	0.00432588	20.8458
rs12136754	A	C	A	C	0.026	-0.0065	0.3343	0.3352	FALSE	FALSE	FALSE	CIgpFh	0.3676	0.0072	IBS	TRUE	reported	textfile	0.0043	1.235e-09	4800	M34539.metal.pos.txt.gz	X-12855	TRUE	reported	u3kVnQ	2	TRUE	333768	0.00755915	36.5451
rs12323577	A	G	A	G	-0.0737	-0.0213	0.0169	0.0197	FALSE	FALSE	FALSE	CIgpFh	0.4529	0.0283	IBS	TRUE	reported	textfile	0.0165	8.328e-06	4800	M34539.metal.pos.txt.gz	X-12855	TRUE	reported	u3kVnQ	2	TRUE	333768	0.00413928	19.9428
rs12621754	T	C	T	C	-0.1607	-0.1244	0.0102	0.0187	FALSE	FALSE	FALSE	CIgpFh	0.127	0.0815	IBS	TRUE	reported	textfile	0.0363	9.467e-06	738	M34539.metal.pos.txt.gz	X-12855	TRUE	reported	u3kVnQ	2	TRUE	333768	0.025869	19.5452
rs1490956	A	G	A	G	0.0362	0.0138	0.8464	0.8162	FALSE	FALSE	FALSE	CIgpFh	0.2038	0.0109	IBS	TRUE	reported	textfile	0.0079	4.018e-06	4800	M34539.metal.pos.txt.gz	X-12855	TRUE	reported	u3kVnQ	2	TRUE	333768	0.00435538	20.9885
rs1711005	A	G	A	G	-0.0279	-0.0052	0.1356	0.1468	FALSE	FALSE	FALSE	CIgpFh	0.6167	0.0105	IBS	TRUE	reported	textfile	0.0059	2.082e-06	4800	M34539.metal.pos.txt.gz	X-12855	TRUE	reported	u3kVnQ	2	TRUE	333768	0.00463708	22.3524
rs17187240	T	C	T	C	-0.0607	0.0319	0.9712	0.9721	FALSE	FALSE	FALSE	CIgpFh	0.1285	0.021	IBS	TRUE	reported	textfile	0.0132	3.911e-06	4800	M34539.metal.pos.txt.gz	X-12855	TRUE	reported	u3kVnQ	2	TRUE	333768	0.00438611	21.1373
rs2026781	C	G	C	G	0.0351	0.0089	0.7702	0.7372	FALSE	TRUE	FALSE	CIgpFh	0.3106	0.0088	IBS	TRUE	reported	textfile	0.0076	3.832e-06	4800	M34539.metal.pos.txt.gz	X-12855	TRUE	reported	u3kVnQ	2	TRUE	333768	0.00442405	21.3209
rs2230604	T	C	T	C	0.0309	0.0159	0.0848	0.0853	FALSE	FALSE	FALSE	CIgpFh	0.1934	0.0123	IBS	TRUE	reported	textfile	0.007	9.997e-06	4800	M34539.metal.pos.txt.gz	X-12855	TRUE	reported	u3kVnQ	2	TRUE	333768	0.00404315	19.4778
rs2246344	T	G	T	G	-0.0197	-0.0097	0.7691	0.7675	FALSE	FALSE	FALSE	CIgpFh	0.2311	0.0081	IBS	TRUE	reported	textfile	0.0044	7.934e-06	4800	M34539.metal.pos.txt.gz	X-12855	TRUE	reported	u3kVnQ	2	TRUE	333768	0.00415888	20.0376
rs3751563	A	G	A	G	0.0288	0.0065	0.1086	0.1106	FALSE	FALSE	FALSE	CIgpFh	0.5947	0.0122	IBS	TRUE	reported	textfile	0.0062	3.028e-06	4800	M34539.metal.pos.txt.gz	X-12855	TRUE	reported	u3kVnQ	2	TRUE	333768	0.0044752	21.5685
rs6802120	T	C	T	C	0.0241	0.019	0.1586	0.1558	FALSE	FALSE	FALSE	CIgpFh	0.04301	0.0094	IBS	TRUE	reported	textfile	0.0052	3.99e-06	4800	M34539.metal.pos.txt.gz	X-12855	TRUE	reported	u3kVnQ	2	TRUE	333768	0.00445499	21.4707
rs7340748	A	G	A	G	0.0437	0.0082	0.0539	0.0966	FALSE	FALSE	FALSE	CIgpFh	0.5204	0.0127	IBS	TRUE	reported	textfile	0.0097	5.922e-06	4800	M34539.metal.pos.txt.gz	X-12855	TRUE	reported	u3kVnQ	2	TRUE	333768	0.00421062	20.288
rs837767	A	G	A	G	0.0238	0.0023	0.1777	0.1922	FALSE	FALSE	FALSE	CIgpFh	0.7956	0.0089	IBS	TRUE	reported	textfile	0.0054	9.601e-06	4800	M34539.metal.pos.txt.gz	X-12855	TRUE	reported	u3kVnQ	2	TRUE	333768	0.00403061	19.4171
rs9348403	T	C	T	C	-0.0207	0.0043	0.6666	0.6637	FALSE	FALSE	FALSE	CIgpFh	0.5618	0.0074	IBS	TRUE	reported	textfile	0.0043	1.611e-06	4800	M34539.metal.pos.txt.gz	X-12855	TRUE	reported	u3kVnQ	2	TRUE	333768	0.00480475	23.1645
rs9832461	A	G	A	G	-0.0203	-0.0058	0.7731	0.7773	FALSE	FALSE	FALSE	CIgpFh	0.4882	0.0084	IBS	TRUE	reported	textfile	0.0044	4.095e-06	4800	M34539.metal.pos.txt.gz	X-12855	TRUE	reported	u3kVnQ	2	TRUE	333768	0.00441493	21.2768
rs10211153	T	G	T	G	-0.0128	-0.0098	0.4131	0.404	FALSE	FALSE	FALSE	L5D9kO	0.1563	0.0069	IBS	TRUE	reported	textfile	0.0027	2.898e-06	6543	M35193.metal.pos.txt.gz	X-13435	TRUE	reported	d1ZFGd	2	TRUE	333768	0.00342315	22.4678
rs11150996	T	C	T	C	-0.0158	-0.0082	0.6181	0.5897	FALSE	FALSE	FALSE	L5D9kO	0.2369	0.007	IBS	TRUE	reported	textfile	0.0034	3.543e-06	6543	M35193.metal.pos.txt.gz	X-13435	TRUE	reported	d1ZFGd	2	TRUE	333768	0.00328964	21.5886
rs12071803	A	G	A	G	-0.0122	-0.0092	0.3609	0.3557	FALSE	FALSE	FALSE	L5D9kO	0.1986	0.0071	IBS	TRUE	reported	textfile	0.0028	9.921e-06	6543	M35193.metal.pos.txt.gz	X-13435	TRUE	reported	d1ZFGd	2	TRUE	333768	0.00289313	18.9789
rs12352994	T	C	T	C	0.0184	0.0037	0.8104	0.813	FALSE	FALSE	FALSE	L5D9kO	0.6762	0.0088	IBS	TRUE	reported	textfile	0.0036	2.544e-07	6543	M35193.metal.pos.txt.gz	X-13435	TRUE	reported	d1ZFGd	2	TRUE	333768	0.0039767	26.1155
rs13197516	T	C	T	C	-0.0396	-0.001	0.0369	0.0422	FALSE	FALSE	FALSE	L5D9kO	0.9535	0.0179	IBS	TRUE	reported	textfile	0.008	6.633e-07	6543	M35193.metal.pos.txt.gz	X-13435	TRUE	reported	d1ZFGd	2	TRUE	333768	0.00373087	24.495
rs13390982	T	C	T	C	0.024	-0.0134	0.9232	0.9217	FALSE	FALSE	FALSE	L5D9kO	0.2986	0.0129	IBS	TRUE	reported	textfile	0.0053	6.564e-06	6543	M35193.metal.pos.txt.gz	X-13435	TRUE	reported	d1ZFGd	2	TRUE	333768	0.00312417	20.4993
rs16865980	A	G	A	G	-0.0162	-0.0085	0.2149	0.2179	FALSE	FALSE	FALSE	L5D9kO	0.3291	0.0087	IBS	TRUE	reported	textfile	0.0036	6.318e-06	6543	M35193.metal.pos.txt.gz	X-13435	TRUE	reported	d1ZFGd	2	TRUE	333768	0.00308536	20.2438
rs1853936	T	C	T	C	0.021	-0.0146	0.1762	0.1888	FALSE	FALSE	FALSE	L5D9kO	0.1007	0.0089	IBS	TRUE	reported	textfile	0.0043	8.96e-07	6543	M35193.metal.pos.txt.gz	X-13435	TRUE	reported	d1ZFGd	2	TRUE	333768	0.00363199	23.8434
rs1991108	T	C	T	C	-0.0183	0.002	0.1597	0.1621	FALSE	FALSE	FALSE	L5D9kO	0.8309	0.0094	IBS	TRUE	reported	textfile	0.0037	5.765e-07	6543	M35193.metal.pos.txt.gz	X-13435	TRUE	reported	d1ZFGd	2	TRUE	333768	0.00372478	24.4549
rs2062541	A	G	A	G	0.0196	-0.0037	0.615	0.6108	FALSE	FALSE	FALSE	L5D9kO	0.5922	0.007	IBS	TRUE	reported	textfile	0.0027	5.758e-13	6543	M35193.metal.pos.txt.gz	X-13435	TRUE	reported	d1ZFGd	2	TRUE	333768	0.00798958	52.6807
rs2278350	A	C	A	C	-0.0159	0.0052	0.3247	0.3479	FALSE	FALSE	FALSE	L5D9kO	0.4684	0.0072	IBS	TRUE	reported	textfile	0.0035	4.621e-06	6543	M35193.metal.pos.txt.gz	X-13435	TRUE	reported	d1ZFGd	2	TRUE	333768	0.00314422	20.6312
rs2326537	A	T	A	T	-0.1064	0.0649	0.0294	0.0399	FALSE	TRUE	FALSE	L5D9kO	0.0003088	0.018	IBS	TRUE	reported	textfile	0.0206	2.426e-07	1525	M35193.metal.pos.txt.gz	X-13435	TRUE	reported	d1ZFGd	2	TRUE	333768	0.0171928	26.6427
rs2378668	A	C	A	C	0.0138	-0.0107	0.3623	0.3592	FALSE	FALSE	FALSE	L5D9kO	0.1346	0.0071	IBS	TRUE	reported	textfile	0.0027	5.035e-07	6543	M35193.metal.pos.txt.gz	X-13435	TRUE	reported	d1ZFGd	2	TRUE	333768	0.0039767	26.1155
rs274567	T	C	T	C	0.0144	-0.0037	0.3687	0.3704	FALSE	FALSE	FALSE	L5D9kO	0.6028	0.0071	IBS	TRUE	reported	textfile	0.0027	1.229e-07	6543	M35193.metal.pos.txt.gz	X-13435	TRUE	reported	d1ZFGd	2	TRUE	333768	0.00432849	28.4357
rs3752192	A	G	A	G	0.0124	0.004	0.5526	0.5541	FALSE	FALSE	FALSE	L5D9kO	0.5658	0.0069	IBS	TRUE	reported	textfile	0.0027	5.049e-06	6543	M35193.metal.pos.txt.gz	X-13435	TRUE	reported	d1ZFGd	2	TRUE	333768	0.00321323	21.0855
rs4536931	C	G	C	G	-0.0494	0.0503	0.0288	0.0568	FALSE	TRUE	FALSE	L5D9kO	0.002281	0.0165	IBS	TRUE	reported	textfile	0.0102	1.373e-06	6543	M35193.metal.pos.txt.gz	X-13435	TRUE	reported	d1ZFGd	2	TRUE	333768	0.00357209	23.4488
rs4960438	T	C	T	C	-0.0125	-0.0036	0.6378	0.6388	FALSE	FALSE	FALSE	L5D9kO	0.6088	0.0071	IBS	TRUE	reported	textfile	0.0027	4.754e-06	6543	M35193.metal.pos.txt.gz	X-13435	TRUE	reported	d1ZFGd	2	TRUE	333768	0.00326509	21.4269
rs6107820	A	G	A	G	-0.0121	0.0072	0.5819	0.5871	FALSE	FALSE	FALSE	L5D9kO	0.2954	0.0069	IBS	TRUE	reported	textfile	0.0027	9.952e-06	6543	M35193.metal.pos.txt.gz	X-13435	TRUE	reported	d1ZFGd	2	TRUE	333768	0.0030601	20.0775
rs6734857	A	T	A	T	-0.0221	0.0219	0.1629	0.1866	FALSE	TRUE	FALSE	L5D9kO	0.02058	0.0095	IBS	TRUE	reported	textfile	0.005	8.509e-06	6543	M35193.metal.pos.txt.gz	X-13435	TRUE	reported	d1ZFGd	2	TRUE	333768	0.00297696	19.5304
rs6817210	A	C	A	C	-0.0123	-0.007	0.5169	0.5241	FALSE	FALSE	FALSE	L5D9kO	0.3052	0.0068	IBS	TRUE	reported	textfile	0.0027	6.578e-06	6543	M35193.metal.pos.txt.gz	X-13435	TRUE	reported	d1ZFGd	2	TRUE	333768	0.00316177	20.7467
rs6973126	T	C	T	C	0.0122	0.0043	0.5122	0.5244	FALSE	FALSE	FALSE	L5D9kO	0.53	0.0068	IBS	TRUE	reported	textfile	0.0027	7.058e-06	6543	M35193.metal.pos.txt.gz	X-13435	TRUE	reported	d1ZFGd	2	TRUE	333768	0.00311073	20.4108
rs7942744	T	C	T	C	0.0124	0.002	0.556	0.5596	FALSE	FALSE	FALSE	L5D9kO	0.7739	0.0069	IBS	TRUE	reported	textfile	0.0027	6.415e-06	6543	M35193.metal.pos.txt.gz	X-13435	TRUE	reported	d1ZFGd	2	TRUE	333768	0.00321323	21.0855
rs9392556	T	C	T	C	-0.0358	0.0007	0.6581	0.6577	FALSE	FALSE	FALSE	L5D9kO	0.9222	0.0072	IBS	TRUE	reported	textfile	0.0028	4.028e-38	6543	M35193.metal.pos.txt.gz	X-13435	TRUE	reported	d1ZFGd	2	TRUE	333768	0.0243756	163.425
rs9588850	A	G	A	G	0.0159	-0.0092	0.2225	0.2237	FALSE	FALSE	FALSE	L5D9kO	0.2592	0.0082	IBS	TRUE	reported	textfile	0.0036	8.823e-06	6543	M35193.metal.pos.txt.gz	X-13435	TRUE	reported	d1ZFGd	2	TRUE	333768	0.00297248	19.501
rs9871214	T	G	T	G	-0.0161	0.0092	0.1789	0.1757	FALSE	FALSE	FALSE	L5D9kO	0.3024	0.0089	IBS	TRUE	reported	textfile	0.0036	8.391e-06	6543	M35193.metal.pos.txt.gz	X-13435	TRUE	reported	d1ZFGd	2	TRUE	333768	0.0030475	19.9947
rs10206899	T	C	T	C	0.025	-0.0018	0.7805	0.7799	FALSE	FALSE	FALSE	mMKo5m	0.8258	0.0082	IBS	TRUE	reported	textfile	0.0033	1.725e-14	5694	M35240.metal.pos.txt.gz	X-13477	TRUE	reported	9cH6vz	2	TRUE	333768	0.00997882	57.3719
rs10274162	T	G	T	G	-0.0136	-0.001	0.4586	0.4553	FALSE	FALSE	FALSE	mMKo5m	0.8934	0.0072	IBS	TRUE	reported	textfile	0.003	5.246e-06	5694	M35240.metal.pos.txt.gz	X-13477	TRUE	reported	9cH6vz	2	TRUE	333768	0.00359628	20.5439
rs1151428	A	G	A	G	-0.0178	0.0047	0.1545	0.16	FALSE	FALSE	FALSE	mMKo5m	0.6095	0.0093	IBS	TRUE	reported	textfile	0.0039	4.769e-06	5694	M35240.metal.pos.txt.gz	X-13477	TRUE	reported	9cH6vz	2	TRUE	333768	0.00364508	20.8237
rs11726946	A	G	A	G	-0.0187	0.0034	0.8837	0.8809	FALSE	FALSE	FALSE	mMKo5m	0.7518	0.0107	IBS	TRUE	reported	textfile	0.0042	9.318e-06	5694	M35240.metal.pos.txt.gz	X-13477	TRUE	reported	9cH6vz	2	TRUE	333768	0.00346943	19.8167
rs1188774	T	C	T	C	-0.0222	0.0099	0.0826	0.0842	FALSE	FALSE	FALSE	mMKo5m	0.4209	0.0123	IBS	TRUE	reported	textfile	0.005	9.955e-06	5694	M35240.metal.pos.txt.gz	X-13477	TRUE	reported	9cH6vz	2	TRUE	333768	0.00345023	19.7067
rs17022603	A	G	A	G	-0.0771	0.0316	0.9828	0.9872	FALSE	FALSE	FALSE	mMKo5m	0.3216	0.0319	IBS	TRUE	reported	textfile	0.0164	2.46e-06	1673	M35240.metal.pos.txt.gz	X-13477	TRUE	reported	9cH6vz	2	TRUE	333768	0.0130384	22.075
rs1981524	T	C	T	C	0.015	-0.0115	0.2032	0.19	FALSE	FALSE	FALSE	mMKo5m	0.1855	0.0087	IBS	TRUE	reported	textfile	0.0033	4.71e-06	5694	M35240.metal.pos.txt.gz	X-13477	TRUE	reported	9cH6vz	2	TRUE	333768	0.00361546	20.6539
rs6981610	A	G	A	G	0.0141	-0.0188	0.708	0.694	FALSE	FALSE	FALSE	mMKo5m	0.01238	0.0075	IBS	TRUE	reported	textfile	0.0032	7.911e-06	5694	M35240.metal.pos.txt.gz	X-13477	TRUE	reported	9cH6vz	2	TRUE	333768	0.00339815	19.4082
rs10019662	A	G	A	G	-0.0344	0.0126	0.441	0.439	FALSE	FALSE	FALSE	1eTwQl	0.06733	0.0069	IBS	TRUE	reported	textfile	0.0075	5.213e-06	1505	M35305.metal.pos.txt.gz	1-palmitoylglycerophosphoinositol*	TRUE	reported	xImU10	2	TRUE	333768	0.0137857	21.0096
rs10415849	T	C	T	C	-0.024	0.0078	0.1248	0.1215	FALSE	FALSE	FALSE	1eTwQl	0.4544	0.0104	IBS	TRUE	reported	textfile	0.0053	5.785e-06	5979	M35305.metal.pos.txt.gz	1-palmitoylglycerophosphoinositol*	TRUE	reported	xImU10	2	TRUE	333768	0.00341787	20.4987
rs10491073	T	C	T	C	0.1279	-0.0387	0.0171	0.0223	FALSE	FALSE	FALSE	1eTwQl	0.09847	0.0234	IBS	TRUE	reported	textfile	0.0267	1.641e-06	1505	M35305.metal.pos.txt.gz	1-palmitoylglycerophosphoinositol*	TRUE	reported	xImU10	2	TRUE	333768	0.0150179	22.9161
rs12210574	T	C	T	C	-0.0167	0.0001	0.4836	0.4678	FALSE	FALSE	FALSE	1eTwQl	0.9931	0.0069	IBS	TRUE	reported	textfile	0.0036	3.057e-06	5979	M35305.metal.pos.txt.gz	1-palmitoylglycerophosphoinositol*	TRUE	reported	xImU10	2	TRUE	333768	0.00358624	21.5121
rs1386540	T	C	T	C	-0.0361	-0.0054	0.3484	0.3572	FALSE	FALSE	FALSE	1eTwQl	0.4504	0.0071	IBS	TRUE	reported	textfile	0.0074	1.137e-06	1505	M35305.metal.pos.txt.gz	1-palmitoylglycerophosphoinositol*	TRUE	reported	xImU10	2	TRUE	333768	0.0155668	23.7669
rs1507362	T	C	T	C	0.0333	-0.0107	0.3901	0.391	FALSE	FALSE	FALSE	1eTwQl	0.1267	0.007	IBS	TRUE	reported	textfile	0.0071	3.019e-06	1505	M35305.metal.pos.txt.gz	1-palmitoylglycerophosphoinositol*	TRUE	reported	xImU10	2	TRUE	333768	0.0144057	21.9682
rs1554690	A	C	A	C	0.0158	-0.0059	0.5949	0.595	FALSE	FALSE	FALSE	1eTwQl	0.4028	0.0071	IBS	TRUE	reported	textfile	0.0035	8.168e-06	5979	M35305.metal.pos.txt.gz	1-palmitoylglycerophosphoinositol*	TRUE	reported	xImU10	2	TRUE	333768	0.00339681	20.372
rs2702042	T	C	T	C	-0.0157	0.0034	0.35	0.3491	FALSE	FALSE	FALSE	1eTwQl	0.6361	0.0072	IBS	TRUE	reported	textfile	0.0035	8.897e-06	5979	M35305.metal.pos.txt.gz	1-palmitoylglycerophosphoinositol*	TRUE	reported	xImU10	2	TRUE	333768	0.0033541	20.1149
rs3993153	T	G	T	G	0.0197	0.0046	0.8085	0.7924	FALSE	FALSE	FALSE	1eTwQl	0.6056	0.0089	IBS	TRUE	reported	textfile	0.0045	9.918e-06	5979	M35305.metal.pos.txt.gz	1-palmitoylglycerophosphoinositol*	TRUE	reported	xImU10	2	TRUE	333768	0.00319513	19.1585
rs7800039	A	G	A	G	-0.0169	0.0003	0.3424	0.3471	FALSE	FALSE	FALSE	1eTwQl	0.9639	0.0072	IBS	TRUE	reported	textfile	0.0036	2.13e-06	5979	M35305.metal.pos.txt.gz	1-palmitoylglycerophosphoinositol*	TRUE	reported	xImU10	2	TRUE	333768	0.00367233	22.0304
rs8083552	A	G	A	G	-0.0161	-0.0004	0.3479	0.3506	FALSE	FALSE	FALSE	1eTwQl	0.9567	0.0072	IBS	TRUE	reported	textfile	0.0036	5.688e-06	5979	M35305.metal.pos.txt.gz	1-palmitoylglycerophosphoinositol*	TRUE	reported	xImU10	2	TRUE	333768	0.00333402	19.9941
rs10082970	T	C	T	C	-0.0451	-0.0153	0.1881	0.1859	FALSE	FALSE	FALSE	UyKgO0	0.09579	0.0092	IBS	TRUE	reported	textfile	0.0088	2.989e-07	5035	M35551.metal.pos.txt.gz	X-13741	TRUE	reported	bPfpxq	2	TRUE	333768	0.00518954	26.2552
rs10818386	T	C	T	C	0.0395	0.0015	0.1967	0.1929	FALSE	FALSE	FALSE	UyKgO0	0.8672	0.0087	IBS	TRUE	reported	textfile	0.0089	8.681e-06	5035	M35551.metal.pos.txt.gz	X-13741	TRUE	reported	bPfpxq	2	TRUE	333768	0.0038969	19.6898
rs1159296	T	C	T	C	-0.061	0.007	0.7444	0.7299	FALSE	FALSE	FALSE	UyKgO0	0.3839	0.0081	IBS	TRUE	reported	textfile	0.0135	6.598e-06	1340	M35551.metal.pos.txt.gz	X-13741	TRUE	reported	bPfpxq	2	TRUE	333768	0.0150079	20.3865
rs12189736	T	C	T	C	-0.0642	0.0077	0.8963	0.8916	FALSE	FALSE	FALSE	UyKgO0	0.4862	0.011	IBS	TRUE	reported	textfile	0.0114	1.559e-08	5035	M35551.metal.pos.txt.gz	X-13741	TRUE	reported	bPfpxq	2	TRUE	333768	0.00625942	31.7021
rs17167889	T	C	T	C	-0.0852	0.0161	0.9594	0.9563	FALSE	FALSE	FALSE	UyKgO0	0.3374	0.0168	IBS	TRUE	reported	textfile	0.0176	1.299e-06	5035	M35551.metal.pos.txt.gz	X-13741	TRUE	reported	bPfpxq	2	TRUE	333768	0.00463274	23.4251
rs215934	T	C	T	C	0.043	0.001	0.1585	0.1541	FALSE	FALSE	FALSE	UyKgO0	0.9192	0.0095	IBS	TRUE	reported	textfile	0.0093	3.584e-06	5035	M35551.metal.pos.txt.gz	X-13741	TRUE	reported	bPfpxq	2	TRUE	333768	0.00422797	21.3697
rs4841110	A	G	A	G	0.0342	-0.0196	0.5869	0.59	FALSE	FALSE	FALSE	UyKgO0	0.005108	0.007	IBS	TRUE	reported	textfile	0.0073	2.604e-06	5035	M35551.metal.pos.txt.gz	X-13741	TRUE	reported	bPfpxq	2	TRUE	333768	0.00434028	21.9399
rs6942053	C	G	C	G	0.033	-0.0088	0.4176	0.412	FALSE	TRUE	FALSE	UyKgO0	0.2026	0.0069	IBS	TRUE	reported	textfile	0.0072	4.767e-06	5035	M35551.metal.pos.txt.gz	X-13741	TRUE	reported	bPfpxq	2	TRUE	333768	0.00415485	20.9986
rs7171302	C	G	C	G	-0.0438	0.0099	0.2838	0.2932	FALSE	TRUE	FALSE	UyKgO0	0.2095	0.0079	IBS	TRUE	reported	textfile	0.0083	1.537e-07	5035	M35551.metal.pos.txt.gz	X-13741	TRUE	reported	bPfpxq	2	TRUE	333768	0.00550044	27.8368
rs7326215	T	C	T	C	0.0495	-0.0052	0.8718	0.8764	FALSE	FALSE	FALSE	UyKgO0	0.6191	0.0104	IBS	TRUE	reported	textfile	0.0103	1.491e-06	5035	M35551.metal.pos.txt.gz	X-13741	TRUE	reported	bPfpxq	2	TRUE	333768	0.00456614	23.0868
rs9784679	T	C	T	C	0.0363	-0.0054	0.2789	0.2732	FALSE	FALSE	FALSE	UyKgO0	0.4869	0.0077	IBS	TRUE	reported	textfile	0.008	6.198e-06	5035	M35551.metal.pos.txt.gz	X-13741	TRUE	reported	bPfpxq	2	TRUE	333768	0.0040725	20.5807
rs9849918	A	C	A	C	0.0363	-0.0132	0.6538	0.6611	FALSE	FALSE	FALSE	UyKgO0	0.06844	0.0072	IBS	TRUE	reported	textfile	0.0073	7.736e-07	5035	M35551.metal.pos.txt.gz	X-13741	TRUE	reported	bPfpxq	2	TRUE	333768	0.00488698	24.717
rs10505870	A	G	A	G	0.0245	0.0053	0.2706	0.2788	FALSE	FALSE	FALSE	BUFqxc	0.5028	0.008	IBS	TRUE	reported	textfile	0.0055	9.303e-06	5629	M35669.metal.pos.txt.gz	tetradecanedioate	TRUE	reported	C5mUNT	2	TRUE	333768	0.00351275	19.8359
rs12317268	A	G	A	G	-0.1008	-0.0136	0.8342	0.8447	FALSE	FALSE	FALSE	BUFqxc	0.1486	0.0094	IBS	TRUE	reported	textfile	0.0062	4.161e-60	5629	M35669.metal.pos.txt.gz	tetradecanedioate	TRUE	reported	C5mUNT	2	TRUE	333768	0.0448515	264.231
rs12485842	T	C	T	C	0.102	0.0105	0.0771	0.0568	FALSE	FALSE	FALSE	BUFqxc	0.4827	0.015	IBS	TRUE	reported	textfile	0.0224	5.396e-06	659	M35669.metal.pos.txt.gz	tetradecanedioate	TRUE	reported	C5mUNT	2	TRUE	333768	0.0305046	20.6721
rs13221063	A	G	A	G	-0.0294	-0.0134	0.8289	0.8268	FALSE	FALSE	FALSE	BUFqxc	0.1593	0.0095	IBS	TRUE	reported	textfile	0.0064	4.776e-06	5629	M35669.metal.pos.txt.gz	tetradecanedioate	TRUE	reported	C5mUNT	2	TRUE	333768	0.00373489	21.095
rs16967085	C	G	C	G	-0.0207	-0.0045	0.3734	0.3732	FALSE	TRUE	FALSE	BUFqxc	0.5248	0.007	IBS	TRUE	reported	textfile	0.0046	6.343e-06	5629	M35669.metal.pos.txt.gz	tetradecanedioate	TRUE	reported	C5mUNT	2	TRUE	333768	0.00358455	20.2428
rs17244095	A	C	A	C	-0.0439	-0.0091	0.1095	0.1669	FALSE	FALSE	FALSE	BUFqxc	0.3623	0.01	IBS	TRUE	reported	textfile	0.0095	3.996e-06	5629	M35669.metal.pos.txt.gz	tetradecanedioate	TRUE	reported	C5mUNT	2	TRUE	333768	0.00377925	21.3465
rs17564907	A	G	A	G	-0.045	0.0029	0.9315	0.9043	FALSE	FALSE	FALSE	BUFqxc	0.8009	0.0116	IBS	TRUE	reported	textfile	0.0097	3.968e-06	5629	M35669.metal.pos.txt.gz	tetradecanedioate	TRUE	reported	C5mUNT	2	TRUE	333768	0.00380884	21.5143
rs17661642	C	G	C	G	-0.0441	-0.0058	0.9412	0.9394	FALSE	TRUE	FALSE	BUFqxc	0.6871	0.0143	IBS	TRUE	reported	textfile	0.0097	5.568e-06	5629	M35669.metal.pos.txt.gz	tetradecanedioate	TRUE	reported	C5mUNT	2	TRUE	333768	0.00365856	20.6623
rs1988344	T	C	T	C	-0.0362	0.0164	0.9117	0.9123	FALSE	FALSE	FALSE	BUFqxc	0.1725	0.012	IBS	TRUE	reported	textfile	0.0081	7.946e-06	5629	M35669.metal.pos.txt.gz	tetradecanedioate	TRUE	reported	C5mUNT	2	TRUE	333768	0.00353572	19.9661
rs2127434	A	G	A	G	0.0284	0.0038	0.7956	0.7806	FALSE	FALSE	FALSE	BUFqxc	0.656	0.0086	IBS	TRUE	reported	textfile	0.0061	3.226e-06	5629	M35669.metal.pos.txt.gz	tetradecanedioate	TRUE	reported	C5mUNT	2	TRUE	333768	0.00383598	21.6682
rs2468240	A	G	A	G	-0.0226	-0.0141	0.5882	0.5851	FALSE	FALSE	FALSE	BUFqxc	0.04246	0.007	IBS	TRUE	reported	textfile	0.0046	1.014e-06	5629	M35669.metal.pos.txt.gz	tetradecanedioate	TRUE	reported	C5mUNT	2	TRUE	333768	0.00426984	24.1294
rs2554887	A	T	A	T	0.0282	0.0017	0.683	0.6833	FALSE	TRUE	FALSE	BUFqxc	0.841	0.0083	IBS	TRUE	reported	textfile	0.0053	1.294e-07	5629	M35669.metal.pos.txt.gz	tetradecanedioate	TRUE	reported	C5mUNT	2	TRUE	333768	0.00500422	28.3004
rs2566347	A	C	A	C	-0.0262	-0.0078	0.2063	0.2054	FALSE	FALSE	FALSE	BUFqxc	0.3556	0.0084	IBS	TRUE	reported	textfile	0.0056	2.444e-06	5629	M35669.metal.pos.txt.gz	tetradecanedioate	TRUE	reported	C5mUNT	2	TRUE	333768	0.00387356	21.8813
rs4149032	T	C	T	C	-0.0521	-0.005	0.3294	0.3346	FALSE	FALSE	FALSE	BUFqxc	0.4843	0.0072	IBS	TRUE	reported	textfile	0.0054	3.667e-22	5629	M35669.metal.pos.txt.gz	tetradecanedioate	TRUE	reported	C5mUNT	2	TRUE	333768	0.016268	93.0537
rs4551320	T	G	T	G	0.0434	0.0125	0.0759	0.104	FALSE	FALSE	FALSE	BUFqxc	0.2698	0.0113	IBS	TRUE	reported	textfile	0.0093	2.881e-06	5629	M35669.metal.pos.txt.gz	tetradecanedioate	TRUE	reported	C5mUNT	2	TRUE	333768	0.00385394	21.77
rs4799429	T	C	T	C	-0.0213	-0.0007	0.48	0.4816	FALSE	FALSE	FALSE	BUFqxc	0.9228	0.0068	IBS	TRUE	reported	textfile	0.0046	3.272e-06	5629	M35669.metal.pos.txt.gz	tetradecanedioate	TRUE	reported	C5mUNT	2	TRUE	333768	0.00379456	21.4333
rs6663731	A	T	A	T	0.0624	0.0136	0.8857	0.8687	FALSE	TRUE	FALSE	BUFqxc	0.1766	0.0101	IBS	TRUE	reported	textfile	0.0081	1.385e-14	5629	M35669.metal.pos.txt.gz	tetradecanedioate	TRUE	reported	C5mUNT	2	TRUE	333768	0.0104331	59.326
rs7023732	A	G	A	G	0.0369	0.0186	0.0811	0.086	FALSE	FALSE	FALSE	BUFqxc	0.1335	0.0124	IBS	TRUE	reported	textfile	0.0083	8.073e-06	5629	M35669.metal.pos.txt.gz	tetradecanedioate	TRUE	reported	C5mUNT	2	TRUE	333768	0.00349899	19.758
rs704622	T	C	T	C	-0.3467	0.002	0.9863	0.9876	FALSE	FALSE	FALSE	BUFqxc	0.9532	0.0347	IBS	TRUE	reported	textfile	0.0712	1.133e-06	659	M35669.metal.pos.txt.gz	tetradecanedioate	TRUE	reported	C5mUNT	2	TRUE	333768	0.0347305	23.6389
rs7233515	A	G	A	G	-0.0211	-0.0048	0.3974	0.3964	FALSE	FALSE	FALSE	BUFqxc	0.4876	0.007	IBS	TRUE	reported	textfile	0.0046	4.741e-06	5629	M35669.metal.pos.txt.gz	tetradecanedioate	TRUE	reported	C5mUNT	2	TRUE	333768	0.0037239	21.0327
rs8192287	T	G	T	G	0.0522	0.0225	0.0436	0.0602	FALSE	FALSE	FALSE	BUFqxc	0.1192	0.0145	IBS	TRUE	reported	textfile	0.0115	5.842e-06	5629	M35669.metal.pos.txt.gz	tetradecanedioate	TRUE	reported	C5mUNT	2	TRUE	333768	0.00364693	20.5964
rs10505870	A	G	A	G	0.0252	0.0053	0.2707	0.2788	FALSE	FALSE	FALSE	b7luLa	0.5028	0.008	IBS	TRUE	reported	textfile	0.0053	1.886e-06	6447	M35678.metal.pos.txt.gz	hexadecanedioate	TRUE	reported	zkvxCi	2	TRUE	333768	0.00349439	22.6003
rs10770126	A	G	A	G	0.0205	-0.0069	0.5547	0.5696	FALSE	FALSE	FALSE	b7luLa	0.3193	0.0069	IBS	TRUE	reported	textfile	0.0044	2.681e-06	6447	M35678.metal.pos.txt.gz	hexadecanedioate	TRUE	reported	zkvxCi	2	TRUE	333768	0.00335571	21.7004
rs10869648	A	G	A	G	-0.0211	-0.0033	0.4086	0.4099	FALSE	FALSE	FALSE	b7luLa	0.6324	0.0069	IBS	TRUE	reported	textfile	0.0044	1.371e-06	6447	M35678.metal.pos.txt.gz	hexadecanedioate	TRUE	reported	zkvxCi	2	TRUE	333768	0.00355431	22.9893
rs11720619	T	C	T	C	0.0233	0.0122	0.2508	0.2472	FALSE	FALSE	FALSE	b7luLa	0.1219	0.0079	IBS	TRUE	reported	textfile	0.0051	4.864e-06	6447	M35678.metal.pos.txt.gz	hexadecanedioate	TRUE	reported	zkvxCi	2	TRUE	333768	0.00322708	20.8659
rs12070845	A	G	A	G	0.0414	-0.0176	0.0702	0.0856	FALSE	FALSE	FALSE	b7luLa	0.1548	0.0123	IBS	TRUE	reported	textfile	0.0089	3.157e-06	6447	M35678.metal.pos.txt.gz	hexadecanedioate	TRUE	reported	zkvxCi	2	TRUE	333768	0.00334509	21.6315
rs12464103	A	G	A	G	0.0297	-0.0043	0.1572	0.1627	FALSE	FALSE	FALSE	b7luLa	0.6554	0.0096	IBS	TRUE	reported	textfile	0.006	8.236e-07	6447	M35678.metal.pos.txt.gz	hexadecanedioate	TRUE	reported	zkvxCi	2	TRUE	333768	0.00378622	24.4949
rs12714232	T	C	T	C	-0.02	0.0031	0.5232	0.5137	FALSE	FALSE	FALSE	b7luLa	0.657	0.0069	IBS	TRUE	reported	textfile	0.0044	7.067e-06	6447	M35678.metal.pos.txt.gz	hexadecanedioate	TRUE	reported	zkvxCi	2	TRUE	333768	0.00319453	20.6547
rs13293473	C	G	C	G	-0.037	-0.0026	0.9111	0.908	FALSE	TRUE	FALSE	b7luLa	0.8278	0.0121	IBS	TRUE	reported	textfile	0.0076	1.298e-06	6447	M35678.metal.pos.txt.gz	hexadecanedioate	TRUE	reported	zkvxCi	2	TRUE	333768	0.0036629	23.6942
rs1578700	T	C	T	C	0.0303	-0.0037	0.1191	0.1299	FALSE	FALSE	FALSE	b7luLa	0.7221	0.0105	IBS	TRUE	reported	textfile	0.0068	8.448e-06	6447	M35678.metal.pos.txt.gz	hexadecanedioate	TRUE	reported	zkvxCi	2	TRUE	333768	0.00307025	19.8487
rs1871395	A	G	A	G	-0.0893	-0.0136	0.8326	0.8445	FALSE	FALSE	FALSE	b7luLa	0.1472	0.0094	IBS	TRUE	reported	textfile	0.0059	1.649e-52	6447	M35678.metal.pos.txt.gz	hexadecanedioate	TRUE	reported	zkvxCi	2	TRUE	333768	0.0343144	229.015
rs2286411	A	G	A	G	0.0327	-0.006	0.1197	0.1535	FALSE	FALSE	FALSE	b7luLa	0.5279	0.0095	IBS	TRUE	reported	textfile	0.0073	8.309e-06	6447	M35678.metal.pos.txt.gz	hexadecanedioate	TRUE	reported	zkvxCi	2	TRUE	333768	0.00310272	20.0593
rs3805895	A	C	A	C	0.0645	-0.0157	0.9764	0.9755	FALSE	FALSE	FALSE	b7luLa	0.4802	0.0222	IBS	TRUE	reported	textfile	0.0145	8.566e-06	6447	M35678.metal.pos.txt.gz	hexadecanedioate	TRUE	reported	zkvxCi	2	TRUE	333768	0.00305981	19.781
rs4149032	T	C	T	C	-0.0498	-0.005	0.3306	0.3346	FALSE	FALSE	FALSE	b7luLa	0.4843	0.0072	IBS	TRUE	reported	textfile	0.0051	9.876e-23	6447	M35678.metal.pos.txt.gz	hexadecanedioate	TRUE	reported	zkvxCi	2	TRUE	333768	0.0145742	95.3199
rs4972811	T	C	T	C	0.0204	0.0115	0.428	0.4279	FALSE	FALSE	FALSE	b7luLa	0.0979	0.007	IBS	TRUE	reported	textfile	0.0044	4.221e-06	6447	M35678.metal.pos.txt.gz	hexadecanedioate	TRUE	reported	zkvxCi	2	TRUE	333768	0.00332316	21.4892
rs6663731	A	T	A	T	0.0452	0.0136	0.8823	0.8687	FALSE	TRUE	FALSE	b7luLa	0.1766	0.0101	IBS	TRUE	reported	textfile	0.0069	5.492e-11	6447	M35678.metal.pos.txt.gz	hexadecanedioate	TRUE	reported	zkvxCi	2	TRUE	333768	0.00661211	42.8987
rs6870033	A	T	A	T	-0.0238	-0.0053	0.7179	0.6912	FALSE	TRUE	FALSE	b7luLa	0.4761	0.0074	IBS	TRUE	reported	textfile	0.0052	4.137e-06	6447	M35678.metal.pos.txt.gz	hexadecanedioate	TRUE	reported	zkvxCi	2	TRUE	333768	0.00323877	20.9417
rs7023732	A	G	A	G	0.0396	0.0186	0.0795	0.086	FALSE	FALSE	FALSE	b7luLa	0.1335	0.0124	IBS	TRUE	reported	textfile	0.0079	6.347e-07	6447	M35678.metal.pos.txt.gz	hexadecanedioate	TRUE	reported	zkvxCi	2	TRUE	333768	0.0038823	25.1189
rs7265772	A	G	A	G	0.024	-0.0078	0.1918	0.1997	FALSE	FALSE	FALSE	b7luLa	0.3628	0.0085	IBS	TRUE	reported	textfile	0.0054	9.362e-06	6447	M35678.metal.pos.txt.gz	hexadecanedioate	TRUE	reported	zkvxCi	2	TRUE	333768	0.00305456	19.747
rs749008	A	G	A	G	-0.0197	-0.0102	0.6386	0.6315	FALSE	FALSE	FALSE	b7luLa	0.1495	0.0071	IBS	TRUE	reported	textfile	0.0044	7.646e-06	6447	M35678.metal.pos.txt.gz	hexadecanedioate	TRUE	reported	zkvxCi	2	TRUE	333768	0.00309971	20.0398
rs7523522	T	C	T	C	-0.0213	-0.0082	0.6548	0.6508	FALSE	FALSE	FALSE	b7luLa	0.2488	0.0071	IBS	TRUE	reported	textfile	0.0044	1.323e-06	6447	M35678.metal.pos.txt.gz	hexadecanedioate	TRUE	reported	zkvxCi	2	TRUE	333768	0.00362177	23.4271
rs7926241	A	G	A	G	0.0867	0.0217	0.0152	0.0155	FALSE	FALSE	FALSE	b7luLa	0.4606	0.0295	IBS	TRUE	reported	textfile	0.0187	3.562e-06	6447	M35678.metal.pos.txt.gz	hexadecanedioate	TRUE	reported	zkvxCi	2	TRUE	333768	0.00332316	21.4892
rs9304337	A	G	A	G	0.0206	0.004	0.5538	0.5573	FALSE	FALSE	FALSE	b7luLa	0.5548	0.0068	IBS	TRUE	reported	textfile	0.0044	2.263e-06	6447	M35678.metal.pos.txt.gz	hexadecanedioate	TRUE	reported	zkvxCi	2	TRUE	333768	0.00338842	21.9126
rs9487538	A	G	A	G	0.0504	0.0174	0.0402	0.0412	FALSE	FALSE	FALSE	b7luLa	0.3165	0.0173	IBS	TRUE	reported	textfile	0.0113	7.671e-06	6447	M35678.metal.pos.txt.gz	hexadecanedioate	TRUE	reported	zkvxCi	2	TRUE	333768	0.00307616	19.887
rs9587762	T	C	T	C	0.0273	0.0033	0.187	0.1869	FALSE	FALSE	FALSE	b7luLa	0.7097	0.009	IBS	TRUE	reported	textfile	0.0061	7.768e-06	6447	M35678.metal.pos.txt.gz	hexadecanedioate	TRUE	reported	zkvxCi	2	TRUE	333768	0.00309714	20.0231
rs1022302	T	C	T	C	-0.0223	-0.0162	0.3866	0.3779	FALSE	FALSE	FALSE	fLL3ee	0.02191	0.0071	IBS	TRUE	reported	textfile	0.005	9.914e-06	4529	M35978.metal.pos.txt.gz	X-14057	TRUE	reported	LD5GPc	2	TRUE	333768	0.00437285	19.8828
rs10267258	T	C	T	C	-0.0305	-0.0028	0.8786	0.8646	FALSE	FALSE	FALSE	fLL3ee	0.7795	0.01	IBS	TRUE	reported	textfile	0.0067	4.714e-06	4529	M35978.metal.pos.txt.gz	X-14057	TRUE	reported	LD5GPc	2	TRUE	333768	0.00455476	20.7137
rs10433495	T	C	T	C	0.055	0.0017	0.9624	0.9686	FALSE	FALSE	FALSE	fLL3ee	0.9306	0.0201	IBS	TRUE	reported	textfile	0.0122	6.671e-06	4529	M35978.metal.pos.txt.gz	X-14057	TRUE	reported	LD5GPc	2	TRUE	333768	0.00446744	20.3149
rs11184443	T	C	T	C	0.025	0.0166	0.2471	0.2526	FALSE	FALSE	FALSE	fLL3ee	0.03418	0.0078	IBS	TRUE	reported	textfile	0.0056	8.826e-06	4529	M35978.metal.pos.txt.gz	X-14057	TRUE	reported	LD5GPc	2	TRUE	333768	0.00438122	19.921
rs12681727	A	G	A	G	-0.0357	-0.0151	0.1333	0.1418	FALSE	FALSE	FALSE	fLL3ee	0.1601	0.0108	IBS	TRUE	reported	textfile	0.008	7.143e-06	4529	M35978.metal.pos.txt.gz	X-14057	TRUE	reported	LD5GPc	2	TRUE	333768	0.00437773	19.9051
rs12778305	T	G	T	G	0.0278	0.0037	0.37	0.3904	FALSE	FALSE	FALSE	fLL3ee	0.5938	0.007	IBS	TRUE	reported	textfile	0.0063	8.895e-06	4529	M35978.metal.pos.txt.gz	X-14057	TRUE	reported	LD5GPc	2	TRUE	333768	0.00428098	19.4633
rs1418811	T	G	T	G	0.0275	0.0091	0.8452	0.8428	FALSE	FALSE	FALSE	fLL3ee	0.3315	0.0093	IBS	TRUE	reported	textfile	0.0061	5.93e-06	4529	M35978.metal.pos.txt.gz	X-14057	TRUE	reported	LD5GPc	2	TRUE	333768	0.00446744	20.3149
rs1556831	T	G	T	G	0.0226	-0.0054	0.7471	0.7466	FALSE	FALSE	FALSE	fLL3ee	0.4923	0.0078	IBS	TRUE	reported	textfile	0.0051	9.192e-06	4529	M35978.metal.pos.txt.gz	X-14057	TRUE	reported	LD5GPc	2	TRUE	333768	0.00431713	19.6284
rs16928398	T	C	T	C	0.0623	-0.026	0.9707	0.9713	FALSE	FALSE	FALSE	fLL3ee	0.2221	0.0213	IBS	TRUE	reported	textfile	0.0136	4.567e-06	4529	M35978.metal.pos.txt.gz	X-14057	TRUE	reported	LD5GPc	2	TRUE	333768	0.00461199	20.9752
rs16936190	C	G	C	G	-0.1014	-0.0618	0.0247	0.0268	FALSE	TRUE	FALSE	fLL3ee	0.007338	0.023	IBS	TRUE	reported	textfile	0.0223	5.413e-06	1517	M35978.metal.pos.txt.gz	X-14057	TRUE	reported	LD5GPc	2	TRUE	333768	0.0134463	20.6487
rs2921448	A	G	A	G	0.0227	0.0126	0.2771	0.2821	FALSE	FALSE	FALSE	fLL3ee	0.09962	0.0076	IBS	TRUE	reported	textfile	0.005	5.246e-06	4529	M35978.metal.pos.txt.gz	X-14057	TRUE	reported	LD5GPc	2	TRUE	333768	0.00453041	20.6025
rs3789107	A	C	A	C	0.0636	0.0207	0.8931	0.8853	FALSE	FALSE	FALSE	fLL3ee	0.0793	0.0118	IBS	TRUE	reported	textfile	0.0133	1.901e-06	1517	M35978.metal.pos.txt.gz	X-14057	TRUE	reported	LD5GPc	2	TRUE	333768	0.01485	22.8369
rs4665383	C	G	C	G	-0.0254	-0.0201	0.7261	0.7457	FALSE	TRUE	FALSE	fLL3ee	0.01021	0.0078	IBS	TRUE	reported	textfile	0.0051	5.486e-07	4529	M35978.metal.pos.txt.gz	X-14057	TRUE	reported	LD5GPc	2	TRUE	333768	0.00544694	24.7934
rs4854073	T	C	T	C	-0.0224	0.0095	0.4114	0.4297	FALSE	FALSE	FALSE	fLL3ee	0.1833	0.0071	IBS	TRUE	reported	textfile	0.0046	1.246e-06	4529	M35978.metal.pos.txt.gz	X-14057	TRUE	reported	LD5GPc	2	TRUE	333768	0.00520847	23.7022
rs6751559	T	G	T	G	-0.0357	0.0043	0.8962	0.8992	FALSE	FALSE	FALSE	fLL3ee	0.7043	0.0113	IBS	TRUE	reported	textfile	0.0071	5.477e-07	4529	M35978.metal.pos.txt.gz	X-14057	TRUE	reported	LD5GPc	2	TRUE	333768	0.00555136	25.2713
rs6899809	T	C	T	C	-0.0554	-0.0257	0.0436	0.0501	FALSE	FALSE	FALSE	fLL3ee	0.1313	0.017	IBS	TRUE	reported	textfile	0.0123	7.204e-06	4529	M35978.metal.pos.txt.gz	X-14057	TRUE	reported	LD5GPc	2	TRUE	333768	0.00445929	20.2776
rs7619989	C	G	C	G	-0.0308	-0.0044	0.602	0.6187	FALSE	TRUE	FALSE	fLL3ee	0.5283	0.007	IBS	TRUE	reported	textfile	0.0068	5.822e-06	1517	M35978.metal.pos.txt.gz	X-14057	TRUE	reported	LD5GPc	2	TRUE	333768	0.0133433	20.4885
rs9877943	A	G	A	G	0.0244	0.009	0.2282	0.2214	FALSE	FALSE	FALSE	fLL3ee	0.271	0.0082	IBS	TRUE	reported	textfile	0.0054	5.992e-06	4529	M35978.metal.pos.txt.gz	X-14057	TRUE	reported	LD5GPc	2	TRUE	333768	0.00448783	20.408
rs10894263	A	C	A	C	0.0161	-0.0055	0.5535	0.5688	FALSE	FALSE	FALSE	TFRoUO	0.4541	0.0073	IBS	TRUE	reported	textfile	0.0035	4.841e-06	7184	M36300.metal.pos.txt.gz	X-14374	TRUE	reported	blvEWe	2	TRUE	333768	0.00293678	21.1541
rs10899916	T	C	T	C	0.0244	0.0035	0.3837	0.4063	FALSE	FALSE	FALSE	TFRoUO	0.618	0.0069	IBS	TRUE	reported	textfile	0.0051	2.066e-06	1732	M36300.metal.pos.txt.gz	X-14374	TRUE	reported	blvEWe	2	TRUE	333768	0.0130434	22.8632
rs11585904	C	G	C	G	0.0219	-0.01	0.1296	0.1598	FALSE	TRUE	FALSE	TFRoUO	0.2881	0.0094	IBS	TRUE	reported	textfile	0.0049	9.227e-06	7184	M36300.metal.pos.txt.gz	X-14374	TRUE	reported	blvEWe	2	TRUE	333768	0.00277283	19.9699
rs11670375	A	G	A	G	-0.0208	0.0096	0.864	0.8675	FALSE	FALSE	FALSE	TFRoUO	0.3592	0.0104	IBS	TRUE	reported	textfile	0.0044	2.711e-06	7184	M36300.metal.pos.txt.gz	X-14374	TRUE	reported	blvEWe	2	TRUE	333768	0.00310103	22.3409
rs1374273	A	G	A	G	0.0254	-0.0086	0.6234	0.6255	FALSE	FALSE	FALSE	TFRoUO	0.2216	0.0071	IBS	TRUE	reported	textfile	0.0052	1.047e-06	1732	M36300.metal.pos.txt.gz	X-14374	TRUE	reported	blvEWe	2	TRUE	333768	0.0135885	23.8319
rs1449969	A	G	A	G	-0.0156	0.0157	0.7512	0.7446	FALSE	FALSE	FALSE	TFRoUO	0.04646	0.0079	IBS	TRUE	reported	textfile	0.0034	5.275e-06	7184	M36300.metal.pos.txt.gz	X-14374	TRUE	reported	blvEWe	2	TRUE	333768	0.00292183	21.046
rs1557339	A	C	A	C	0.0275	-0.0254	0.7675	0.751	FALSE	FALSE	FALSE	TFRoUO	0.001434	0.008	IBS	TRUE	reported	textfile	0.006	4.415e-06	1732	M36300.metal.pos.txt.gz	X-14374	TRUE	reported	blvEWe	2	TRUE	333768	0.0119834	20.9827
rs4654649	T	C	T	C	0.0144	-0.0031	0.5518	0.5546	FALSE	FALSE	FALSE	TFRoUO	0.6567	0.0069	IBS	TRUE	reported	textfile	0.0032	8.49e-06	7184	M36300.metal.pos.txt.gz	X-14374	TRUE	reported	blvEWe	2	TRUE	333768	0.00281084	20.2444
rs6913176	T	C	T	C	0.082	-0.035	0.9804	0.987	FALSE	FALSE	FALSE	TFRoUO	0.2884	0.033	IBS	TRUE	reported	textfile	0.0177	3.799e-06	1732	M36300.metal.pos.txt.gz	X-14374	TRUE	reported	blvEWe	2	TRUE	333768	0.0122401	21.4378
rs11581618	A	G	A	G	-0.013	-0.0105	0.3437	0.3463	FALSE	FALSE	FALSE	uOLkdR	0.1431	0.0072	IBS	TRUE	reported	textfile	0.0029	6.594e-06	6464	M36553.metal.pos.txt.gz	X-14626	TRUE	reported	BADDiU	2	TRUE	333768	0.00309914	20.0889
rs12317268	A	G	A	G	-0.0536	-0.0136	0.8428	0.8447	FALSE	FALSE	FALSE	uOLkdR	0.1486	0.0094	IBS	TRUE	reported	textfile	0.0038	2.202e-45	6464	M36553.metal.pos.txt.gz	X-14626	TRUE	reported	BADDiU	2	TRUE	333768	0.0298604	198.897
rs1434665	A	T	A	T	-0.0129	-0.0119	0.7194	0.7131	FALSE	TRUE	FALSE	uOLkdR	0.1162	0.0076	IBS	TRUE	reported	textfile	0.0029	7.905e-06	6464	M36553.metal.pos.txt.gz	X-14626	TRUE	reported	BADDiU	2	TRUE	333768	0.00305179	19.781
rs17145556	T	C	T	C	-0.033	-0.0127	0.951	0.9432	FALSE	FALSE	FALSE	uOLkdR	0.3897	0.0148	IBS	TRUE	reported	textfile	0.0067	7.786e-07	6464	M36553.metal.pos.txt.gz	X-14626	TRUE	reported	BADDiU	2	TRUE	333768	0.00373895	24.2518
rs17651844	A	G	A	G	0.0441	-0.014	0.031	0.0344	FALSE	FALSE	FALSE	uOLkdR	0.4619	0.019	IBS	TRUE	reported	textfile	0.0092	1.521e-06	6464	M36553.metal.pos.txt.gz	X-14626	TRUE	reported	BADDiU	2	TRUE	333768	0.00354209	22.9703
rs17832807	C	G	C	G	0.0233	-0.001	0.1092	0.1396	FALSE	TRUE	FALSE	uOLkdR	0.9216	0.0106	IBS	TRUE	reported	textfile	0.0048	1.553e-06	6464	M36553.metal.pos.txt.gz	X-14626	TRUE	reported	BADDiU	2	TRUE	333768	0.00363202	23.5556
rs2581320	T	G	T	G	0.0214	0.0069	0.8846	0.8762	FALSE	FALSE	FALSE	uOLkdR	0.5021	0.0103	IBS	TRUE	reported	textfile	0.0047	6.199e-06	6464	M36553.metal.pos.txt.gz	X-14626	TRUE	reported	BADDiU	2	TRUE	333768	0.00319698	20.7251
rs3763941	T	C	T	C	0.0336	0.009	0.047	0.0478	FALSE	FALSE	FALSE	uOLkdR	0.5927	0.0169	IBS	TRUE	reported	textfile	0.0076	8.995e-06	6464	M36553.metal.pos.txt.gz	X-14626	TRUE	reported	BADDiU	2	TRUE	333768	0.00301466	19.5397
rs3790310	A	T	A	T	0.0177	0.0213	0.8295	0.8282	FALSE	TRUE	FALSE	uOLkdR	0.01894	0.0091	IBS	TRUE	reported	textfile	0.0038	3.462e-06	6464	M36553.metal.pos.txt.gz	X-14626	TRUE	reported	BADDiU	2	TRUE	333768	0.00334521	21.6893
rs4149034	A	G	A	G	-0.0221	-0.0052	0.3407	0.3344	FALSE	FALSE	FALSE	uOLkdR	0.4709	0.0072	IBS	TRUE	reported	textfile	0.0029	1.989e-14	6464	M36553.metal.pos.txt.gz	X-14626	TRUE	reported	BADDiU	2	TRUE	333768	0.00890436	58.0569
rs4610008	T	C	T	C	-0.0562	-0.0096	0.6607	0.5685	FALSE	FALSE	FALSE	uOLkdR	0.1657	0.0069	IBS	TRUE	reported	textfile	0.0123	5.204e-06	1260	M36553.metal.pos.txt.gz	X-14626	TRUE	reported	BADDiU	2	TRUE	333768	0.0162988	20.8436
rs4657463	C	G	C	G	0.0136	0.011	0.6945	0.6989	FALSE	TRUE	FALSE	uOLkdR	0.1381	0.0074	IBS	TRUE	reported	textfile	0.0029	2.8e-06	6464	M36553.metal.pos.txt.gz	X-14626	TRUE	reported	BADDiU	2	TRUE	333768	0.00339082	21.9861
rs4762693	A	G	A	G	0.0172	0.0051	0.2859	0.2913	FALSE	FALSE	FALSE	uOLkdR	0.5147	0.0079	IBS	TRUE	reported	textfile	0.0037	4.068e-06	6464	M36553.metal.pos.txt.gz	X-14626	TRUE	reported	BADDiU	2	TRUE	333768	0.00333198	21.6032
rs594084	T	C	T	C	-0.0131	-0.0027	0.6304	0.6354	FALSE	FALSE	FALSE	uOLkdR	0.7083	0.0072	IBS	TRUE	reported	textfile	0.0029	5.551e-06	6464	M36553.metal.pos.txt.gz	X-14626	TRUE	reported	BADDiU	2	TRUE	333768	0.00314685	20.3992
rs6563831	T	C	T	C	0.0136	0.0037	0.652	0.6439	FALSE	FALSE	FALSE	uOLkdR	0.6005	0.0072	IBS	TRUE	reported	textfile	0.0029	2.327e-06	6464	M36553.metal.pos.txt.gz	X-14626	TRUE	reported	BADDiU	2	TRUE	333768	0.00339082	21.9861
rs6771638	T	G	T	G	-0.0132	-0.0006	0.2911	0.2929	FALSE	FALSE	FALSE	uOLkdR	0.9387	0.0078	IBS	TRUE	reported	textfile	0.0029	5.384e-06	6464	M36553.metal.pos.txt.gz	X-14626	TRUE	reported	BADDiU	2	TRUE	333768	0.00319493	20.7118
rs6859143	A	G	A	G	0.0134	-0.0048	0.7032	0.6936	FALSE	FALSE	FALSE	uOLkdR	0.5142	0.0074	IBS	TRUE	reported	textfile	0.0029	3.549e-06	6464	M36553.metal.pos.txt.gz	X-14626	TRUE	reported	BADDiU	2	TRUE	333768	0.00329215	21.3442
rs7499206	T	C	T	C	0.014	0.0061	0.29	0.289	FALSE	FALSE	FALSE	uOLkdR	0.4193	0.0075	IBS	TRUE	reported	textfile	0.0029	1.404e-06	6464	M36553.metal.pos.txt.gz	X-14626	TRUE	reported	BADDiU	2	TRUE	333768	0.00359249	23.2984
rs10082235	T	C	T	C	-0.0385	-0.007	0.0735	0.0715	FALSE	FALSE	FALSE	OpJowc	0.6155	0.0139	IBS	TRUE	reported	textfile	0.0084	4.094e-06	7333	M37203.metal.pos.txt.gz	4-androsten-3beta,17beta-diol disulfate 2*	TRUE	reported	jMqRcI	2	TRUE	333768	0.00285653	21.0012
rs12508354	T	G	T	G	-0.0232	0.0031	0.328	0.3269	FALSE	FALSE	FALSE	OpJowc	0.6715	0.0073	IBS	TRUE	reported	textfile	0.0047	8.236e-07	7333	M37203.metal.pos.txt.gz	4-androsten-3beta,17beta-diol disulfate 2*	TRUE	reported	jMqRcI	2	TRUE	333768	0.00331175	24.3591
rs12521994	A	G	A	G	0.05	-0.0121	0.9559	0.9566	FALSE	FALSE	FALSE	OpJowc	0.476	0.017	IBS	TRUE	reported	textfile	0.0109	4.463e-06	7333	M37203.metal.pos.txt.gz	4-androsten-3beta,17beta-diol disulfate 2*	TRUE	reported	jMqRcI	2	TRUE	333768	0.00286128	21.0363
rs12525109	A	G	A	G	0.0244	-0.0078	0.771	0.7499	FALSE	FALSE	FALSE	OpJowc	0.3281	0.008	IBS	TRUE	reported	textfile	0.005	8.914e-07	7333	M37203.metal.pos.txt.gz	4-androsten-3beta,17beta-diol disulfate 2*	TRUE	reported	jMqRcI	2	TRUE	333768	0.00323705	23.8079
rs1337985	T	C	T	C	-0.0184	0.0039	0.627	0.6293	FALSE	FALSE	FALSE	OpJowc	0.5822	0.0071	IBS	TRUE	reported	textfile	0.0041	7.643e-06	7333	M37203.metal.pos.txt.gz	4-androsten-3beta,17beta-diol disulfate 2*	TRUE	reported	jMqRcI	2	TRUE	333768	0.00273902	20.1349
rs13419511	A	G	A	G	-0.0187	-0.0034	0.5995	0.5931	FALSE	FALSE	FALSE	OpJowc	0.618	0.0069	IBS	TRUE	reported	textfile	0.0041	5.783e-06	7333	M37203.metal.pos.txt.gz	4-androsten-3beta,17beta-diol disulfate 2*	TRUE	reported	jMqRcI	2	TRUE	333768	0.00282881	20.7968
rs1476117	A	G	A	G	0.0187	0.0026	0.5513	0.5411	FALSE	FALSE	FALSE	OpJowc	0.7059	0.0069	IBS	TRUE	reported	textfile	0.0041	5.857e-06	7333	M37203.metal.pos.txt.gz	4-androsten-3beta,17beta-diol disulfate 2*	TRUE	reported	jMqRcI	2	TRUE	333768	0.00282881	20.7968
rs2295709	T	C	T	C	0.0228	0.0056	0.7937	0.7813	FALSE	FALSE	FALSE	OpJowc	0.4965	0.0082	IBS	TRUE	reported	textfile	0.005	4.806e-06	7333	M37203.metal.pos.txt.gz	4-androsten-3beta,17beta-diol disulfate 2*	TRUE	reported	jMqRcI	2	TRUE	333768	0.0028276	20.7879
rs2762353	A	G	A	G	0.0299	0.0211	0.4536	0.4356	FALSE	FALSE	FALSE	OpJowc	0.002118	0.0069	IBS	TRUE	reported	textfile	0.0041	2.505e-13	7333	M37203.metal.pos.txt.gz	4-androsten-3beta,17beta-diol disulfate 2*	TRUE	reported	jMqRcI	2	TRUE	333768	0.00720037	53.1687
rs296396	T	C	T	C	-0.0298	0.005	0.1648	0.1597	FALSE	FALSE	FALSE	OpJowc	0.5982	0.0094	IBS	TRUE	reported	textfile	0.0056	1.262e-07	7333	M37203.metal.pos.txt.gz	4-androsten-3beta,17beta-diol disulfate 2*	TRUE	reported	jMqRcI	2	TRUE	333768	0.00384681	28.3099
rs3733475	T	G	T	G	-0.0221	0.0139	0.3611	0.4009	FALSE	FALSE	FALSE	OpJowc	0.05732	0.0073	IBS	TRUE	reported	textfile	0.0047	2.775e-06	7333	M37203.metal.pos.txt.gz	4-androsten-3beta,17beta-diol disulfate 2*	TRUE	reported	jMqRcI	2	TRUE	333768	0.00300607	22.104
rs4149056	T	C	T	C	-0.0485	-0.0146	0.8386	0.8464	FALSE	FALSE	FALSE	OpJowc	0.122	0.0094	IBS	TRUE	reported	textfile	0.0055	1.332e-18	7333	M37203.metal.pos.txt.gz	4-androsten-3beta,17beta-diol disulfate 2*	TRUE	reported	jMqRcI	2	TRUE	333768	0.0104929	77.7391
rs6584331	T	C	T	C	0.0211	-0.0006	0.4843	0.4808	FALSE	FALSE	FALSE	OpJowc	0.9345	0.0068	IBS	TRUE	reported	textfile	0.004	1.774e-07	7333	M37203.metal.pos.txt.gz	4-androsten-3beta,17beta-diol disulfate 2*	TRUE	reported	jMqRcI	2	TRUE	333768	0.00378023	27.818
rs6755484	T	C	T	C	-0.0191	0.0005	0.4847	0.4872	FALSE	FALSE	FALSE	OpJowc	0.9482	0.0072	IBS	TRUE	reported	textfile	0.0041	3.112e-06	7333	M37203.metal.pos.txt.gz	4-androsten-3beta,17beta-diol disulfate 2*	TRUE	reported	jMqRcI	2	TRUE	333768	0.00295076	21.696
rs7183977	T	C	T	C	-0.0233	-0.0128	0.6755	0.6549	FALSE	FALSE	FALSE	OpJowc	0.07807	0.0073	IBS	TRUE	reported	textfile	0.0047	7.189e-07	7333	M37203.metal.pos.txt.gz	4-androsten-3beta,17beta-diol disulfate 2*	TRUE	reported	jMqRcI	2	TRUE	333768	0.00334027	24.5696
rs7321271	C	G	C	G	0.0217	0.0036	0.2543	0.264	FALSE	TRUE	FALSE	OpJowc	0.6438	0.0078	IBS	TRUE	reported	textfile	0.0049	8.962e-06	7333	M37203.metal.pos.txt.gz	4-androsten-3beta,17beta-diol disulfate 2*	TRUE	reported	jMqRcI	2	TRUE	333768	0.00266738	19.6069
rs9445285	T	C	T	C	0.03	0.0129	0.1465	0.2109	FALSE	FALSE	FALSE	OpJowc	0.1225	0.0084	IBS	TRUE	reported	textfile	0.0068	9.333e-06	7333	M37203.metal.pos.txt.gz	4-androsten-3beta,17beta-diol disulfate 2*	TRUE	reported	jMqRcI	2	TRUE	333768	0.00264723	19.4584
rs966968	T	C	T	C	0.0214	0.0102	0.7093	0.71	FALSE	FALSE	FALSE	OpJowc	0.1745	0.0075	IBS	TRUE	reported	textfile	0.0048	7.859e-06	7333	M37203.metal.pos.txt.gz	4-androsten-3beta,17beta-diol disulfate 2*	TRUE	reported	jMqRcI	2	TRUE	333768	0.00270326	19.8713
rs9938618	A	G	A	G	-0.0452	-0.0285	0.943	0.9459	FALSE	FALSE	FALSE	OpJowc	0.0599	0.0151	IBS	TRUE	reported	textfile	0.0096	2.74e-06	7333	M37203.metal.pos.txt.gz	4-androsten-3beta,17beta-diol disulfate 2*	TRUE	reported	jMqRcI	2	TRUE	333768	0.00301399	22.1624

## Sheet: table 3
Supplementary Table 3 MR Analysis results
	id.exposure	id.outcome	outcome	exposure	Metabolite	nsnp	b_Inverse.variance.weighted	se_Inverse.variance.weighted	pval_Inverse.variance.weighted	b_Weighted.median	se_Weighted.median	pval_Weighted.median	b_MR.Egger	se_MR.Egger	pval_MR.Egger	Q_MR.Egger	Q_df_MR.Egger	Q_pval_MR.Egger	Q_Inverse.variance.weighted	Q_df_Inverse.variance.weighted	Q_pval_Inverse.variance.weighted	egger_intercept	se	pval	MR-PRESSO
1	hfKj9T	xrxeCl	IBS	M01302.metal	methionine	22	0.506574	0.250357	0.0430312	0.481804	0.357431	0.17767	-0.0672165	0.899713	0.941189	19.5537	20	0.486139	19.9946	21	0.521605	0.0050652	0.00762863	0.514291	0.531
2	HHOa8b	UqrdDC	IBS	M01358.metal	stearate (18:0)	43	-0.30658	0.114531	0.00743208	-0.290098	0.159488	0.068922	-0.562375	0.294715	0.0633842	37.5022	41	0.626878	38.3895	42	0.630234	0.00294789	0.00312946	0.351721	0.678
3	JAqP2H	RoewyC	IBS	M01638.metal	arginine	21	0.310511	0.1237	0.0120664	0.32851	0.172474	0.0568197	0.594061	0.397985	0.151942	19.6269	19	0.417332	20.2088	20	0.44494	-0.00415762	0.00553989	0.462155	0.472
4	3iJxkY	Y9CDZM	IBS	M01649.metal	valine	6	-0.634922	0.299159	0.0338079	-0.454146	0.37425	0.224945	-0.550113	0.412088	0.252808	1.80838	4	0.770949	1.89793	5	0.863081	-0.00148018	0.00494631	0.779654	0.85
5	wH3wNZ	dROXlk	IBS	M02342.metal	serotonin (5HT)	16	0.219373	0.093935	0.0195243	0.240823	0.128698	0.0613139	0.429785	0.214955	0.0653569	10.7631	14	0.704534	11.9475	15	0.682998	-0.00515088	0.00473303	0.294851	0.711
6	7pBT21	V3E7ff	IBS	M18349.metal	indolelactate	19	-0.237124	0.109504	0.0303539	-0.273633	0.154523	0.0765905	-0.367565	0.262763	0.179838	13.6443	17	0.692104	13.9425	18	0.732833	0.00255602	0.00468049	0.592092	0.778
7	2INybv	liqmo9	IBS	M18476.metal	glycocholate	9	-0.102155	0.0460558	0.0265507	-0.102894	0.0699654	0.141389	-0.0963104	0.0653526	0.184053	0.903251	7	0.996242	0.919138	8	0.998709	-0.000571349	0.00453288	0.90324	0.998
8	G5tXhy	9UD0Uh	IBS	M20675.metal	1,5-anhydroglucitol (1,5-AG)	31	-0.185478	0.0918996	0.0435631	-0.198151	0.116123	0.0879373	-0.21175	0.234093	0.373154	38.9673	29	0.102292	38.9874	30	0.126011	0.000527111	0.0043063	0.903423	0.144
9	ukWbX1	0z47oI	IBS	M21127.metal	1-palmitoylglycerol (1-monopalmitin)	14	0.397206	0.169342	0.0189971	0.265285	0.193674	0.170764	0.539949	0.59229	0.379914	21.1577	12	0.0481177	21.27	13	0.0677564	-0.00229678	0.00910074	0.805024	0.096
10	H94LAB	amrRnX	IBS	M22138.metal	homocitrulline	7	0.228346	0.113009	0.0433206	0.29983	0.146192	0.0402742	0.289391	0.311211	0.39511	2.08133	5	0.837781	2.12565	6	0.907787	-0.00192424	0.0091404	0.841572	0.897
11	BFqsPc	7oseQ7	IBS	M22175.metal	aspartylphenylalanine	7	0.188202	0.0861641	0.0289453	0.124019	0.11248	0.270206	0.105655	0.211703	0.638908	1.62575	5	0.898117	1.80798	6	0.936485	0.0033347	0.00781186	0.687226	0.906
12	Uy6qQN	ZlRM35	IBS	M24074.metal	X-09706	22	-0.214543	0.107817	0.046605	-0.224626	0.158103	0.155388	-0.441631	0.256666	0.100751	17.9869	20	0.588272	18.9374	21	0.589155	0.00448449	0.0045997	0.341229	0.626
13	RlBCRs	0NXxlg	IBS	M27710.metal	N-acetylglycine	16	0.107712	0.0505308	0.0330383	0.142857	0.0683097	0.0364998	0.0369043	0.0958776	0.706088	9.60306	14	0.79059	10.3582	15	0.796621	0.00332274	0.00382359	0.399494	0.839
14	h21aeB	BRKTzB	IBS	M32319.metal	trans-4-hydroxyproline	6	-0.230062	0.117291	0.0498252	-0.163888	0.154978	0.290287	0.0557398	0.266558	0.844581	2.77429	4	0.596279	4.19991	5	0.521008	-0.00877442	0.0073488	0.298447	0.599
15	DQa9Hj	ShzQxE	IBS	M32553.metal	phenol sulfate	16	-0.329556	0.0930651	0.000398415	-0.245673	0.103643	0.0177697	-0.134346	0.324601	0.685232	29.0395	14	0.0103226	29.8599	15	0.0124368	-0.0081958	0.0130315	0.539528	0.03
16	S28ZhO	raiBAv	IBS	M32754.metal	X-11437	15	-0.0699529	0.0336201	0.0374628	-0.0716039	0.044644	0.108739	-0.10268	0.0551045	0.0851525	7.30361	13	0.885835	7.8655	14	0.896215	0.0034097	0.00454873	0.466848	0.902
17	seIJCm	C3BXJ2	IBS	M32755.metal	X-11438	24	-0.16624	0.0791757	0.0357606	-0.148987	0.0999591	0.136099	-0.0698477	0.160709	0.66807	32.9456	22	0.0626435	33.6623	23	0.0702009	-0.00315082	0.00455435	0.496284	0.09
18	J7Z6XP	UjXgeI	IBS	M32838.metal	X-11521	12	-0.18977	0.0909825	0.0369982	-0.180663	0.128561	0.15994	0.0115017	0.226896	0.96057	6.30334	10	0.789166	7.24099	11	0.779245	-0.00577444	0.00596335	0.355719	0.785
19	QgsV1h	0twTqn	IBS	M32854.metal	X-11537	6	-0.253382	0.109853	0.0210795	-0.122815	0.12759	0.33576	-0.202578	0.570758	0.740566	7.72122	4	0.102341	7.73726	5	0.171323	-0.001978	0.0217024	0.931761	0.236
20	mSSmHh	AVxbSp	IBS	M33415.metal	X-12063	17	0.0875398	0.0440954	0.0471181	0.0981117	0.0476565	0.0395204	0.140894	0.0673879	0.0539822	20.97	15	0.137791	22.496	16	0.127885	-0.00394399	0.0037749	0.312664	0.204
21	mAV0xC	tzTuox	IBS	M33633.metal	X-12212	11	0.144792	0.0564244	0.010284	0.152329	0.0878594	0.0829565	0.25361	0.0997766	0.0316183	6.70868	9	0.667421	8.45734	10	0.584257	-0.00628491	0.00475276	0.218663	0.633
22	kU1KNy	aTNFOl	IBS	M33955.metal	1-palmitoylglycerophosphocholine	34	-0.551252	0.154606	0.000363133	-0.641909	0.211319	0.00238449	-0.949533	0.449951	0.0427408	36.8013	32	0.256237	37.8234	33	0.258407	0.0043035	0.00456474	0.352863	0.282
23	xKgtHo	OI9dAk	IBS	M33972.metal	10-nonadecenoate (19:1n9)	7	-0.348235	0.136169	0.0105465	-0.426586	0.178821	0.0170538	-0.587469	0.360531	0.164146	4.9833	5	0.417922	5.49687	6	0.481835	0.00589016	0.00821913	0.505666	0.531
24	u3kVnQ	CIgpFh	IBS	M34539.metal	X-12855	20	0.223391	0.0748153	0.00282741	0.224647	0.110828	0.0426624	0.169965	0.250826	0.506629	16.1541	18	0.581793	16.2039	19	0.643633	0.00159373	0.00714165	0.825924	0.663
25	d1ZFGd	L5D9kO	IBS	M35193.metal	X-13435	25	-0.251262	0.0982475	0.0105445	-0.167361	0.130686	0.200323	-0.685863	0.163576	0.000348118	25.7903	23	0.310864	36.5667	24	0.0483109	0.0101946	0.00328851	0.00504665	0.041
26	9cH6vz	mMKo5m	IBS	M35240.metal	X-13477	8	-0.362863	0.168582	0.0313622	-0.242649	0.218216	0.266152	-0.125608	0.445206	0.78732	5.11904	6	0.528639	5.45057	7	0.605153	-0.00498512	0.00865793	0.585691	0.657
27	xImU10	1eTwQl	IBS	M35305.metal	1-palmitoylglycerophosphoinositol*	11	-0.179356	0.084663	0.0341349	-0.302876	0.113793	0.00777576	-0.289727	0.174484	0.131188	5.72172	9	0.767414	6.24506	10	0.794272	0.00347896	0.00480904	0.487796	0.726
28	bPfpxq	UyKgO0	IBS	M35551.metal	X-13741	12	-0.1448	0.0603448	0.0164154	-0.119751	0.0745313	0.108115	0.0961926	0.23874	0.695488	11.9003	10	0.291786	13.1949	11	0.280776	-0.0110929	0.0106352	0.321492	0.315
29	C5mUNT	BUFqxc	IBS	M35669.metal	tetradecanedioate	21	0.131502	0.0434254	0.00245999	0.133854	0.0607767	0.0276379	0.042799	0.0735632	0.567542	10.764	19	0.931522	12.9956	20	0.877572	0.0051042	0.00341679	0.151635	0.882
30	zkvxCi	b7luLa	IBS	M35678.metal	hexadecanedioate	24	0.120497	0.0533459	0.023897	0.144521	0.077106	0.0608878	0.10793	0.11598	0.362164	18.5784	22	0.671196	18.5933	23	0.72456	0.000469954	0.00385119	0.903984	0.76
31	LD5GPc	fLL3ee	IBS	M35978.metal	X-14057	18	0.274362	0.0811982	0.000727723	0.310649	0.102886	0.00253312	0.323619	0.224984	0.169592	24.1376	16	0.0865425	24.2215	17	0.113542	-0.00167352	0.0070972	0.816579	0.158
32	blvEWe	TFRoUO	IBS	M36300.metal	X-14374	9	-0.409128	0.127867	0.00137603	-0.341144	0.177168	0.0541626	-0.422662	0.433501	0.362043	8.61066	7	0.28183	8.61199	8	0.376077	0.000316427	0.0096185	0.974674	0.357
33	BADDiU	uOLkdR	IBS	M36553.metal	X-14626	18	0.242675	0.0775488	0.0017521	0.207826	0.113215	0.0664056	0.09523	0.141853	0.511588	9.41396	16	0.895392	10.9549	17	0.858899	0.00449842	0.00362384	0.232371	0.869
34	jMqRcI	OpJowc	IBS	M37203.metal	4-androsten-3beta,17beta-diol disulfate 2*	19	0.170487	0.0831774	0.0403958	0.181818	0.11084	0.100928	0.511885	0.280414	0.0855509	22.0489	17	0.182845	24.1501	18	0.150171	-0.00915723	0.00719448	0.220217	0.153
				M01302.metal	methionine
			1	M01358.metal	stearate (18:0)
			1	M01638.metal	arginine
				M01649.metal	valine
			1	M21127.metal	1-palmitoylglycerol (1-monopalmitin)
			1	M33955.metal	1-palmitoylglycerophosphocholine
			1	M35305.metal	1-palmitoylglycerophosphoinositol*
					stearate (18:0)
					arginine
					1-palmitoylglycerol (1-monopalmitin)
					1-palmitoylglycerophosphoinositol*

## Sheet: table 4
Supplementary Table 4 The SNP-based heritability (h2) of the metabolites
Metabolite	trait	mean_chisq	lambda_gc	intercept	intercept_se	ratio	ratio_se	h2_observed	h2_observed_se	h2_Z	h2_p
stearate (18:0)	M01358.metal.pos.txt.gz	1.09495	1.09525	1.03025	0.00592209	0.318561	0.0623685	0.491881	0.0670888	7.33179	2.27103e-13
arginine	M01638.metal.pos.txt.gz	1.03338	1.02903	1.03135	0.00627991	0.939099	0.188114	0.0148036	0.0632951	0.233883	0.815076
indolelactate	M18349.metal.pos.txt.gz	1.05649	1.05353	1.00258	0.0057308	0.0457562	0.101443	0.424137	0.068031	6.23447	4.53305e-10
1-palmitoylglycerol (1-monopalmitin)	M21127.metal.pos.txt.gz	1.05152	1.04315	1.00486	0.00593178	0.0943247	0.115139	0.369214	0.0723199	5.10529	3.30285e-07
10-nonadecenoate	M33972.metal.pos.txt.gz	0.971295	0.965991	0.964278	0.00530889	1.24447	-0.18495	0.0525202	0.0575201	0.913075	0.361203
1-palmitoylglycerophosphoinositol	M35305.metal.pos.txt.gz	1.00364	0.993854	0.988777	0.00542383	-3.08577	1.49133	0.136828	0.0743765	1.83966	0.0658175
tetradecanedioate	M35669.metal.pos.txt.gz	1.04842	1.03197	1.01741	0.00663723	0.359543	0.137085	0.304426	0.119931	2.53834	0.0111379
hexadecanedioate	M35678.metal.pos.txt.gz	1.03865	1.02639	1.01932	0.00665184	0.499813	0.172102	0.165243	0.104378	1.58312	0.113394

## Sheet: table 5
Supplementary Table 5 Reverse MR Result
	id.exposure	id.outcome	outcome	exposure	nsnp	b_Inverse.variance.weighted	se_Inverse.variance.weighted	pval_Inverse.variance.weighted	b_Weighted.median	se_Weighted.median	pval_Weighted.median	b_MR.Egger	se_MR.Egger	pval_MR.Egger	Q_MR.Egger	Q_df_MR.Egger	Q_pval_MR.Egger	Q_Inverse.variance.weighted	Q_df_Inverse.variance.weighted	Q_pval_Inverse.variance.weighted	egger_intercept	se	pval
17	e37JPB	Wr4432	M32755.metal.pos.txt.gz	IBS	3	0.125563	0.0531862	0.0182343	0.142397	0.0652071	0.0289791	0.721326	0.876737	0.561717	0.154103	1	0.694645	0.617559	2	0.734343	-0.024577	0.0361014	0.619488
18	e37JPB	fxFxHV	M32838.metal.pos.txt.gz	IBS	3	-0.123272	0.0602004	0.04059	-0.128585	0.0720395	0.0742727	1.31367	0.968585	0.404465	0.11035	1	0.739746	2.31862	2	0.313703	-0.0593902	0.0399659	0.37709
32	e37JPB	6ceTWM	M36300.metal.pos.txt.gz	IBS	3	0.0918217	0.0454216	0.0432236	0.0962419	0.0541227	0.0753682	0.236591	0.763992	0.808816	0.00325382	1	0.954512	0.0392877	2	0.980548	-0.00601989	0.0317127	0.880574
28	e37JPB	ZM5i3o	M35551.metal.pos.txt.gz	IBS	3	0.205431	0.10343	0.0470129	0.230425	0.125724	0.066835	0.897161	1.75934	0.69979	0.0640822	1	0.800156	0.219205	2	0.89619	-0.0286996	0.0728682	0.761141
26	e37JPB	3Abt8Y	M35240.metal.pos.txt.gz	IBS	3	0.0686372	0.0426432	0.107491	0.0866506	0.0526028	0.0995039	-0.0358194	0.716929	0.968219	0.931623	1	0.334442	0.952926	2	0.620976	0.00434316	0.0297561	0.907731
5	e37JPB	4e0ehS	M02342.metal.pos.txt.gz	IBS	3	0.100486	0.065065	0.122493	0.105907	0.070646	0.133841	-0.72973	1.25907	0.665604	2.36334	1	0.124216	3.39474	2	0.183164	0.0342718	0.0518785	0.628339
10	e37JPB	jvOMK4	M22138.metal.pos.txt.gz	IBS	3	0.0840403	0.0551454	0.127515	0.0870049	0.0678842	0.19996	-0.500312	0.928711	0.685421	0.991508	1	0.319374	1.38881	2	0.499371	0.0243055	0.0385605	0.641955
16	e37JPB	HBaFE8	M32754.metal.pos.txt.gz	IBS	3	-0.193886	0.128	0.129839	-0.116077	0.157902	0.462267	-1.79954	2.18094	0.560813	0.394345	1	0.530024	0.938242	2	0.625552	0.0666004	0.0903064	0.595461
24	e37JPB	0Jj2zM	M34539.metal.pos.txt.gz	IBS	3	-0.0875138	0.0593125	0.140087	-0.0957758	0.0728623	0.188686	-0.534293	0.999304	0.687424	0.235127	1	0.627748	0.435723	2	0.804237	0.0185849	0.0414953	0.731926
6	e37JPB	5ulAQ2	M18349.metal.pos.txt.gz	IBS	3	0.0631445	0.0437406	0.148848	0.0595816	0.0483295	0.217643	0.523854	0.945291	0.677844	2.30444	1	0.129005	2.85372	2	0.240061	-0.0191525	0.0392294	0.710861
31	e37JPB	NZVixO	M35978.metal.pos.txt.gz	IBS	3	0.114599	0.0819155	0.161818	0.0399601	0.0875972	0.648261	1.62883	1.26014	0.419191	1.33791	1	0.247402	3.27646	2	0.194323	-0.0627442	0.0521254	0.441316
2	e37JPB	dS2NcN	M01358.metal.pos.txt.gz	IBS	3	0.0361153	0.0315122	0.251765	0.0229274	0.0332455	0.490422	0.781049	0.461577	0.339798	0.335542	1	0.562414	2.94844	2	0.228958	-0.0306267	0.0189469	0.352696
22	e37JPB	03Wa6L	M33955.metal.pos.txt.gz	IBS	3	0.0392011	0.0374744	0.295526	0.036001	0.0355169	0.31076	0.454042	0.796014	0.669998	3.53195	1	0.0601969	4.49456	2	0.105686	-0.0172761	0.0330923	0.693698
33	e37JPB	dWRizX	M36553.metal.pos.txt.gz	IBS	3	-0.041313	0.0471273	0.38069	-0.059152	0.0523484	0.258489	-0.370986	1.07989	0.789338	2.50429	1	0.113537	2.7385	2	0.254298	0.0137292	0.0448939	0.811062
23	e37JPB	6v74Q5	M33972.metal.pos.txt.gz	IBS	3	0.0458004	0.0523358	0.381506	0.00316642	0.0685028	0.963132	0.941132	0.865734	0.47345	0.737988	1	0.390306	1.81146	2	0.404247	-0.0369839	0.0356959	0.488719
3	e37JPB	bk8MSk	M01638.metal.pos.txt.gz	IBS	3	0.029268	0.0356304	0.411399	0.0424455	0.0443927	0.339003	-0.750316	0.585208	0.421693	0.156271	1	0.692614	1.93749	2	0.379559	0.0322016	0.0241279	0.40937
11	e37JPB	UWDYwi	M22175.metal.pos.txt.gz	IBS	3	0.0682528	0.084145	0.417289	0.113236	0.0961106	0.238723	1.64362	1.2841	0.422214	1.05215	1	0.305013	2.64117	2	0.26698	-0.0652105	0.0530629	0.434843
8	e37JPB	OpNqG2	M20675.metal.pos.txt.gz	IBS	3	0.0443348	0.0615259	0.471163	0.0928587	0.0571424	0.104154	1.329	0.783332	0.339063	1.30531	1	0.253246	4.82783	2	0.0894642	-0.0529285	0.0322195	0.348115
12	e37JPB	2iJWUM	M24074.metal.pos.txt.gz	IBS	3	-0.0205872	0.0363543	0.571194	-0.0262935	0.044585	0.555365	-0.881592	0.575741	0.368304	0.00142097	1	0.96993	2.24583	2	0.32533	0.0357852	0.0238865	0.3747
25	e37JPB	k9inRI	M35193.metal.pos.txt.gz	IBS	3	-0.0262507	0.0464051	0.571608	-0.0159181	0.0556564	0.774873	0.306643	1.014	0.813047	1.96322	1	0.16117	2.17561	2	0.336955	-0.013676	0.0415787	0.7977
14	e37JPB	5eQ0Yz	M32319.metal.pos.txt.gz	IBS	3	0.0237399	0.0509782	0.641439	0.0114071	0.0598339	0.848803	0.447443	0.858117	0.694016	0.329202	1	0.56613	0.573863	2	0.750563	-0.0176216	0.0356258	0.707572
15	e37JPB	Guqkyl	M32553.metal.pos.txt.gz	IBS	3	0.0345783	0.0849162	0.683858	-0.0313989	0.0924186	0.734047	1.74219	1.18755	0.38089	0.832886	1	0.361439	2.90781	2	0.233657	-0.0710454	0.0493214	0.386325
13	e37JPB	3rTdMe	M27710.metal.pos.txt.gz	IBS	3	-0.0267828	0.0733617	0.715053	-0.047194	0.0885538	0.594074	-1.27656	1.15919	0.469348	1.13346	1	0.287038	2.45588	2	0.292896	0.0516496	0.0478174	0.475485
20	e37JPB	RwHoT3	M33415.metal.pos.txt.gz	IBS	3	0.0261335	0.0732227	0.721164	0.0442799	0.092632	0.632637	-0.611553	1.41427	0.740173	1.27628	1	0.258593	1.53664	2	0.463791	0.0263963	0.058442	0.729921
27	e37JPB	rECZVC	M35305.metal.pos.txt.gz	IBS	3	-0.0140909	0.0522494	0.787402	-0.0533707	0.0646441	0.409027	0.128928	1.14689	0.928733	1.63031	1	0.201661	1.65574	2	0.436978	-0.00590666	0.0472861	0.920887
1	e37JPB	ChH8Dk	M01302.metal.pos.txt.gz	IBS	3	-0.00462012	0.0204068	0.820889	-0.00382596	0.0267095	0.886098	0.252012	0.370443	0.619696	1.18413	1	0.276517	1.75448	2	0.415929	-0.0106511	0.015347	0.613763
7	e37JPB	P8EUHq	M18476.metal.pos.txt.gz	IBS	3	-0.0180326	0.0829693	0.827943	-0.0540626	0.103174	0.600281	0.558498	1.5712	0.782575	1.3131	1	0.251834	1.49055	2	0.474604	-0.0238655	0.0649206	0.775734
9	e37JPB	WdGen7	M21127.metal.pos.txt.gz	IBS	3	-0.0214651	0.106519	0.840296	0.0431754	0.0632399	0.494782	0.0714656	2.63773	0.982756	13.8555	1	0.000197422	13.8727	2	0.000971804	-0.00383126	0.108569	0.977544
30	e37JPB	d8lHcr	M35678.metal.pos.txt.gz	IBS	3	-0.0124805	0.0638408	0.845006	-0.00596603	0.0746711	0.936319	0.669887	1.09726	0.651062	0.00032287	1	0.985664	0.388374	2	0.823504	-0.0281968	0.0452643	0.64533
34	e37JPB	nmweA4	M37203.metal.pos.txt.gz	IBS	3	0.0225889	0.121924	0.853017	0.0686767	0.0953831	0.47152	0.740672	2.74927	0.832468	7.11447	1	0.00764643	7.60161	2	0.0223527	-0.0296988	0.113496	0.837067
29	e37JPB	IYv1z6	M35669.metal.pos.txt.gz	IBS	3	-0.0110168	0.0712608	0.877138	-0.0333809	0.0860512	0.698076	-0.161506	1.17042	0.912704	0.687367	1	0.407062	0.70396	2	0.703294	0.00621615	0.0482557	0.918442
19	e37JPB	0A04Qp	M32854.metal.pos.txt.gz	IBS	3	-0.0116537	0.0931939	0.900486	-0.0791158	0.114503	0.489597	1.62103	1.5625	0.488298	0.757865	1	0.383997	1.85361	2	0.395817	-0.0678431	0.0648114	0.485453
21	e37JPB	KXOuNj	M33633.metal.pos.txt.gz	IBS	3	-0.00505497	0.0927318	0.956527	-0.0180805	0.107762	0.866754	0.904046	1.53585	0.661308	0.0272852	1	0.868801	0.378936	2	0.827399	-0.0376574	0.063503	0.659244
4	e37JPB	ZRXuFK	M01649.metal.pos.txt.gz	IBS	3	-0.000283521	0.0166654	0.986427	0.00117599	0.0188083	0.950145	-0.0813953	0.282372	0.821334	0.0141311	1	0.905375	0.0969328	2	0.952689	0.00337791	0.0117389	0.82163
